# Supplementary material for: Assessing kinetic fractionation in brachiopod calcite using clumped isotopes
Source: Sci Rep. 2018 Jan 11;8:533. doi: 10.1038/s41598-017-17353-7 (PMC5765054; doi:10.1038/s41598-017-17353-7)
Supplement: Supplementary file 2 — Supplementary Data 1 [file 41598_2017_17353_MOESM2_ESM.xlsx]

## Sheet: Replicates
#	Date	Sample	d47 (Gonf.)	D47 (Gonf.)	D47 (Brand)	StDev D47 (Gonf.)	StDev D47 (Brand)	d47 (Gonf., corr)	D47 (Gonf., corr)	D47 (Brand, corr)	StDev D47 (Gonf., corr)	StDev D47 (Brand, corr)	δ13C (Gonf.)	δ18O (Gonf.)	δ13C (Brand)	δ18O (Brand)	Diff. Bellow	Weight	Pressure Bellow	# Acqui	se (corr)	Typ	Tacid °C	δ18O (SMOW) G.	δ18O (VPDB) G.	δ18O (SMOW) B.	δ18O (VPDB) B.	∆47 G.	∆47 B.	Comment
1	2016-07-16	Carrara	17.9912	-0.427509	-0.422404	0.0302428	0.0302398	17.8173	-0.598336	-0.593229	0.0279256	0.0279258	1.96788	37.5124	1.9575	37.5223	159.313	7.6	30.1641	10	0.00883084	ca	90	29.1469	-1.71994	29.1567	-1.71043	0.397673	0.396257	Acid change
2	2016-07-16	Carrara	18.105	-0.414212	-0.409078	0.031723	0.0317331	17.9096	-0.606141	-0.601007	0.0211995	0.0211963	1.99892	37.5822	1.98854	37.5921	34.7262	6.9	27.2581	10	0.00670388	ca	90	29.2162	-1.65272	29.226	-1.64323	0.389246	0.388023
3	2016-07-16	MuStd	23.6612	0.00515887	0.0138114	0.0206662	0.0206667	23.3825	-0.267154	-0.258499	0.0173306	0.0173315	1.6046	43.097	1.59781	43.1064	-25.1129	6.6	25.7197	10	0.00548041	ar	90	34.2631	3.2428	34.2725	3.2519	0.755236	0.750603
4	2016-07-19	Carrara	18.0996	-0.423122	-0.417976	0.0300758	0.0300736	17.9232	-0.596225	-0.591078	0.0217062	0.0217069	1.98869	37.5959	1.97832	37.6057	173.904	9.3	36.147	10	0.0068641	ca	90	29.2297	-1.63959	29.2395	-1.63012	0.399952	0.398534
5	2016-07-21	Carrara	18.1855	-0.355766	-0.350608	0.0366234	0.036624	17.9414	-0.595446	-0.590287	0.0475566	0.047556	1.98841	37.6135	1.97805	37.6233	-33.6751	6	23.9248	9	0.0158522	ca	90	29.2471	-1.62268	29.2569	-1.61317	0.400793	0.399371
6	2016-07-21	(MB) GS183L_V_A	20.4631	-0.0132375	-0.00609647	0.0223333	0.0223335	20.193	-0.277973	-0.270829	0.0263507	0.0263509	1.18915	40.3257	1.18211	40.3353	2.69651	5.6	19.9932	10	0.00833284	ca	90	31.9375	0.987023	31.947	0.996238	0.743556	0.73755
7	2016-07-21	MuStd	23.4943	-0.00872622	-9.157e-05	0.0256178	0.0256169	23.2246	-0.27222	-0.263582	0.0226535	0.0226537	1.52808	43.0195	1.52152	43.0289	96.2205	7.3	28.8821	10	0.00716367	ar	90	34.1863	3.16832	34.1956	3.17735	0.749767	0.745222
8	2016-07-22	(MB) S006L_V_A	18.4627	-0.0244083	-0.0174462	0.0274069	0.0274054	18.2383	-0.24479	-0.237826	0.0288531	0.0288519	0.16798	39.3375	0.163251	39.3471	-2.63822	5.5	20.6769	10	0.00912415	ca	90	30.9573	0.0362005	30.9668	0.0453564	0.779381	0.772487
9	2016-07-23	(MB) 143_V_A	18.7184	-0.0689195	-0.0617387	0.0222456	0.0222457	18.5086	-0.274842	-0.267659	0.030729	0.0307307	0.13593	39.6704	0.131416	39.6799	158.833	6	22.8137	10	0.00971735	ca	90	31.2875	0.356435	31.297	0.365646	0.746935	0.740906
10	2016-07-23	Carrara	18.2705	-0.367071	-0.361899	0.030465	0.0304612	18.0446	-0.588816	-0.583642	0.0211818	0.0211807	2.03159	37.6678	2.02112	37.6776	-44.4795	5.9	23.4974	10	0.00669826	ca	90	29.301	-1.5704	29.3108	-1.56093	0.407951	0.406406
11	2016-07-23	(MB) 130_V_A	17.2734	-0.0138254	-0.00673311	0.0263081	0.0263055	17.0421	-0.241168	-0.234073	0.0232346	0.023233	-0.68047	38.9686	-0.683196	38.978	-64.387	5.4	20.0786	10	0.00734744	ca	90	30.5914	-0.318788	30.6007	-0.309714	0.783292	0.77646
12	2016-07-24	MuStd	23.7583	-0.0028432	0.00585256	0.0337	0.0337045	23.4882	-0.266707	-0.258008	0.0380814	0.0380797	1.62584	43.1813	1.61901	43.1908	8.27873	7.5	29.053	10	0.0120424	ar	90	34.3467	3.32394	34.3561	3.33304	0.755719	0.751122
13	2016-07-25	(MB) GS183L_V_A	20.1056	-0.0498289	-0.0428544	0.0278402	0.0278366	19.8873	-0.263808	-0.256832	0.0172881	0.0172878	1.1596	40.0344	1.15256	40.0439	89.9035	6.8	25.3778	10	0.00546697	ca	90	31.6485	0.706671	31.658	0.715896	0.758848	0.752367
14	2016-07-25	(MB) 130_V_A	17.1948	-0.0844342	-0.0773234	0.0363368	0.0363364	17.0328	-0.243692	-0.236579	0.0274388	0.0274397	-0.69981	38.9808	-0.702507	38.9903	157.749	7.5	27.9419	10	0.0086769	ca	90	30.6035	-0.30705	30.6129	-0.297903	0.780567	0.773807
15	2016-08-03	Carrara	17.9896	-0.341293	-0.336341	0.0272226	0.0272207	17.74	-0.586386	-0.581433	0.0212495	0.0212486	2.06318	37.3297	2.0525	37.3395	-51.8162	5.5	22.2154	10	0.0067197	ca	90	28.9657	-1.8957	28.9754	-1.88625	0.410575	0.408745	Acid change
16	2016-08-04	Carrara	17.9437	-0.426914	-0.421878	0.0278118	0.0278127	17.7469	-0.620187	-0.61515	0.0276866	0.0276879	2.00678	37.4262	1.99626	37.4361	181.121	7.6	30.506	10	0.00875526	ca	90	29.0614	-1.80285	29.0712	-1.79337	0.374081	0.373051
17	2016-08-04	MuStd	23.4945	-0.0132565	-0.00465892	0.0271625	0.0271622	23.2167	-0.284629	-0.276028	0.024555	0.0245575	1.56892	42.9842	1.56221	42.9936	112.635	6.5	25.2923	10	0.00776498	ar	90	34.1512	3.13431	34.1606	3.14339	0.736369	0.732046
18	2016-08-04	Carrara	18.0504	-0.387952	-0.382898	0.0208879	0.0208913	17.859	-0.575885	-0.57083	0.0295187	0.029516	2.02966	37.4708	2.01911	37.4807	58.5789	8.2	33.0701	10	0.00933462	ca	90	29.1056	-1.75995	29.1154	-1.75043	0.421912	0.419968
19	2016-08-05	(MB) 130_V_A	17.0298	-0.0434354	-0.036476	0.0255027	0.0255009	16.7842	-0.284919	-0.277956	0.0235317	0.0235318	-0.67587	38.7502	-0.678751	38.7596	-10.2157	6.7	24.694	10	0.00744139	ca	90	30.3747	-0.528968	30.3841	-0.519838	0.736056	0.730005
20	2016-08-05	MuStd	23.4307	0.00368002	0.0122099	0.0212497	0.0212481	23.1438	-0.276716	-0.268183	0.0159336	0.0159363	1.58708	42.8853	1.58025	42.8947	45.741	6.5	24.9504	10	0.00503866	ar	90	34.0532	3.03922	34.0625	3.04828	0.744912	0.740351
21	2016-08-05	(MB) S006L_V_A	18.2009	-0.0628677	-0.0560475	0.0398948	0.0398933	17.9838	-0.276125	-0.269302	0.0220839	0.0220837	0.17534	39.1074	0.170472	39.117	102.119	7.1	25.8051	10	0.00698355	ca	90	30.729	-0.185266	30.7385	-0.176046	0.74555	0.739166
22	2016-08-09	(MB) GS183L_V_A	19.9665	-0.0372927	-0.0303784	0.0330107	0.0330097	19.7439	-0.255588	-0.248671	0.0145504	0.0145504	1.12826	39.9132	1.12123	39.9228	135.23	6.3	22.7282	10	0.00460124	ca	90	31.5283	0.590093	31.5379	0.599333	0.767723	0.761006
23	2016-08-09	(MB) 143_V_A	18.6698	-0.0136085	-0.00650338	0.0533489	0.0533581	18.4273	-0.251695	-0.244587	0.00980589	0.00980728	0.14473	39.5568	0.140154	39.5662	-16.7341	5.4	20.4205	10	0.00310089	ca	90	31.1748	0.247131	31.1842	0.256246	0.771926	0.76533
24	2016-08-09	Carrara	18.164	-0.348836	-0.343729	0.0415913	0.0415869	17.9142	-0.594173	-0.589065	0.0341706	0.0341685	2.02048	37.5536	2.01001	37.5634	-10.7719	7.3	29.4803	10	0.0108057	ca	90	29.1877	-1.68032	29.1975	-1.6708	0.402167	0.400665
25	2016-08-09	(MB) S006L_V_A	18.378	-0.00817958	-0.00126803	0.0195302	0.0195288	18.1141	-0.267314	-0.260399	0.0227491	0.0227487	0.15919	39.2449	0.15436	39.2544	-53.3437	5.2	18.6256	10	0.00719389	ca	90	30.8654	-0.0529846	30.8748	-0.0438161	0.755063	0.748591
26	2016-08-10	MuStd	23.5059	0.0109856	0.019562	0.0429221	0.0429185	23.2284	-0.260184	-0.251605	0.0214499	0.0214469	1.58098	42.9589	1.57425	42.9683	90.8264	6.4	24.0103	10	0.00678304	ar	90	34.1261	3.10997	34.1355	3.11907	0.762761	0.757901
27	2016-08-10	(MB) 130_V_A	17.0527	-0.0363174	-0.029311	0.0210748	0.0210727	16.8805	-0.205627	-0.198618	0.0175684	0.0175677	-0.71377	38.8031	-0.716496	38.8126	113.68	5.3	18.7966	10	0.00555561	ca	90	30.4272	-0.47805	30.4366	-0.468935	0.821664	0.813992
28	2016-08-09	(MB) 143_V_A	18.7107	-0.0359544	-0.0288232	0.0471559	0.0471669	18.4599	-0.282169	-0.275034	0.0442384	0.0442419	0.15996	39.6056	0.155296	39.6151	-12.6457	6.3	24.0103	10	0.0139894	ca	90	31.2232	0.294124	31.2326	0.303253	0.739025	0.733098
29	2016-08-09	Carrara	18.1219	-0.341266	-0.336174	0.0305709	0.0305695	17.8812	-0.577623	-0.572531	0.0307577	0.0307581	2.00747	37.5165	1.99699	37.5264	-43.2223	6.3	25.5487	10	0.00972645	ca	90	29.151	-1.71599	29.1608	-1.70646	0.420035	0.418168
30	2016-08-24	MuStd	23.4009	-0.0238555	-0.0153259	0.0286293	0.0286349	23.1281	-0.290384	-0.281852	0.0176826	0.0176755	1.58722	42.8834	1.5804	42.8929	152.915	6.6	26.3179	10	0.00559172	ar	90	34.0513	3.03742	34.0607	3.04653	0.730155	0.725881	Acid change
31	2016-08-25	Carrara	18.1659	-0.359634	-0.354516	0.0267842	0.0267834	17.9072	-0.613571	-0.608452	0.0228425	0.0228424	2.02084	37.5661	2.0103	37.576	-39.1036	6.6	24.6085	10	0.00722345	ca	90	29.2002	-1.66825	29.21	-1.65872	0.381224	0.380141
32	2016-08-25	Carrara	18.1149	-0.347793	-0.342696	0.0325276	0.0325256	17.8569	-0.601136	-0.596038	0.0246366	0.0246349	2.0016	37.5219	1.99115	37.5318	26.0643	5	20.2496	10	0.00693065	ca	90	29.1563	-1.71082	29.1661	-1.7013	0.39465	0.393284
33	2016-08-26	(MB) GS183L_V_A	20.1574	0.00257957	0.00951481	0.022654	0.0226534	19.8772	-0.27211	-0.265172	0.0154379	0.0154358	1.19707	39.9959	1.18993	40.0056	-29.3711	6.3	22.9846	10	0.0048819	ca	90	31.6104	0.669675	31.6199	0.678955	0.749885	0.743538
34	2016-08-26	(MB) 143_V_A	18.6817	-0.0175963	-0.0105254	0.0328029	0.0328022	18.4273	-0.267402	-0.260328	0.0308047	0.0308049	0.1912	39.5271	0.186413	39.5367	-12.813	6.2	23.6684	10	0.00974129	ca	90	31.1454	0.218631	31.1549	0.227816	0.754968	0.748666
35	2016-08-26	MuStd	23.3955	0.0290845	0.0375516	0.028582	0.0285814	23.0738	-0.285244	-0.276774	0.0174238	0.017424	1.61097	42.8005	1.6041	42.8099	21.0104	6.1	24.7795	10	0.00550987	ar	90	33.9691	2.95762	33.9785	2.96674	0.735704	0.731257
36	2016-08-26	(MB) 130_V_A	17.1007	-0.0370839	-0.0300734	0.0249104	0.0249087	16.8889	-0.245342	-0.238328	0.028963	0.0289644	-0.6884	38.827	-0.691171	38.8365	124.618	6	21.6171	10	0.00915891	ca	90	30.4509	-0.455005	30.4604	-0.445863	0.778786	0.771955
37	2016-08-28	(MB) S006L_V_A	18.3998	0.00640094	0.013281	0.0337013	0.0336987	18.1457	-0.243164	-0.236281	0.0228122	0.0228099	0.19478	39.2168	0.189858	39.2264	30.8833	7.2	26.4889	10	0.00721386	ca	90	30.8376	-0.0799354	30.8471	-0.0706947	0.781137	0.774122
38	2016-08-28	MuStd	23.5882	0.0464706	0.055071	0.0275572	0.027557	23.2737	-0.260775	-0.252172	0.0195215	0.0195226	1.58503	43.0008	1.5783	43.0103	50.5531	5.3	20.1641	10	0.00617323	ar	90	34.1677	3.15034	34.1771	3.15946	0.762123	0.757301
39	2016-08-29	Carrara	18.1399	-0.330929	-0.325835	0.0296002	0.0295979	17.872	-0.593974	-0.588879	0.026979	0.0269793	2.00857	37.5229	1.99811	37.5328	-28.1494	6	23.9248	10	0.00853152	ca	90	29.1573	-1.70981	29.1671	-1.7003	0.402383	0.400862
40	2016-08-30	MuStd	23.0934	0.0343772	0.0428699	0.0233239	0.0233225	22.7902	-0.262035	-0.253539	0.0174271	0.0174273	1.40146	42.6991	1.39509	42.7086	54.6061	5.8	22.7282	10	0.00551094	ar	90	33.8686	2.86014	33.8779	2.86923	0.760763	0.755853
41	2016-08-30	Carrara	18.1318	-0.325473	-0.32039	0.0284247	0.0284235	17.8562	-0.595995	-0.590911	0.0178935	0.0178926	2.01168	37.5062	2.00117	37.516	-25.0679	4.8	19.4803	10	0.00565843	ca	90	29.1407	-1.72592	29.1505	-1.71643	0.4002	0.398711
42	2016-08-31	(MB) 143_V_A	18.244	-0.0277207	-0.0207755	0.0338322	0.0338305	18.0147	-0.252956	-0.246008	0.0245778	0.024577	0.05778	39.2302	0.0532058	39.2397	78.5372	7	25.8906	10	0.00777219	ca	90	30.8509	-0.0670613	30.8603	-0.0579033	0.770565	0.763826
43	2016-08-31	(MB) S006L_V_A	18.0999	-0.0234003	-0.0166026	0.0150444	0.0150421	17.8655	-0.253646	-0.246846	0.0220915	0.0220936	0.11287	39.0273	0.108089	39.0369	61.2049	4.6	17.6855	10	0.00698593	ca	90	30.6496	-0.262289	30.6591	-0.253109	0.769819	0.762938
44	2016-08-31	MuStd	23.0657	0.0259331	0.0343505	0.0447759	0.044785	22.7655	-0.267558	-0.259137	0.0180161	0.0180128	1.46523	42.6173	1.45862	42.6268	86.1609	5.9	23.6684	10	0.00569718	ar	90	33.7875	2.78145	33.7968	2.79056	0.7548	0.749927
45	2016-08-31	Carrara	18.1499	-0.371019	-0.365913	0.0239915	0.023991	17.9003	-0.616087	-0.610979	0.0180906	0.0180909	2.02581	37.5568	2.01535	37.5666	35.4874	7	27.6855	10	0.00572076	ca	90	29.1909	-1.67721	29.2007	-1.66773	0.378508	0.377467
46	2016-09-01	(MB) 130_V_A	17.1317	-0.0645723	-0.0575422	0.0236817	0.0236796	16.9322	-0.260681	-0.253648	0.0150338	0.0150325	-0.67264	38.8706	-0.675418	38.8801	115.374	6.6	25.2068	10	0.00475412	ca	90	30.4942	-0.413035	30.5036	-0.403918	0.762225	0.755738
47	2016-09-07	MuStd	23.5566	0.0358398	0.044441	0.0269015	0.0268989	23.2366	-0.276809	-0.268204	0.0117915	0.011792	1.5714	42.9936	1.5647	43.0031	-45.1079	5	19.2239	10	0.00372879	ar	90	34.1606	3.1434	34.17	3.15248	0.744812	0.740328	Acid change
48	2016-09-07	MuStd	23.5892	0.0315459	0.0401521	0.0244603	0.024459	23.2796	-0.270949	-0.262339	0.0214711	0.0214698	1.58893	43.0133	1.58219	43.0228	54.3903	5.1	19.8222	10	0.00678975	ca	90	34.6035	3.57298	34.6128	3.58207	0.751139	0.746537
49	2016-09-08	Carrara	18.1671	-0.34565	-0.340536	0.0182774	0.0182776	17.9035	-0.604451	-0.599336	0.013094	0.0130922	2.01543	37.5584	2.00495	37.5682	-49.0885	5.8	22.8991	10	0.00414069	ca	90	29.1925	-1.6757	29.2023	-1.66619	0.391071	0.389792
50	2016-09-08	MuStd	23.6361	0.0411478	0.049751	0.0243497	0.0243495	23.3142	-0.27339	-0.264783	0.0324016	0.0324031	1.61167	43.028	1.60495	43.0374	18.5332	5.5	20.7624	10	0.0102463	ar	90	34.1947	3.17645	34.204	3.18553	0.748503	0.74395
51	2016-09-09	Carrara	18.3374	-0.363851	-0.358673	0.0277853	0.0277836	18.1159	-0.581317	-0.576138	0.0165791	0.0165785	2.06673	37.6971	2.05613	37.7069	166.3	5.9	23.9248	10	0.00524278	ca	90	29.3301	-1.54225	29.3399	-1.53276	0.416048	0.414349
52	2016-09-10	(MB) S006L_V_A	18.6133	0.0419863	0.0489745	0.0298334	0.0298319	18.3279	-0.238231	-0.23124	0.0201912	0.0201909	0.19318	39.3959	0.188363	39.4054	-111.518	4.3	15.4632	10	0.00638501	ca	90	31.0152	0.092344	31.0247	0.101522	0.786463	0.779459
53	2016-09-10	MuStd	23.3953	0.0663152	0.0748653	0.0333391	0.0333378	23.0619	-0.259421	-0.250868	0.0272023	0.0272017	1.50726	42.8642	1.50063	42.8737	-45.0315	5	19.3094	10	0.00860211	ar	90	34.0323	3.01895	34.0417	3.02803	0.763585	0.758681
54	2016-09-10	(MB) GS183L_V_A	20.0297	-0.00616638	0.000741674	0.0296387	0.0296383	19.7588	-0.271762	-0.264851	0.0272438	0.0272461	1.15417	39.9192	1.14703	39.9288	2.69132	7.2	26.6598	10	0.00861525	ca	90	31.5343	0.595895	31.5438	0.605138	0.750261	0.743878
55	2016-09-10	(MB) 143_V_A	18.5822	-0.022057	-0.0150107	0.0399906	0.0399883	18.3411	-0.258724	-0.251675	0.0222131	0.0222132	0.1564	39.4662	0.151726	39.4757	94.6125	5.4	21.5316	10	0.0070244	ca	90	31.0849	0.159966	31.0943	0.169109	0.764337	0.757826
56	2016-09-10	Carrara	18.1573	-0.376699	-0.371545	0.0317968	0.0318039	17.9281	-0.601727	-0.596572	0.0239811	0.0239842	1.98895	37.6062	1.97853	37.616	72.7593	5.3	21.1043	10	0.00758347	ca	90	29.2399	-1.62969	29.2497	-1.62024	0.394012	0.392718
57	2016-09-11	(MB) 130_V_A	17.3749	0.0171592	0.0242497	0.0227553	0.0227537	17.099	-0.254016	-0.246921	0.0134981	0.0134973	-0.63766	38.9966	-0.640444	39.0061	-92.7665	5.7	21.0188	10	0.00426847	ca	90	30.6191	-0.291857	30.6285	-0.282739	0.769421	0.762858
58	2016-09-11	Carrara	18.1655	-0.350432	-0.34531	0.0561418	0.0561507	17.9204	-0.591075	-0.585951	0.0211242	0.021129	2.00712	37.5697	1.99669	37.5796	26.4801	5.2	20.8479	10	0.00668005	ca	90	29.2038	-1.66474	29.2136	-1.65527	0.405512	0.403961
59	2016-09-12	MuStd	23.5248	0.0379275	0.0465007	0.0238792	0.0238781	23.1946	-0.284668	-0.276091	0.0292298	0.029229	1.58003	42.9512	1.57325	42.9607	-31.715	5	18.9675	10	0.00924327	ar	90	34.1185	3.10259	34.1279	3.11169	0.736327	0.73198	Acid change
60	2016-09-13	Carrara	18.1973	-0.291966	-0.286827	0.0364309	0.036431	17.8973	-0.586485	-0.581345	0.0294093	0.0294096	1.97565	37.5728	1.96528	37.5827	-135.522	5.6	16.0615	10	0.00930003	ca	90	29.2068	-1.66185	29.2166	-1.65231	0.410467	0.408837
61	2016-09-13	MuStd	23.5623	0.041243	0.0498586	0.0377124	0.0377098	23.2332	-0.2803	-0.271681	0.0190653	0.0190631	1.55848	43.0064	1.55181	43.0159	-3.14413	5.2	18.3692	10	0.00602896	ar	90	34.1733	3.1557	34.1827	3.16483	0.741043	0.736648
62	2016-09-13	Carrara	18.107	-0.306202	-0.301101	0.0284001	0.0283979	17.8302	-0.578069	-0.572967	0.0289599	0.0289614	1.96748	37.5051	1.95709	37.5149	-88.2837	5.1	14.694	10	0.00915791	ca	90	29.1396	-1.72699	29.1494	-1.7175	0.419554	0.417706
63	2016-09-13	MuStd	23.5375	0.0510334	0.0596208	0.0519719	0.0519797	23.2096	-0.269328	-0.260737	0.0199463	0.019947	1.56348	42.9668	1.5568	42.9762	41.0483	5.4	20.2496	10	0.00630758	ar	90	34.134	3.11757	34.1433	3.12663	0.752889	0.748233
64	2016-09-15	Carrara	18.2202	-0.292974	-0.287815	0.0381649	0.0381643	17.9317	-0.576214	-0.571054	0.0235407	0.0235414	1.96947	37.6028	1.95912	37.6127	-96.99	5.4	14.865	10	0.00744421	ca	90	29.2366	-1.63295	29.2464	-1.62345	0.421557	0.419732
65	2016-09-15	MuStd	23.4514	0.0394566	0.0480052	0.0441549	0.0441515	23.1368	-0.267909	-0.259357	0.0195903	0.0195869	1.55702	42.8988	1.55034	42.9082	97.2423	5.2	19.2239	10	0.00619501	ar	90	34.0666	3.05221	34.0759	3.06128	0.75442	0.749694
66	2016-09-16	(MB) PA.01	20.1137	-0.081733	-0.0750997	0.026301	0.0263004	19.8839	-0.306944	-0.300309	0.0253077	0.0253084	1.52159	39.7198	1.51343	39.7295	193.212	6.8	24.9504	10	0.00800301	ca	90	31.3365	0.403996	31.3461	0.413295	0.712276	0.706342
67	2016-09-16	(MB) TC.01	16.6462	-0.126348	-0.121113	0.0537617	0.0537714	16.4182	-0.35053	-0.345294	0.0192519	0.0192572	0.84412	36.96	0.836414	36.9698	46.3586	6.4	23.1556	10	0.00608799	ca	90	28.5989	-2.25146	28.6086	-2.24205	0.665218	0.658722
68	2016-09-17	MuStd	23.5551	0.0394748	0.0480507	0.020555	0.0205529	23.2311	-0.277108	-0.268529	0.0185858	0.0185865	1.59304	42.9671	1.58627	42.9766	6.44779	7.1	26.9162	10	0.00587736	ar	90	34.1343	3.11793	34.1437	3.12699	0.744489	0.739985
69	2016-09-17	Carrara	18.1377	-0.358666	-0.353508	0.0253476	0.0253452	17.9159	-0.57647	-0.571311	0.025747	0.0257473	1.96065	37.5959	1.95033	37.6057	130.892	6.2	18.1983	10	0.00814191	ca	90	29.2297	-1.63956	29.2395	-1.63015	0.421281	0.419459
70	2016-09-18	MuStd	23.5412	0.0621775	0.0707386	0.0280931	0.0280919	23.1958	-0.275345	-0.26678	0.0228798	0.022879	1.58642	42.9365	1.57962	42.946	-7.88361	5.8	21.6171	10	0.00723523	ar	90	34.104	3.08848	34.1133	3.09756	0.746392	0.741836
71	2016-09-18	Carrara	18.2496	-0.343817	-0.338631	0.0237287	0.0237295	17.9863	-0.602323	-0.597137	0.0196245	0.0196257	1.99108	37.6628	1.98076	37.6726	-26.7842	6.3	18.1983	10	0.00620581	ca	90	29.2961	-1.57521	29.3058	-1.56574	0.393368	0.39212
72	2016-09-18	(MB) PA.01	20.2216	-0.0666744	-0.0600025	0.0318975	0.0318975	19.9716	-0.311675	-0.305001	0.0148523	0.0148522	1.53628	39.7978	1.52822	39.8075	109.514	6.8	24.865	10	0.00469672	ca	90	31.4139	0.479056	31.4235	0.48838	0.707169	0.701376
73	2016-09-18	(MB) TC.01	16.6242	-0.152477	-0.147238	0.0363465	0.0363431	16.4225	-0.350766	-0.345525	0.0227504	0.0227503	0.8413	36.9673	0.833636	36.977	140.931	6.8	24.7795	10	0.00719429	ca	90	28.6062	-2.24439	28.6159	-2.23504	0.664963	0.658476
74	2016-09-19	Carrara	18.2376	-0.346256	-0.341103	0.0184624	0.0184632	17.9974	-0.582111	-0.576957	0.0246972	0.0246966	2.01779	37.6272	2.00737	37.637	63.545	7.1	20.7624	10	0.00780993	ca	90	29.2607	-1.6095	29.2705	-1.60001	0.41519	0.413483	Acid change
75	2016-10-10	Carrara	18.0543	-0.403987	-0.398881	0.0381321	0.0381386	17.8551	-0.599503	-0.594396	0.0196776	0.0196743	1.99182	37.528	1.98137	37.5379	174.754	7.6	25.6342	10	0.0062226	ca	90	29.1624	-1.70489	29.1722	-1.69537	0.396413	0.395021
76	2016-10-11	Carrara	18.1013	-0.348651	-0.343548	0.0132407	0.0132392	17.8193	-0.625531	-0.620427	0.0203355	0.0203359	1.98663	37.5237	1.97624	37.5336	-38.1563	5.9	19.3094	10	0.00643065	ca	90	29.1582	-1.709	29.1679	-1.6995	0.368311	0.367465
77	2016-10-11	MuStd	23.5567	0.0455912	0.0541901	0.0232687	0.0232668	23.2128	-0.290441	-0.281838	0.019731	0.0197311	1.5679	42.9871	1.56121	42.9966	-23.4252	4.6	17.3436	10	0.0062395	ar	90	34.1542	3.13717	34.1636	3.14628	0.730094	0.725896
78	2016-10-12	Carrara	18.0288	-0.365409	-0.360339	0.0365572	0.0365543	17.7907	-0.599149	-0.594078	0.023332	0.023331	1.98876	37.4663	1.97826	37.4762	112.775	6.2	19.3949	10	0.00737823	ca	90	29.1012	-1.76428	29.111	-1.75477	0.396795	0.395358
79	2016-10-13	MuStd	23.5552	0.0434832	0.0520805	0.0322381	0.0322408	23.2149	-0.289019	-0.280418	0.0263465	0.0263417	1.57147	42.9843	1.56472	42.9938	-8.11687	5.4	20.335	10	0.00833149	ar	90	34.1514	3.13446	34.1608	3.14357	0.731629	0.727399
80	2016-10-14	Carrara	18.1262	-0.347259	-0.342148	0.0149049	0.0149051	17.8713	-0.597561	-0.592449	0.0225809	0.0225816	1.99379	37.5403	1.98334	37.5502	58.8838	6	19.4803	10	0.00714071	ca	90	29.1746	-1.69307	29.1844	-1.68358	0.398509	0.397083
81	2016-10-14	MuStd	23.6026	0.0507876	0.0593886	0.0190336	0.0190327	23.2631	-0.28091	-0.272305	0.013542	0.013541	1.59081	43.0052	1.58403	43.0147	-17.5898	5.9	21.788	10	0.00428234	ar	90	34.1721	3.15457	34.1815	3.16366	0.740384	0.735987
82	2016-10-15	Carrara	18.1553	-0.343108	-0.337995	0.0203644	0.0203644	17.8857	-0.60784	-0.602726	0.0206186	0.0206196	2.0069	37.5524	1.99644	37.5622	-16.8645	6	19.4803	10	0.00652017	ca	90	29.1865	-1.68147	29.1963	-1.67198	0.387411	0.386203
83	2016-10-15	MuStd	23.5184	0.0468033	0.0553925	0.024553	0.0245488	23.1994	-0.264887	-0.256294	0.0175757	0.0175758	1.55741	42.9581	1.55061	42.9675	8.51473	4.6	17.0017	10	0.00555793	ar	90	34.1253	3.1092	34.1347	3.1183	0.757684	0.752937
84	2016-10-16	Carrara	18.1233	-0.36824	-0.36311	0.0298433	0.0298429	17.858	-0.628683	-0.623552	0.0235072	0.0235083	1.9878	37.5645	1.97739	37.5744	-26.1265	6	19.1385	10	0.00743363	ca	90	29.1986	-1.66976	29.2084	-1.66022	0.364909	0.364157
85	2016-10-16	(MB) DS288L_V_AO	21.116	-0.0277301	-0.0207855	0.0328226	0.0328184	20.8296	-0.308203	-0.301256	0.0241648	0.0241638	1.78104	40.4123	1.7726	40.422	56.8014	5.6	20.335	10	0.00764159	ca	90	32.0234	1.07035	32.033	1.07966	0.710917	0.70534
86	2016-10-17	MuStd	23.5013	0.0378537	0.0464279	0.0739154	0.0739184	23.1693	-0.286553	-0.277976	0.0326671	0.0326663	1.56333	42.9442	1.55662	42.9536	25.8826	6.2	23.5829	10	0.0103302	ar	90	34.1116	3.09589	34.1209	3.10494	0.734291	0.729984
87	2016-10-17	(MB) S006L_V_AO	18.1964	0.0209982	0.0278936	0.0215007	0.0215013	17.8906	-0.279365	-0.272466	0.0203314	0.0203319	0.04849	39.142	0.0438865	39.1515	-150.273	5.4	18.9675	10	0.00642935	ca	90	30.7633	-0.151974	30.7728	-0.142796	0.742053	0.735817
88	2016-10-17	Carrara	18.1259	-0.330288	-0.325179	0.0295593	0.0295599	17.8442	-0.606797	-0.601687	0.0167866	0.0167883	1.98537	37.5309	1.97496	37.5408	-92.442	6.1	19.8222	10	0.00530837	ca	90	29.1652	-1.70214	29.175	-1.69264	0.388538	0.387304
89	2016-10-17	(MB) 143_V_AO	17.7977	0.018328	0.0253457	0.0349117	0.0349087	17.5036	-0.270599	-0.263577	0.0352322	0.0352305	-0.31028	39.0975	-0.313951	39.1071	-122.872	4.7	16.7453	10	0.0111414	ca	90	30.7193	-0.194715	30.7287	-0.18557	0.751517	0.745226
90	2016-10-19	MuStd	23.5056	0.00804529	0.016623	0.0439973	0.044006	23.1998	-0.290826	-0.282245	0.0179524	0.0179584	1.58214	42.9605	1.57539	42.97	40.6351	7	26.7453	10	0.00567706	ar	90	34.1278	3.11154	34.1371	3.12065	0.729678	0.725465
91	2016-10-19	(MB) DS430L_V_AO	21.522	0.0237076	0.0304077	0.0283643	0.0283641	21.1941	-0.297268	-0.290566	0.020758	0.0207592	2.23329	40.322	2.22362	40.3317	-97.6369	4.2	14.865	10	0.00656427	ca	90	31.9338	0.983415	31.9434	0.992731	0.722723	0.716656
92	2016-10-19	Carrara	18.086	-0.352363	-0.347257	0.033341	0.0333408	17.8509	-0.583147	-0.57804	0.0167839	0.0167869	1.97791	37.5208	1.9675	37.5307	65.677	5.5	18.2838	10	0.00530753	ca	90	29.1552	-1.71185	29.165	-1.70235	0.414072	0.412337
93	2016-10-19	(MB) DS420L_V_AO	19.5085	-0.0060869	0.000880273	0.0435044	0.0435088	19.2283	-0.280975	-0.274005	0.0311336	0.0311322	0.78118	39.7638	0.775005	39.7733	-11.2014	5.1	18.5402	10	0.0098453	ca	90	31.3801	0.446313	31.3896	0.455523	0.740314	0.734188
94	2016-10-20	(MB) DA5.25.2	20.8069	-0.0252631	-0.018539	0.0193613	0.0193582	20.5132	-0.312947	-0.306221	0.0307206	0.0307231	1.81303	40.0695	1.80426	40.0791	24.2635	6.1	22.3009	10	0.00971471	ca	90	31.6834	0.740463	31.6929	0.749748	0.705795	0.700084
95	2016-10-20	(MB) DS431L_V_AO	21.4153	-0.0444936	-0.0377448	0.0213356	0.0213334	21.1697	-0.284902	-0.278151	0.0148158	0.0148169	2.16459	40.3524	2.15508	40.3621	181.109	8	29.1385	10	0.00468518	ca	90	31.964	1.01266	31.9736	1.02198	0.736075	0.729799
96	2016-10-21	(MB) D487L_V_AO	16.8483	-0.039499	-0.0325066	0.0247351	0.0247329	16.615	-0.268898	-0.261902	0.0172574	0.0172572	-0.81973	38.7056	-0.822266	38.715	57.9636	8.9	32.2154	10	0.00545727	ca	90	30.3304	-0.571872	30.3398	-0.562764	0.753353	0.747
97	2016-10-21	Carrara	18.1063	-0.348197	-0.343078	0.0336418	0.0336404	17.8345	-0.615098	-0.609978	0.0169077	0.0169054	1.97386	37.5409	1.9635	37.5507	-9.17628	4.8	15.7197	10	0.00534667	ca	90	29.1751	-1.69254	29.1849	-1.68305	0.379575	0.378527
98	2016-10-21	MuStd	23.588	0.0655731	0.0741843	0.0354491	0.0354549	23.2482	-0.26639	-0.257775	0.0108998	0.0109012	1.56287	43.0029	1.55618	43.0124	-36.5503	5.2	19.2239	10	0.00344682	ar	90	34.1698	3.15234	34.1792	3.16145	0.756061	0.751369
99	2016-10-22	Carrara	18.0056	-0.360952	-0.355866	0.0255797	0.0255771	17.7697	-0.592572	-0.587486	0.0236056	0.0236051	1.95496	37.4716	1.94461	37.4815	25.6767	4.7	15.2923	10	0.00746475	ca	90	29.1064	-1.75922	29.1162	-1.74968	0.403896	0.402337
100	2016-10-22	MuStd	23.5385	0.0785847	0.0871525	0.0276056	0.0276049	23.1729	-0.278626	-0.270054	0.0198398	0.0198401	1.56687	42.9362	1.56014	42.9457	-151.451	4.6	17.3436	10	0.00627391	ar	90	34.1037	3.08821	34.113	3.09727	0.74285	0.738371
101	2016-10-23	(MB) S006L_V_AO	18.1397	-0.0331533	-0.0262508	0.0193881	0.0193875	17.8627	-0.305207	-0.298301	0.0226636	0.0226631	0.03936	39.1493	0.0348336	39.1588	-74.0033	6.5	24.2667	10	0.00716686	ca	90	30.7706	-0.144902	30.7801	-0.135747	0.714152	0.708468
102	2016-10-23	(MB) 143_V_AO	17.7255	-0.0169618	-0.00993256	0.0190489	0.0190497	17.459	-0.278851	-0.271819	0.0245007	0.0245018	-0.34407	39.0945	-0.347635	39.1039	-22.7101	5.7	20.1641	10	0.00774781	ca	90	30.7162	-0.197688	30.7256	-0.188582	0.742607	0.736502
103	2016-10-23	Carrara	18.0215	-0.310929	-0.305849	0.0207922	0.0207926	17.696	-0.630568	-0.625486	0.0227009	0.0227031	1.93876	37.4524	1.92843	37.4623	-151.439	4.4	14.3521	10	0.00717865	ca	90	29.0874	-1.77762	29.0972	-1.76811	0.362873	0.36211
104	2016-10-23	(MB) 130_V_AO	16.9946	0.00937573	0.0161726	0.0262305	0.0262277	16.6977	-0.282528	-0.275727	0.02562	0.0256196	-0.56848	38.5556	-0.571773	38.5651	-121.74	4.3	15.0359	10	0.00810176	ca	90	30.1817	-0.716181	30.1911	-0.706999	0.738638	0.732365
105	2016-10-23	(MB) DS288L_V_AO	21.017	-0.0177802	-0.0108734	0.0264933	0.0264904	20.7078	-0.320671	-0.313761	0.0317978	0.0317962	1.75356	40.3303	1.7451	40.3399	-6.48091	5.7	20.6769	10	0.0100554	ca	90	31.9421	0.99142	31.9516	1.00068	0.697456	0.692102
106	2016-10-24	(MB) DS430L_V_AO	21.3772	-0.0133074	-0.00663055	0.0336623	0.0336603	21.0715	-0.312615	-0.305936	0.0263857	0.0263852	2.19379	40.2539	2.18413	40.2635	9.91038	5.7	20.8479	10	0.00834389	ca	90	31.8663	0.917871	31.8758	0.927175	0.706153	0.700385
107	2016-10-24	(MB) DA5.25.2	20.5504	-0.046773	-0.0401208	0.0291419	0.0291416	20.2532	-0.337962	-0.331307	0.0304559	0.0304581	1.74211	39.9045	1.73352	39.9142	-34.1494	4.5	16.3179	10	0.00963099	ca	90	31.5197	0.581683	31.5293	0.591036	0.678788	0.673528
108	2016-10-24	Carrara	17.876	-0.381003	-0.375961	0.0316104	0.031609	17.6609	-0.59223	-0.587188	0.0209375	0.0209382	1.93287	37.384	1.92253	37.3939	120.521	4.8	15.9761	10	0.00662101	ca	90	29.0195	-1.8435	29.0293	-1.83397	0.404265	0.402652
109	2016-10-26	Carrara	18.0494	-0.341854	-0.33674	0.0553885	0.0553912	17.7906	-0.595924	-0.590809	0.0241308	0.0241297	1.94303	37.5076	1.93268	37.5175	-15.1008	4.6	12.9846	10	0.00763084	ca	90	29.1422	-1.72449	29.152	-1.71499	0.400277	0.398819
110	2016-10-26	Carrara	18.1683	-0.309581	-0.304449	0.0281466	0.0281423	17.8669	-0.605476	-0.600342	0.0180509	0.018051	1.97424	37.5631	1.9639	37.573	-131.089	5.4	14.5231	10	0.00570819	ca	90	29.1972	-1.67115	29.207	-1.66165	0.389965	0.388727
111	2016-10-26	MuStd	23.5174	0.0620426	0.0706132	0.03047	0.0304666	23.1799	-0.267715	-0.259141	0.0253748	0.0253733	1.56376	42.9351	1.557	42.9446	-24.0844	4.3	15.1214	10	0.00802423	ar	90	34.1025	3.08709	34.1119	3.09621	0.75463	0.749923
112	2016-10-26	(MB) PA.01	20.1492	-0.0233917	-0.0167469	0.0239218	0.0239197	19.8502	-0.316445	-0.309798	0.0128851	0.0128843	1.49541	39.7214	1.48733	39.7311	-24.9811	4.9	16.2325	10	0.00407464	ca	90	31.3381	0.405584	31.3477	0.414906	0.702019	0.696298	Acid change
113	2016-10-27	Carrara	17.9751	-0.339048	-0.333952	0.0442712	0.0442748	17.7125	-0.596923	-0.591826	0.018041	0.0180407	1.91316	37.4597	1.90289	37.4696	-12.1461	4.6	11.6171	10	0.00570506	ca	90	29.0947	-1.77059	29.1045	-1.76108	0.399198	0.397743
114	2016-10-27	Carrara	18.2161	-0.335343	-0.33019	0.0301618	0.0301575	17.9323	-0.61401	-0.608856	0.018723	0.0187214	2.0003	37.6116	1.98989	37.6215	-73.7741	4.2	17.8564	10	0.00592074	ca	90	29.2453	-1.62445	29.2552	-1.61491	0.380751	0.379714
115	2016-10-27	MuStd	23.3023	0.0234953	0.0320336	0.0387442	0.0387428	23.0092	-0.262931	-0.254389	0.0281259	0.0281256	1.48672	42.8352	1.48023	42.8446	91.2972	4.4	20.1641	10	0.00889419	ar	90	34.0035	2.991	34.0128	3.00007	0.759795	0.754953
116	2016-10-28	Carrara	18.0703	-0.310566	-0.305471	0.0363456	0.0363435	17.794	-0.581818	-0.576722	0.0141246	0.0141242	1.9536	37.4864	1.94324	37.4962	-75.8527	4.6	13.0701	10	0.00446658	ca	90	29.1211	-1.74499	29.1308	-1.73551	0.415506	0.413731
117	2016-10-28	MuStd	23.3461	0.0281434	0.0366979	0.0399181	0.0399183	23.051	-0.260176	-0.251619	0.0208108	0.0208145	1.49705	42.8642	1.49043	42.8736	102.25	5	17.9419	10	0.00658095	ar	90	34.0323	3.01894	34.0416	3.02797	0.762769	0.757886
118	2016-10-29	(MB) DS420L_V_AO	19.4577	-0.0360336	-0.0290576	0.0237909	0.0237897	19.2023	-0.286508	-0.27953	0.014779	0.014779	0.76228	39.7621	0.756087	39.7716	59.6616	4.5	22.6427	10	0.00467352	ca	90	31.3784	0.444697	31.3879	0.453889	0.73434	0.728339
119	2016-10-29	Carrara	18.1325	-0.34002	-0.334892	0.0269656	0.0269638	17.88	-0.587981	-0.582853	0.0121503	0.0121506	1.97683	37.5558	1.96646	37.5657	15.4707	5.9	16.4034	10	0.00384227	ca	90	29.19	-1.67815	29.1998	-1.66863	0.408852	0.407242
120	2016-10-29	(MB) 143_V_AO	17.7474	0.00322515	0.0102468	0.0422266	0.0422237	17.4917	-0.248012	-0.240987	0.0192575	0.0192553	-0.3355	39.0874	-0.339106	39.0969	-38.424	4.5	15.4632	10	0.00608974	ca	90	30.7092	-0.204452	30.7186	-0.195334	0.775903	0.769141
121	2016-10-29	(MB) S006L_V_AO	17.9788	-0.0651219	-0.0582412	0.0250547	0.025055	17.7597	-0.280346	-0.273463	0.0128246	0.0128256	-0.01397	39.0731	-0.0184365	39.0827	116.267	4.8	17.2581	10	0.00405548	ca	90	30.695	-0.21825	30.7045	-0.209047	0.740993	0.734761
122	2016-10-29	MuStd	23.5121	0.0283957	0.0369705	0.0289393	0.0289387	23.1829	-0.293342	-0.284763	0.0179393	0.0179395	1.57652	42.9518	1.56975	42.9612	-7.08255	5.9	21.6171	10	0.00567289	ar	90	34.1191	3.10314	34.1284	3.11221	0.726962	0.722799
123	2016-10-30	(MB) DS288L_V_AO	21.1364	0.00266375	0.00959636	0.0279048	0.0279023	20.8312	-0.296214	-0.289279	0.0144227	0.014422	1.78655	40.3964	1.77804	40.406	-10.0586	5.3	17.7709	10	0.00456085	ca	90	32.0076	1.055	32.0172	1.06426	0.723861	0.718019
124	2016-10-30	(MB) DS431L_V_AO	21.4423	-0.0268453	-0.0200886	0.0278375	0.0278338	21.1644	-0.298893	-0.292134	0.0196702	0.0196696	2.16143	40.3644	2.15197	40.3741	80.5159	8.2	29.6513	10	0.00622027	ca	90	31.9759	1.02422	31.9855	1.03356	0.720969	0.714996
125	2016-10-30	(MB) TC.01	16.5214	-0.118501	-0.113328	0.0369339	0.0369402	16.3057	-0.33068	-0.325505	0.0250195	0.0250223	0.82421	36.8465	0.816524	36.8563	38.3441	4.4	15.6342	10	0.00791187	ca	90	28.4864	-2.36061	28.4961	-2.35119	0.68665	0.67967
126	2016-10-30	(MB) DA5.25.2	20.6467	-0.0495506	-0.0428619	0.0269533	0.0269493	20.3491	-0.341074	-0.334383	0.014072	0.0140714	1.76843	39.9779	1.7597	39.9875	8.26056	5.9	20.5915	10	0.00444994	ca	90	31.5925	0.652298	31.6021	0.661611	0.675427	0.670271
127	2016-10-31	MuStd	23.5377	0.073589	0.0821595	0.0342444	0.0342425	23.1964	-0.259914	-0.25134	0.0253381	0.0253387	1.5694	42.9381	1.5626	42.9476	-47.8148	4.2	15.3778	10	0.00801262	ar	90	34.1055	3.09	34.1149	3.0991	0.763052	0.758181
128	2016-11-24	MuStd	23.3644	0.0209989	0.0295406	0.036004	0.0359993	23.0469	-0.289299	-0.280754	0.0186486	0.0186465	1.52645	42.8608	1.51975	42.8703	50.4639	5.9	21.3607	10	0.00589721	ar	90	34.0289	3.0157	34.0384	3.02482	0.731327	0.727043
129	2016-11-24	Carrara	18.054	-0.310547	-0.305454	0.0495493	0.0495561	17.7619	-0.597355	-0.592261	0.0287992	0.0287983	1.94539	37.4779	1.93508	37.4878	-105.702	5.4	15.2068	10	0.00910712	ca	90	29.1127	-1.75309	29.1225	-1.74355	0.398732	0.397282
130	2016-11-24	(MB) S006L_V_AO	17.8952	0.000239111	0.00715289	0.0301325	0.0301289	17.6135	-0.276534	-0.269617	0.0143319	0.01433	-0.13919	39.0457	-0.143322	39.0552	-90.8511	4.1	18.2838	10	0.00453214	ca	90	30.6679	-0.244585	30.6773	-0.235467	0.745109	0.738833
131	2016-11-24	MuStd	23.4295	0.0536758	0.0622497	0.019453	0.0194524	23.0798	-0.288098	-0.27952	0.0135533	0.0135534	1.51131	42.9074	1.50474	42.9168	-82.4417	4.5	16.3179	10	0.00428591	ar	90	34.0751	3.06043	34.0844	3.06954	0.732624	0.728349
132	2016-11-25	(MB) DS430L_V_AO	21.4698	0.0533219	0.0600319	0.026182	0.0261812	21.128	-0.281303	-0.274591	0.0157203	0.0157208	2.17599	40.2958	2.1664	40.3056	-138.876	4.4	15.4632	10	0.00497121	ca	90	31.9079	0.958273	31.9175	0.967624	0.73996	0.733568
133	2016-11-25	Carrara	18.086	-0.380525	-0.375376	0.0399115	0.0399075	17.8446	-0.617578	-0.612427	0.0229611	0.0229608	1.95291	37.574	1.94257	37.5839	83.1238	7.6	22.9846	10	0.00726094	ca	90	29.208	-1.66061	29.2178	-1.65113	0.376898	0.375934
134	2016-11-26	(MB) DS420L_V_AO	19.462	0.053435	0.060392	0.0326883	0.0326868	19.1415	-0.260911	-0.253951	0.0230569	0.0230565	0.7268	39.7099	0.720723	39.7194	-165.407	4.7	15.2068	10	0.00729124	ca	90	31.3266	0.394432	31.3361	0.403647	0.761976	0.755417
135	2016-11-26	(MB) DS431L_V_AO	21.4518	-0.0153625	-0.00860423	0.0243158	0.0243153	21.1458	-0.314952	-0.308191	0.0232139	0.0232133	2.15959	40.364	2.15008	40.3737	22.2791	8.2	28.1128	10	0.00734089	ca	90	31.9755	1.02387	31.9851	1.03319	0.703631	0.697998
136	2016-11-26	Mustd	23.4689	0.038555	0.0471125	0.0423929	0.0423924	23.119	-0.30336	-0.294798	0.024521	0.0245205	1.55969	42.9147	1.553	42.9241	-18.5028	5.9	21.4462	10	0.00775422	ar	90	34.0823	3.06746	34.0917	3.07653	0.716146	0.712176
137	2016-11-26	(MB) NN2V_V_AO	22.3784	0.0438818	0.0509068	0.0229599	0.0229586	22.0469	-0.280424	-0.273397	0.0154238	0.0154239	2.41651	40.9774	2.4066	40.9871	-45.4148	4.2	14.694	10	0.00487744	ca	90	32.584	1.61407	32.5936	1.62341	0.740908	0.734831
138	2016-11-26	(MB) D487L_V_AO	16.6388	-0.0343239	-0.0273644	0.0377282	0.0377256	16.4136	-0.255846	-0.248884	0.022111	0.022111	-0.91604	38.5849	-0.918411	38.5944	59.8117	5.9	18.0274	10	0.00699211	ca	90	30.2108	-0.68796	30.2201	-0.678876	0.767444	0.760781
139	2016-11-27	Carrara	18.0233	-0.357254	-0.352143	0.03832	0.038327	17.7865	-0.589773	-0.584661	0.0231647	0.0231615	1.93844	37.5018	1.9281	37.5116	66.7159	7.2	19.3949	10	0.00732533	ca	90	29.1363	-1.73017	29.1461	-1.72069	0.406918	0.405328
140	2016-11-27	(MB) DS420L_V_AO	19.42	0.00976433	0.0167087	0.0254527	0.0254524	19.1283	-0.27638	-0.269433	0.0212284	0.0212289	0.74182	39.6977	0.735686	39.7073	-83.0953	5.1	18.1983	10	0.00671302	ca	90	31.3146	0.382732	31.3241	0.391956	0.745275	0.739028
141	2016-11-27	(MB) DS288L_V_AO	21.1226	0.0389351	0.0458631	0.0371329	0.0371333	20.8086	-0.268592	-0.261662	0.0274855	0.0274864	1.7611	40.3704	1.75266	40.3801	-74.9797	5.5	19.5658	10	0.00869168	ca	90	31.9819	1.03	31.9915	1.03935	0.753683	0.747255
142	2016-11-27	MuStd	23.4664	0.0638003	0.072357	0.0325755	0.0325744	23.1167	-0.277932	-0.269371	0.0215758	0.0215771	1.54343	42.9023	1.53678	42.9118	-82.4965	5.5	20.0786	10	0.00682288	ar	90	34.0701	3.05558	34.0794	3.06467	0.743599	0.739093
143	2016-11-27	(MB) 130_V_AO	17.0498	0.0218849	0.0286971	0.0264915	0.0264887	16.7866	-0.236942	-0.230126	0.0180584	0.01806	-0.55893	38.5888	-0.562201	38.5983	-71.2189	4.7	16.4034	10	0.00571055	ca	90	30.2146	-0.684265	30.2241	-0.675071	0.787855	0.780638
144	2016-11-27	(MB) DA5.25.2	20.6486	-0.0112845	-0.00457641	0.0405832	0.0405788	20.3325	-0.32101	-0.314299	0.0177292	0.0177289	1.72358	39.9847	1.71509	39.9944	-75.4509	4.2	14.7795	10	0.00560648	ca	90	31.5992	0.658841	31.6088	0.668174	0.69709	0.691532
145	2016-11-27	Carrara	18.0253	-0.322953	-0.317842	0.0344299	0.0344259	17.7684	-0.57528	-0.570167	0.0172101	0.0172111	1.91876	37.4881	1.90847	37.498	-9.10971	5.1	14.5231	10	0.00544232	ca	90	29.1228	-1.74331	29.1326	-1.7338	0.422565	0.42067
146	2016-11-27	(MB) TC.01	16.5835	-0.111193	-0.105974	0.0170123	0.0170103	16.3603	-0.330775	-0.325555	0.016144	0.0161447	0.81419	36.9112	0.806519	36.921	25.1418	5	17.8564	10	0.0051052	ca	90	28.5505	-2.29842	28.5602	-2.28899	0.686547	0.679617
147	2016-11-28	(MB) PA.01	20.1393	-0.0132886	-0.00665654	0.0462844	0.0462946	19.8431	-0.303636	-0.297002	0.0172136	0.0172157	1.49553	39.7011	1.48745	39.7108	-47.0483	5.8	21.0188	9	0.00859227	ca	90	31.3179	0.386013	31.3276	0.395341	0.715848	0.709843
148	2016-11-28	MuStd	23.5408	0.0759784	0.0845638	0.0228268	0.0228253	23.1723	-0.284063	-0.275473	0.0210608	0.0210622	1.55153	42.9561	1.54493	42.9656	-92.669	4.6	16.9162	10	0.00666002	ar	90	34.1234	3.10732	34.1328	3.11646	0.73698	0.732634
149	2016-11-28	(MB) 143_V_AO	17.9686	0.0238986	0.0310162	0.0297079	0.0297072	17.6751	-0.264447	-0.257326	0.0192507	0.0192515	-0.3097	39.2626	-0.313289	39.2721	-121.718	4.4	14.7795	10	0.0060876	ca	90	30.883	-0.035925	30.8924	-0.0268001	0.758159	0.751845
150	2016-11-28	(MB) DS430L_V_AO	21.4949	0.044971	0.0517006	0.0345579	0.0345554	21.1699	-0.273256	-0.266525	0.0318663	0.031864	2.17732	40.3282	2.16772	40.3379	-127.507	4.3	15.2923	10	0.010077	ca	90	31.94	0.9894	31.9496	0.99872	0.748647	0.742106
151	2016-11-28	Carrara	18.0179	-0.319911	-0.314813	0.0352174	0.035216	17.753	-0.580057	-0.574958	0.0229303	0.0229285	1.92561	37.4708	1.91532	37.4807	-70.5784	4.8	13.5829	10	0.00725121	ca	90	29.1056	-1.75994	29.1155	-1.75042	0.417408	0.415599
152	2016-11-28	MuStd	23.4985	0.0658882	0.0744816	0.0276147	0.027613	23.1463	-0.278258	-0.269661	0.0189227	0.0189213	1.52699	42.9485	1.52034	42.9579	-56.4664	5.5	19.9077	10	0.00598389	ar	90	34.1158	3.09999	34.1252	3.10906	0.743247	0.738786
153	2016-11-30	Carrara	18.0995	-0.305339	-0.300202	0.023036	0.0230325	17.8025	-0.597061	-0.591923	0.0220508	0.0220516	1.92526	37.538	1.91501	37.5478	-102.812	5.2	14.6085	10	0.00697307	ca	90	29.1723	-1.69525	29.1821	-1.68582	0.399049	0.39764
154	2016-11-30	(MB) FTD1_D_AO	22.5993	0.0390884	0.0466793	0.0354948	0.0354944	22.2798	-0.27337	-0.265776	0.018188	0.0181879	1.9912	41.6206	1.98277	41.6302	4.76993	5.1	17.8564	10	0.00575154	ca	90	33.222	2.23291	33.2315	2.24214	0.748525	0.742899
155	2016-11-30	(MB) SLU1_V_AO	23.8681	0.0607837	0.0694908	0.033437	0.0334344	23.5592	-0.240951	-0.23224	0.0196057	0.0196075	1.63872	43.2133	1.63193	43.2227	75.6354	5.5	19.6513	10	0.00619988	ca	90	34.8018	3.76538	34.8112	3.77446	0.783526	0.7784
156	2016-11-30	MuStd	23.4618	0.0462085	0.0547702	0.0501926	0.0501959	23.1333	-0.274773	-0.266207	0.0243945	0.0243871	1.54869	42.9106	1.54196	42.92	-30.1323	5.4	19.6513	10	0.00771423	ar	90	34.0782	3.0635	34.0876	3.07259	0.74701	0.742443
157	2016-11-30	(MB) RLU1_V_AO	19.9118	0.104206	0.113015	0.0371511	0.0371509	19.5841	-0.217176	-0.208361	0.0260114	0.0260113	-0.85749	41.6663	-0.858468	41.6756	-125.296	4.8	16.6598	10	0.00822552	ca	90	33.2673	2.27691	33.2765	2.28583	0.809195	0.803678
158	2016-12-01	(MB) NN2V_V_AO	22.4139	0.0537633	0.0607847	0.0282261	0.0282248	22.0698	-0.282841	-0.275817	0.0206754	0.0206748	2.43451	40.9851	2.42457	40.9948	-100.053	5.1	18.2838	10	0.00653815	ca	90	32.5916	1.6215	32.6012	1.63082	0.738299	0.732269
159	2016-12-01	Carrara	18.1093	-0.338846	-0.333734	0.0191242	0.0191224	17.8492	-0.594279	-0.589166	0.0178901	0.0178893	1.97782	37.5304	1.96742	37.5403	-30.7311	8.1	22.3863	10	0.00565736	ca	90	29.1648	-1.70256	29.1746	-1.69307	0.402053	0.400558
160	2016-12-02	MuStd	23.4442	-0.0121587	-0.00356869	0.0384036	0.0384124	23.1568	-0.292964	-0.284371	0.0261938	0.0261953	1.54597	42.9554	1.53929	42.9648	111.069	7.6	27.9419	10	0.0082832	ar	90	34.1227	3.1066	34.132	3.11568	0.72737	0.723215
161	2016-12-03	Carrara	18.0106	-0.319537	-0.314435	0.021913	0.0219148	17.7386	-0.586604	-0.581502	0.0186813	0.0186826	1.91672	37.4719	1.90646	37.4817	-56.317	4.9	13.5829	10	0.00590756	ca	90	29.1067	-1.75893	29.1165	-1.74944	0.410339	0.408671
162	2016-12-03	MuStd	23.463	0.0539027	0.0624636	0.0398899	0.0398942	23.1314	-0.27014	-0.261575	0.0298889	0.0298911	1.54414	42.9084	1.53747	42.9178	-58.8122	5.9	21.4462	10	0.00945171	ar	90	34.0761	3.06139	34.0854	3.07049	0.752012	0.747346
163	2016-12-03	Carrara	17.86	-0.334471	-0.329327	0.0380279	0.0380285	17.5592	-0.629888	-0.624743	0.0368274	0.0368296	1.79346	37.4571	1.78352	37.4669	-115.767	5	14.0103	10	0.0116458	ca	90	29.0921	-1.77312	29.1018	-1.76368	0.363608	0.362896
164	2016-12-03	(MB) WMF1	24.0619	0.0740118	0.0827411	0.0286921	0.0286926	23.7099	-0.26975	-0.261017	0.017138	0.01714	1.72534	43.3082	1.71835	43.3177	-40.2268	5.5	18.7966	10	0.00541952	ca	90	34.896	3.85672	34.9054	3.86583	0.752433	0.747937
165	2016-12-04	(MB) ChHP1	20.337	0.0399719	0.0464722	0.0217626	0.0217583	20.0374	-0.253722	-0.247219	0.0200292	0.0200314	1.71153	39.6326	1.70284	39.6424	-12.6823	4.4	15.5487	10	0.00633378	ca	90	31.25	0.320142	31.2597	0.3295	0.769738	0.762543
166	2016-12-04	Carrara	17.9349	-0.343381	-0.338304	0.0389211	0.0389184	17.685	-0.588868	-0.583789	0.0154741	0.0154717	1.90976	37.4273	1.8995	37.4371	29.5209	4.8	13.0701	10	0.00489335	ca	90	29.0625	-1.80183	29.0722	-1.79233	0.407896	0.40625
167	2016-12-05	Carrara	18.0223	-0.340214	-0.335088	0.034665	0.0346616	17.7484	-0.60911	-0.603983	0.0204799	0.0204803	1.91178	37.5094	1.90157	37.5193	-47.3113	5	20.7624	10	0.0064763	ca	90	29.1439	-1.72278	29.1537	-1.71332	0.386041	0.384873
168	2016-12-06	Carrara	17.9431	-0.348759	-0.343695	0.0192806	0.0192784	17.6805	-0.606617	-0.601552	0.017734	0.0177347	1.93029	37.4209	1.91997	37.4307	18.6855	4.8	16.0615	10	0.00560798	ca	90	29.0561	-1.808	29.0659	-1.79853	0.388732	0.387447
169	2016-12-06	MuStd	23.4007	0.0140022	0.022567	0.0191506	0.019149	23.089	-0.290559	-0.281991	0.0201281	0.02013	1.52798	42.9027	1.52134	42.9122	36.932	6.3	22.9846	10	0.00636506	ar	90	34.0705	3.05597	34.0798	3.06506	0.729966	0.725734
170	2016-12-06	(MB) SLU1_V_AO	23.9044	0.0826258	0.0913284	0.0584635	0.0584677	23.565	-0.248902	-0.240196	0.0363559	0.036351	1.65087	43.2152	1.64406	43.2247	-53.399	5.5	19.7368	10	0.0114968	ca	90	34.8037	3.76724	34.8131	3.77633	0.774941	0.769978
171	2016-12-06	(MB) WMF1	24.0764	0.119416	0.12812	0.0209097	0.0209107	23.6858	-0.262057	-0.253348	0.0153109	0.0153126	1.72626	43.2753	1.71937	43.2847	-135.161	4.7	15.8906	10	0.00484172	ca	90	34.8633	3.82506	34.8727	3.83414	0.760739	0.756055
172	2016-12-06	MuStd	23.4786	0.0884378	0.0969833	0.0276708	0.02767	23.1166	-0.265293	-0.256744	0.0170103	0.0170101	1.54757	42.8852	1.54087	42.8947	-85.7354	7	17.8564	10	0.00537912	ar	90	34.0531	3.03914	34.0625	3.04826	0.757245	0.75246
173	2016-12-07	(MB) NN2V_V_AO	22.3988	0.0508516	0.0578509	0.0321322	0.0321304	22.0587	-0.28183	-0.274829	0.020305	0.0203027	2.44698	40.9608	2.43706	40.9704	-66.8856	5.2	18.4547	10	0.006421	ca	90	32.5675	1.59804	32.5771	1.60736	0.739391	0.733316	Acid change
174	2016-12-07	(MB) FTD1_D_AO	22.63	0.081689	0.0892407	0.0321199	0.0321212	22.3041	-0.237089	-0.229534	0.0353289	0.0353311	2.02186	41.5776	2.01333	41.5872	-68.3528	4.9	17.2581	10	0.011172	ca	90	33.1793	2.19156	33.1888	2.20079	0.787696	0.781264
175	2016-12-07	Carrara	17.9701	-0.353148	-0.348086	0.0227891	0.0227859	17.7108	-0.607786	-0.602723	0.0192591	0.0192569	1.95556	37.4276	1.94508	37.4375	-29.9001	5.6	18.8821	10	0.00609026	ca	90	29.0628	-1.80152	29.0726	-1.79199	0.38747	0.386207
176	2016-12-08	MuStd	23.4144	0.0744968	0.0830146	0.0194979	0.0194974	23.0561	-0.275642	-0.26712	0.0242519	0.0242515	1.54329	42.8395	1.53664	42.8489	-96.7874	4.3	15.6342	10	0.00766912	ar	90	34.0077	2.99512	34.0171	3.00422	0.746071	0.741476
177	2016-12-08	(MB) DA5.25.1	20.8216	0.00929881	0.0157616	0.0216039	0.0216003	20.5021	-0.303735	-0.29727	0.0230318	0.0230347	2.0589	39.8078	2.04936	39.8175	-101.151	4.6	14.7795	10	0.00728329	ca	90	31.4238	0.488669	31.4334	0.498031	0.715741	0.70956
178	2016-12-08	(MB) SAMID10116	23.0001	0.0850959	0.0934331	0.0199057	0.0199015	22.6445	-0.262543	-0.254202	0.015618	0.0156191	1.46984	42.4867	1.4631	42.4962	-82.6544	4.3	15.0359	10	0.00493885	ca	90	34.0811	3.06629	34.0905	3.07542	0.760214	0.755151
179	2016-12-09	Carrara	17.9573	-0.34962	-0.344551	0.0293821	0.0293796	17.7076	-0.594797	-0.589727	0.0319244	0.031924	1.93429	37.4319	1.924	37.4418	27.8493	5.5	18.1983	10	0.0100954	ca	90	29.067	-1.79738	29.0769	-1.78786	0.401493	0.399964
180	2016-12-09	(MB) D487L_V_AO	16.6621	-0.0491132	-0.0421755	0.0153808	0.015379	16.4493	-0.258403	-0.251462	0.0216932	0.0216931	-0.87165	38.5797	-0.874106	38.5892	93.2828	5.8	20.506	10	0.00685998	ca	90	30.2056	-0.692963	30.215	-0.683832	0.764684	0.758052
181	2016-12-09	(MB) DS431L_V_AO	21.4137	0.0456256	0.0523536	0.0257338	0.0257326	21.0631	-0.297628	-0.290897	0.0197946	0.0197957	2.12771	40.2949	2.11828	40.3046	-165.194	5.3	19.1385	10	0.00625959	ca	90	31.907	0.957398	31.9166	0.966698	0.722335	0.716306
182	2016-12-09	MuStd	23.4776	0.037976	0.0465281	0.036151	0.0361496	23.1355	-0.29633	-0.287774	0.0241204	0.0241208	1.57084	42.913	1.5641	42.9224	-23.1716	6.3	22.8991	10	0.00762755	ar	90	34.0807	3.06586	34.09	3.07491	0.723736	0.719612
183	2016-12-09	(MB) 130_V_AO	16.8746	0.0222944	0.0290399	0.033194	0.0331914	16.5832	-0.264263	-0.257514	0.0241929	0.0241925	-0.6011	38.4542	-0.604277	38.4637	-129.377	4.2	14.6085	10	0.00765045	ca	90	30.0811	-0.813718	30.0906	-0.804568	0.758357	0.751645
184	2016-12-10	(MB) NN2V_V_AO	22.3458	0.00888216	0.0158748	0.0286771	0.0286767	22.0524	-0.278091	-0.271096	0.0137758	0.0137769	2.44991	40.9478	2.43992	40.9575	13.2157	6.6	23.3265	10	0.0043563	ca	90	32.5546	1.58554	32.5642	1.59489	0.743428	0.737267
185	2016-12-10	Carrara	18.0282	-0.366975	-0.36189	0.0238753	0.0238765	17.7946	-0.596425	-0.591338	0.0174181	0.0174183	1.97172	37.484	1.96133	37.4938	63.4625	6.7	22.6427	10	0.00550808	ca	90	29.1187	-1.74726	29.1285	-1.73777	0.399736	0.398259
186	2016-12-10	(MB) RLU1_V_AO	19.6532	0.0514038	0.0601411	0.0322192	0.0322174	19.3615	-0.234686	-0.225944	0.0213055	0.0213061	-0.90816	41.511	-0.909111	41.5203	-26.2123	4.6	15.2068	10	0.00673738	ca	90	33.1132	2.12746	33.1224	2.13638	0.79029	0.785065
187	2016-12-10	(MB) SLU1_V_AO	23.9449	0.117622	0.126333	0.0392313	0.0392424	23.5805	-0.238315	-0.2296	0.0183477	0.0183529	1.64535	43.2253	1.63855	43.2348	-113.601	4.2	15.0359	10	0.00580206	ca	90	34.8137	3.77696	34.8231	3.78605	0.786372	0.781195
188	2016-12-10	MuStd	23.4857	0.0653975	0.0739433	0.0257716	0.0257703	23.1488	-0.263748	-0.255198	0.0140793	0.0140785	1.56499	42.8987	1.55828	42.9082	-53.2645	5	18.0274	10	0.00445227	ar	90	34.0665	3.05212	34.0759	3.06123	0.758913	0.754096
189	2016-12-10	(MB) WMF1	24.0955	0.105835	0.114544	0.0174218	0.0174218	23.748	-0.233591	-0.224878	0.0142033	0.0142055	1.74364	43.2912	1.73666	43.3007	-27.4205	6.5	22.4718	10	0.00449148	ca	90	34.8791	3.84033	34.8885	3.84947	0.791472	0.786193
190	2016-12-11	(MB) ChHP1	20.3356	0.0287834	0.03525	0.0295973	0.0295943	20.0525	-0.24865	-0.242182	0.0164658	0.0164667	1.74965	39.6053	1.74086	39.615	-14.1159	6.3	22.6427	10	0.00520694	ca	90	31.2229	0.293826	31.2325	0.303125	0.775214	0.767876
191	2016-12-11	Carrara	17.9786	-0.361409	-0.356344	0.0450175	0.0450174	17.716	-0.619256	-0.61419	0.0244367	0.0244382	1.95867	37.4414	1.94831	37.4513	-21.5313	5.9	19.9077	10	0.00772757	ca	90	29.0765	-1.78824	29.0863	-1.7787	0.375086	0.374068
192	2016-12-11	MuStd	23.5399	0.0845487	0.0931209	0.0250226	0.0250215	23.1846	-0.26257	-0.253994	0.0217935	0.0217955	1.55996	42.9383	1.55325	42.9477	-119.541	4.4	15.4632	10	0.0068917	ar	90	34.1057	3.0902	34.1151	3.09928	0.760185	0.755371
193	2016-12-12	(MB) D487L_V_AO	16.7373	-0.00168182	0.00524207	0.0299667	0.0299646	16.4831	-0.251747	-0.244819	0.0157969	0.015796	-0.84418	38.5798	-0.846669	38.5893	-59.8732	5.3	18.8821	10	0.00499541	ca	90	30.2057	-0.692886	30.2151	-0.683787	0.771871	0.765084
194	2016-12-12	(MB) SLU1_V_AO	23.9128	0.0984988	0.107182	0.0337293	0.0337278	23.5771	-0.229332	-0.220646	0.0240068	0.0240082	1.66553	43.193	1.65865	43.2024	-44.0816	5.7	20.2496	10	0.0075916	ca	90	34.7817	3.74585	34.791	3.75492	0.79607	0.790674
195	2016-12-12	Carrara	17.9478	-0.375435	-0.370388	0.0176689	0.0176694	17.7132	-0.60589	-0.600842	0.0132156	0.0132159	1.9667	37.4171	1.95632	37.427	58.417	6.5	22.1299	10	0.00417915	ca	90	29.0523	-1.81166	29.0622	-1.80213	0.389517	0.388198
196	2016-12-12	(MB) WMF1	24.0253	0.0712255	0.079948	0.0237721	0.0237704	23.6951	-0.251238	-0.242512	0.0144824	0.0144834	1.71216	43.2875	1.70518	43.2969	49.579	5.5	18.7111	10	0.00457975	ca	90	34.8754	3.83676	34.8848	3.84586	0.772419	0.767526
197	2016-12-12	(MB) RLU1_V_AO	19.7768	0.109171	0.117927	0.0323578	0.0323611	19.4636	-0.198062	-0.1893	0.00987394	0.00987684	-0.88993	41.5579	-0.890891	41.5672	-117.558	4.2	13.4974	10	0.00312242	ca	90	33.1598	2.17263	33.169	2.18155	0.829832	0.823857
198	2016-12-13	MuStd	23.4824	0.0475844	0.0561668	0.0266131	0.0266115	23.1614	-0.266091	-0.257505	0.0175411	0.017541	1.53823	42.94	1.5316	42.9495	17.6393	5.6	19.3949	10	0.00554698	ar	90	34.1074	3.09184	34.1168	3.10093	0.756383	0.751654
199	2016-12-14	Carrara	18	-0.327965	-0.322895	0.029289	0.0292877	17.7218	-0.601145	-0.596073	0.0244939	0.024493	1.94668	37.4405	1.93633	37.4504	-111.127	4.8	16.4889	10	0.00554698	ca	90	29.0755	-1.78913	29.0854	-1.77961	0.39464	0.393246
200	2016-12-14	(MB) ChHP1	20.3249	0.0434283	0.0498946	0.0249178	0.0249169	20.0173	-0.258028	-0.25156	0.0246366	0.0246369	1.73359	39.5953	1.7249	39.605	-52.1168	4.7	16.7453	10	0.00554698	ca	90	31.213	0.284223	31.2227	0.293585	0.765088	0.757948
201	2016-12-14	(MB) SAMID10116	23.028	0.0931487	0.101495	0.0313496	0.0313448	22.6843	-0.242849	-0.2345	0.0210544	0.0210539	1.47114	42.505	1.46447	42.5145	-110.473	4.7	15.8906	10	0.00554698	ca	90	34.0992	3.08388	34.1086	3.09301	0.781477	0.776008
202	2016-12-14	MuStd	23.4018	0.0247208	0.0332555	0.0148571	0.0148562	23.0839	-0.285954	-0.277416	0.017213	0.0172134	1.55065	42.8706	1.54396	42.88	68.1359	4.3	19.4803	10	0.00554698	ar	90	34.0386	3.02508	34.048	3.03415	0.734938	0.730577
203	2016-12-15	Carrara	18.393	-0.301193	-0.295941	0.0299621	0.0299611	18.1008	-0.588016	-0.582763	0.0200469	0.0200472	1.98642	37.7674	1.97611	37.7772	-70.2413	6.7	22.6427	10	0.00554698	ca	90	29.3998	-1.47461	29.4095	-1.46515	0.408815	0.407337
204	2017-01-07	Carrara	17.898	-0.391258	-0.386231	0.0348751	0.0348786	17.6997	-0.586007	-0.58098	0.0261987	0.0262009	1.96781	37.3823	1.95735	37.3922	95.9277	6.5	22.2154	10	0.00828476	ca	90	29.0178	-1.8451	29.0276	-1.83561	0.409524	0.406671
205	2017-01-07	MuStd	23.4888	0.0854818	0.0940351	0.0229473	0.0229479	23.1194	-0.275495	-0.266937	0.0195624	0.0195635	1.54846	42.8976	1.54174	42.907	-112.804	4.7	16.6598	10	0.00618619	ar	90	34.0654	3.05103	34.0747	3.06013	0.750485	0.743909
206	2017-01-08	(MB) DA5.25.1	20.8438	0.0448437	0.0513197	0.0290439	0.029043	20.5086	-0.283565	-0.277087	0.0143676	0.0143674	2.03535	39.8168	2.02593	39.8265	-168.685	6	11.1897	10	0.00454345	ca	90	31.4327	0.497309	31.4423	0.506653	0.741623	0.73301
207	2017-01-08	(MB) RLU1_V_AO	19.7068	0.0781976	0.0868944	0.0302175	0.0302154	19.4182	-0.204893	-0.196191	0.016229	0.0162281	-0.8539	41.4839	-0.854978	41.4932	-101.802	4.9	16.7453	10	0.00513207	ca	90	33.0864	2.10141	33.0956	2.11034	0.828011	0.819881
208	2017-01-08	Carrara	17.9632	-0.32554	-0.320497	0.0339401	0.0339399	17.6882	-0.595583	-0.590538	0.0196859	0.0196871	1.94893	37.3991	1.93855	37.4089	-80.9462	5.2	17.3436	10	0.00622523	ca	90	29.0345	-1.82898	29.0443	-1.81948	0.399009	0.396407	Acid change
209	2017-01-08	(MB) DS288L_V_AO	20.9903	-0.0283529	-0.0214491	0.0277223	0.027718	20.7496	-0.264083	-0.257177	0.0223377	0.0223323	1.74837	40.3194	1.73988	40.3291	71.0151	5.7	19.2239	10	0.00706381	ca	90	31.9313	0.980942	31.9408	0.990229	0.763016	0.754391
210	2017-01-08	(MB) DS431L_V_AO	21.2422	-0.00940563	-0.00273047	0.0295609	0.0295598	20.9958	-0.250689	-0.244012	0.0204984	0.0205005	2.1116	40.1955	2.10217	40.2052	79.5582	5.6	19.9077	10	0.00648216	ca	90	31.8084	0.861718	31.818	0.871066	0.777723	0.768528
211	2017-01-08	MuStd	23.4223	0.0380072	0.0464966	0.0226561	0.0226574	23.1206	-0.256825	-0.248332	0.0234765	0.0234709	1.60005	42.8289	1.5932	42.8384	-24.8543	5.5	20.7624	10	0.00742391	ar	90	33.9973	2.98499	34.0067	2.99409	0.770986	0.763889
212	2017-01-09	(MB) ChHP1	20.2969	0.0529951	0.059441	0.0252185	0.0252178	19.9995	-0.238492	-0.232044	0.0202795	0.0202795	1.73389	39.5574	1.72506	39.5671	-94.9208	4.2	15.2068	10	0.00641294	ca	90	31.1754	0.247727	31.185	0.257049	0.791117	0.781381
213	2017-01-09	(MB) SLU1_V_AO	23.8839	0.101879	0.110541	0.0189793	0.0189779	23.5557	-0.218718	-0.210052	0.0246718	0.0246712	1.66606	43.16	1.65922	43.1695	-130.202	4.8	17.0872	10	0.00780192	ca	90	34.749	3.71413	34.7584	3.72326	0.81283	0.804996
214	2017-01-09	Carrara	17.974	-0.333297	-0.328248	0.0201532	0.0201529	17.7025	-0.59997	-0.594919	0.0209842	0.0209852	1.95492	37.4119	1.94452	37.4218	-57.5263	4.9	16.3179	10	0.00663579	ca	90	29.0472	-1.8166	29.057	-1.80709	0.394192	0.391702
215	2017-01-09	(MB) NN2V_V_AO	22.2919	0.0289172	0.0358748	0.0271221	0.0271201	21.9983	-0.258318	-0.251358	0.0190208	0.0190201	2.44087	40.8824	2.43084	40.8921	-28.5775	5.4	18.9675	10	0.0060149	ca	90	32.4897	1.52263	32.4994	1.53199	0.769347	0.760639
216	2017-01-10	(MB) D487L_V_AO	16.6912	-0.0414674	-0.034504	0.0339209	0.033918	16.4534	-0.275406	-0.268439	0.0255895	0.0255887	-0.88554	38.6147	-0.887913	38.6242	-10.4536	6.3	22.2154	10	0.00809212	ca	90	30.2403	-0.659287	30.2497	-0.650191	0.750583	0.742296
217	2017-01-10	MuStd	23.463	0.0438324	0.0523873	0.0274062	0.027404	23.1271	-0.284385	-0.275826	0.0171061	0.0171074	1.55677	42.9062	1.55005	42.9157	-64.8198	4.8	20.2496	10	0.00540943	ar	90	34.0739	3.05934	34.0833	3.06844	0.740723	0.734364
218	2017-01-10	Carrara	18.0244	-0.372712	-0.367625	0.0258923	0.0258907	17.7783	-0.614351	-0.609263	0.0189599	0.0189608	1.97241	37.4853	1.962	37.4952	6.28378	6.3	21.5316	10	0.00599565	ca	90	29.12	-1.74602	29.1298	-1.73651	0.378401	0.376299
219	2017-01-11	Carrara	18.0036	-0.366375	-0.361334	0.0300682	0.0300667	17.7305	-0.634514	-0.629473	0.0295055	0.029505	2.00221	37.4289	1.99168	37.4388	0.236783	7.7	25.8051	10	0.00933045	ca	90	29.0641	-1.80027	29.0739	-1.79075	0.35626	0.354596
220	2017-01-12	Carrara	17.9114	-0.368972	-0.363919	0.0262231	0.0262251	17.6817	-0.594592	-0.589539	0.0375577	0.0375597	1.9367	37.4034	1.92633	37.4133	61.1947	5	16.6598	10	0.0118768	ca	90	29.0388	-1.82477	29.0486	-1.81525	0.400097	0.39748
221	2017-01-13	MuStd	23.3961	0.00206853	0.0106045	0.0255412	0.0255375	23.1119	-0.275614	-0.267075	0.0207723	0.0207736	1.56188	42.877	1.55511	42.8865	61.0238	6.2	22.3009	10	0.00656878	ar	90	34.045	3.03127	34.0544	3.04036	0.750355	0.743762
222	2017-01-13	Carrara	17.9578	-0.35892	-0.353873	0.0326106	0.0326081	17.7044	-0.607691	-0.602643	0.0211286	0.0211274	1.96181	37.415	1.95145	37.4248	13.1148	6.4	21.8735	10	0.00668144	ca	90	29.0503	-1.81367	29.06	-1.80418	0.385713	0.383407
223	2017-01-14	Carrara	17.9961	-0.360504	-0.355435	0.0206475	0.0206464	17.7492	-0.602957	-0.597888	0.0206591	0.0206593	1.96819	37.4488	1.95772	37.4587	-1.42978	6.9	23.241	10	0.00653297	ca	90	29.0838	-1.78115	29.0936	-1.77161	0.390911	0.388514
224	2017-01-14	(MB) SLU1_V_AO	23.8831	0.0718842	0.080564	0.029319	0.0293163	23.5771	-0.227038	-0.218355	0.0319292	0.031928	1.66877	43.1874	1.66183	43.1968	38.3159	5.4	19.053	10	0.0100969	ca	90	34.7762	3.74052	34.7855	3.74957	0.803694	0.79608
225	2017-01-14	(MB) D487L_V_AO	16.633	-0.0437916	-0.0368312	0.025101	0.0250995	16.4254	-0.248043	-0.24108	0.0279673	0.0279659	-0.91491	38.5876	-0.917246	38.5971	52.1953	5.5	19.3949	10	0.00884405	ca	90	30.2134	-0.685362	30.2229	-0.676239	0.780629	0.771677
226	2017-01-14	Carrara	17.9663	-0.415151	-0.410057	0.0141895	0.0141874	17.7541	-0.623588	-0.618493	0.0186419	0.0186435	1.95612	37.4863	1.9458	37.4962	88.3882	6.9	23.5829	10	0.00589509	ca	90	29.121	-1.745	29.1309	-1.73548	0.368258	0.366386
227	2017-01-14	(MB) NN2V_V_AO	22.331	0.0365404	0.0435181	0.041068	0.0410701	22.0169	-0.270726	-0.263746	0.0160901	0.0160864	2.44028	40.9142	2.43025	40.924	-63.5308	4.7	16.6598	10	0.00508815	ca	90	32.5213	1.55326	32.5309	1.56263	0.755721	0.747336
228	2017-01-14	(MB) DS288L_V_AO	21.0784	0.022499	0.0293965	0.0300086	0.0300084	20.8045	-0.245674	-0.238774	0.0202825	0.0202819	1.77512	40.3293	1.7666	40.339	-67.1107	5.7	20.1641	10	0.0064139	ca	90	31.9411	0.990429	31.9507	0.999748	0.78323	0.774153
229	2017-01-15	MuStd	23.4912	0.0282959	0.0368704	0.0243415	0.02434	23.1722	-0.283391	-0.274813	0.0156048	0.0156058	1.56228	42.9449	1.55561	42.9543	-56.59	5.7	19.9932	10	0.00493467	ar	90	34.1123	3.09656	34.1216	3.10562	0.741815	0.735452
230	2017-01-15	(MB) DS431L_V_AO	21.3216	-0.00990461	-0.00319881	0.0483106	0.0483089	21.0544	-0.271483	-0.264776	0.0383943	0.0383937	2.13003	40.2573	2.12055	40.267	30.3769	7.4	26.8308	10	0.0121413	ca	90	31.8697	0.921229	31.8793	0.930556	0.75489	0.746231
231	2017-01-15	(MB) DA5.25.1	20.7493	-0.0170303	-0.0105864	0.0256789	0.0256782	20.4351	-0.324878	-0.318432	0.0153989	0.0154006	2.04995	39.7711	2.04044	39.7809	-83.3455	4.3	14.7795	10	0.00486957	ca	90	31.3874	0.453395	31.3971	0.462757	0.69626	0.688612
232	2017-01-15	Carrara	17.9403	-0.33469	-0.329638	0.0218297	0.0218291	17.6846	-0.585787	-0.580734	0.0183544	0.018354	1.93299	37.401	1.92265	37.4109	-25.0287	4.5	15.2923	10	0.00580417	ca	90	29.0364	-1.82712	29.0462	-1.8176	0.409766	0.406935
233	2017-01-15	(MB) RLU1_V_AO	19.6146	0.0531241	0.0618266	0.0306137	0.0306159	19.336	-0.220122	-0.211415	0.0194974	0.0194959	-0.89796	41.4605	-0.898963	41.4698	-27.0534	7.4	15.9761	10	0.00616561	ca	90	33.0632	2.07888	33.0724	2.08782	0.811288	0.803533
234	2017-01-15	(MB) ChHP1	20.3284	0.0453311	0.051793	0.020843	0.0208422	20.0245	-0.252521	-0.246057	0.0198641	0.0198678	1.73991	39.5908	1.73115	39.6005	-53.7109	5	18.1128	10	0.00628158	ca	90	31.2085	0.279855	31.2181	0.289185	0.775712	0.766332
235	2017-01-16	Carrara	18.0021	-0.330372	-0.325308	0.029431	0.0294287	17.7187	-0.608627	-0.603561	0.0290565	0.0290555	1.95549	37.4365	1.9451	37.4463	-81.4141	5.1	17.2581	10	0.00918847	ca	90	29.0716	-1.79298	29.0814	-1.78349	0.384686	0.382421
236	2017-01-16	MuStd	23.4017	-0.00513438	0.00341193	0.0198825	0.0198793	23.0933	-0.30651	-0.29796	0.0234664	0.023469	1.55782	42.894	1.55112	42.9035	75.053	6	21.959	10	0.00742072	ar	90	34.0618	3.0476	34.0712	3.05668	0.716429	0.710595
237	2017-01-17	Carrara	18.0852	-0.334952	-0.329857	0.0229989	0.0230016	17.824	-0.59146	-0.586363	0.0292605	0.0292623	1.97562	37.5045	1.96526	37.5144	-57.7831	6.1	20.8479	10	0.00925299	ca	90	29.1391	-1.72753	29.1488	-1.71803	0.403536	0.40089
238	2017-01-18	Carrara	18.0339	-0.350892	-0.34582	0.0238751	0.0238747	17.7927	-0.587726	-0.582654	0.0163638	0.0163647	1.97915	37.466	1.96873	37.4759	-47.4938	6.6	22.8137	10	0.00517469	ca	90	29.1009	-1.76459	29.1106	-1.75509	0.407636	0.404873
239	2017-01-18	MuStd	23.4364	0.0490921	0.0576261	0.0343247	0.034325	23.0926	-0.286918	-0.27838	0.0265163	0.0265197	1.55738	42.8736	1.55068	42.8831	-67.239	4.5	15.7197	10	0.00838518	ca	90	34.4649	3.43858	34.4743	3.4477	0.737942	0.731622
240	2017-01-19	Carrara	18.0374	-0.359609	-0.354522	0.0181887	0.0181872	17.7908	-0.601723	-0.596635	0.0167388	0.0167377	1.97173	37.4856	1.96133	37.4955	-37.3517	5.9	20.2496	10	0.00529326	ca	90	29.1203	-1.7457	29.1301	-1.73621	0.392267	0.389859
241	2017-01-19	Carrara	18.0548	-0.368323	-0.363226	0.0295939	0.0295932	17.8126	-0.606166	-0.601067	0.0192043	0.0192068	1.97617	37.5076	1.96581	37.5174	16.5133	6.5	21.959	10	0.00607292	ca	90	29.1421	-1.72459	29.1519	-1.71512	0.387389	0.385099
242	2017-01-20	(MB) WMF1	23.9181	0.0725345	0.0812013	0.0262429	0.0262398	23.5847	-0.253122	-0.244452	0.0256602	0.0256631	1.70113	43.1899	1.69414	43.1993	-57.4578	4.2	13.7538	10	0.00811448	ca	90	34.7786	3.7429	34.788	3.75194	0.775052	0.768056
243	2017-01-20	(MB) SAMID10116	22.842	0.0439277	0.0522286	0.0304591	0.0304589	22.527	-0.264096	-0.255791	0.016262	0.0162625	1.43463	42.4053	1.428	42.4148	-25.2728	4.3	14.7795	10	0.00514248	ca	90	34.0004	2.98798	34.0097	2.99708	0.763002	0.755879
244	2017-01-20	MuStd	23.4944	0.0181257	0.0266993	0.0314224	0.0314199	23.1642	-0.304471	-0.295894	0.0209801	0.0209802	1.57393	42.9471	1.56715	42.9565	-12.9159	7	25.6342	10	0.00663448	ar	90	34.1145	3.09864	34.1238	3.10773	0.718667	0.712814
245	2017-01-21	Carrara	17.9265	-0.335322	-0.330259	0.0240849	0.0240829	17.6673	-0.58991	-0.584846	0.0202011	0.0202023	1.91436	37.4063	1.90403	37.4161	-77.6106	4.9	16.3179	10	0.00638816	ca	90	29.0416	-1.82205	29.0513	-1.81262	0.405238	0.402519
246	2017-01-21	(MB) DS430L_V_AO	21.1851	-0.00871103	-0.00204586	0.0418289	0.0418265	20.9023	-0.285682	-0.279015	0.0243412	0.0243406	2.08796	40.161	2.07853	40.1707	5.20877	4.2	14.1812	10	0.00769737	ca	90	31.7741	0.828513	31.7838	0.837857	0.739299	0.73094
247	2017-01-21	(MB) DS420L_V_AO	19.4526	-0.0173421	-0.0103677	0.0304139	0.0304192	19.1947	-0.270395	-0.263418	0.0265516	0.0265489	0.74843	39.7515	0.742303	39.7611	-28.6434	4.9	21.1897	10	0.00839636	ca	90	31.3679	0.434497	31.3774	0.443709	0.756085	0.747689
248	2017-01-21	Carrara	18.0428	-0.339998	-0.334901	0.0183375	0.0183366	17.7799	-0.598206	-0.593107	0.0167038	0.0167057	1.95226	37.4901	1.94191	37.5	-76.4437	5.7	19.3949	10	0.00528222	ca	90	29.1248	-1.74134	29.1346	-1.73185	0.396128	0.393647
249	2017-01-22	MuStd	23.3918	0.0292913	0.0378159	0.0320882	0.032084	23.0495	-0.305206	-0.296678	0.0217765	0.021776	1.55261	42.8541	1.54587	42.8635	-45.9616	5	17.9419	10	0.00688633	ar	90	34.0223	3.00921	34.0316	3.01826	0.717861	0.711972
250	2017-01-22	Carrara	18.0207	-0.357727	-0.352675	0.0278312	0.0278289	17.7685	-0.605435	-0.600383	0.0175511	0.0175534	1.99242	37.4468	1.98204	37.4566	-50.4915	7.1	24.0103	10	0.00555014	ca	90	29.0818	-1.78308	29.0915	-1.77362	0.388191	0.385835
251	2017-01-23	Carrara	18.0058	-0.368208	-0.363141	0.0459406	0.0459368	17.7664	-0.603337	-0.598269	0.023829	0.0238274	1.97789	37.4567	1.9675	37.4666	37.6197	6.9	23.9248	10	0.00753538	ca	90	29.0916	-1.77354	29.1015	-1.76399	0.390495	0.388105
252	2017-01-24	Carrara	17.9694	-0.342046	-0.336997	0.0203537	0.0203534	17.7141	-0.592815	-0.587765	0.0171148	0.0171154	1.9579	37.4133	1.9475	37.4232	-57.9162	5.8	19.9932	10	0.00541218	ca	90	29.0486	-1.81528	29.0584	-1.80576	0.402048	0.399385
253	2017-01-24	Carrara	17.9568	-0.382907	-0.37785	0.0338792	0.0338768	17.7352	-0.600549	-0.595491	0.0167098	0.0167076	1.96728	37.4331	1.95687	37.443	35.3779	6.5	21.959	10	0.00528411	ca	90	29.0683	-1.79621	29.078	-1.78671	0.393556	0.391088
254	2017-01-24	MuStd	23.2782	-0.0197988	-0.0113071	0.038686	0.0386857	22.9996	-0.291988	-0.283494	0.0191733	0.0191733	1.54702	42.796	1.54032	42.8055	126.238	6.8	25.2923	10	0.00606313	ar	90	33.9647	2.95337	33.9741	2.96249	0.732374	0.72613
255	2017-01-25	Carrara	18.0165	-0.337404	-0.33235	0.0261012	0.0260988	17.77	-0.579465	-0.57441	0.0179025	0.0179046	1.97873	37.4353	1.96829	37.4452	-19.6347	7.2	24.7795	10	0.00566127	ca	90	29.0704	-1.79414	29.0802	-1.78461	0.416707	0.413725
256	2017-01-25	Carrara	17.893	-0.397222	-0.392187	0.0207736	0.0207695	17.6905	-0.59614	-0.591104	0.019631	0.0196322	1.95779	37.3932	1.94743	37.403	87.8862	6.7	23.0701	10	0.00620786	ca	90	29.0286	-1.83466	29.0384	-1.82517	0.398398	0.395799	Acid change
257	2017-01-26	MuStd	23.4107	0.0214923	0.0300325	0.0349833	0.034982	23.0779	-0.303714	-0.29517	0.0211887	0.021189	1.55357	42.88	1.54684	42.8894	-54.3439	8.1	27.1726	10	0.00670045	ar	90	34.0479	3.03412	34.0573	3.04317	0.719499	0.713591
258	2017-01-27	Carrara	18.0613	-0.349499	-0.344375	0.0208747	0.0208726	17.8172	-0.589142	-0.584017	0.014457	0.0144583	1.94353	37.5268	1.93321	37.5367	-46.8117	8	27.1726	10	0.00457172	ca	90	29.1612	-1.70603	29.171	-1.69657	0.406081	0.403409
259	2017-01-27	Carrara	18.0183	-0.364644	-0.359555	0.0258304	0.0258273	17.7769	-0.601764	-0.596674	0.0171739	0.0171744	1.96122	37.482	1.95084	37.4919	-21.6747	6.6	22.9846	10	0.00543085	ca	90	29.1167	-1.74919	29.1265	-1.73968	0.392221	0.389818
260	2017-01-28	MuStd	23.2531	0.0525608	0.0610479	0.0259312	0.0259311	22.893	-0.299328	-0.290837	0.0196519	0.0196514	1.49115	42.7519	1.48457	42.7614	-150.4	5.2	19.3094	10	0.00621446	ar	90	33.9209	2.91091	33.9303	2.92001	0.724315	0.718244
261	2017-01-29	Carrara	18.0846	-0.355989	-0.350881	0.0187658	0.0187632	17.8362	-0.599924	-0.594815	0.0189774	0.0189768	1.97771	37.5233	1.96731	37.5332	5.78593	7	23.7538	10	0.00600119	ca	90	29.1577	-1.70944	29.1675	-1.69991	0.394242	0.391814
262	2017-01-29	(MB) DS430L_V_AO	21.3044	-0.0307629	-0.0241018	0.0293412	0.02934	21.0161	-0.313072	-0.306409	0.0123726	0.0123753	2.17678	40.2156	2.16716	40.2253	-4.72173	6.1	20.4205	10	0.00391256	ca	90	31.8283	0.881048	31.8379	0.890395	0.709223	0.701522
263	2017-01-29	(MB) DS420L_V_AO	19.3973	-0.0404734	-0.0335313	0.0232026	0.0232016	19.1504	-0.282623	-0.275678	0.0169037	0.0169079	0.76191	39.7065	0.755719	39.7161	24.0025	6.6	23.1556	10	0.00534541	ca	90	31.3233	0.391189	31.3328	0.400415	0.742658	0.734523
264	2017-01-29	Carrara	17.9546	-0.396181	-0.391095	0.0355681	0.0355654	17.7124	-0.63401	-0.628923	0.0242756	0.0242747	1.94625	37.4652	1.93586	37.475	7.86604	6.4	22.1299	10	0.00767661	ca	90	29.1	-1.76539	29.1098	-1.75594	0.356814	0.355187
265	2017-01-30	MuStd	23.4192	0.0347285	0.043264	0.0165095	0.0165062	23.0882	-0.28873	-0.28019	0.0162299	0.0162319	1.55462	42.8738	1.54793	42.8833	-58.7852	5.6	20.506	10	0.00513235	ar	90	34.0418	3.02818	34.0512	3.03731	0.735953	0.729677
266	2017-01-30	(MB) SAMID10116	22.8565	0.0678491	0.0761255	0.0159264	0.0159263	22.5414	-0.240239	-0.231959	0.0230925	0.0230934	1.45275	42.3775	1.44605	42.387	-49.1572	5.5	19.3094	10	0.0073025	ca	90	33.9728	2.96125	33.9822	2.97035	0.789198	0.781471
267	2017-01-30	Carrara	17.9374	-0.375138	-0.370094	0.0278889	0.0278881	17.695	-0.613125	-0.60808	0.0234752	0.023476	1.9657	37.4074	1.95521	37.4173	29.7799	7.2	24.0957	10	0.00742349	ca	90	29.0427	-1.82097	29.0525	-1.81146	0.379747	0.377569
268	2017-02-16	Carrara	17.9921	-0.379489	-0.374403	0.0262325	0.0262297	17.7535	-0.613786	-0.608699	0.0242895	0.0242878	1.95932	37.4727	1.94893	37.4826	-35.0315	7.3	22.7282	10	0.00768102	ca	90	29.1076	-1.75808	29.1174	-1.74856	0.379021	0.376904
269	2017-02-16	Carrara	17.8331	-0.330942	-0.325927	0.0399997	0.0399991	17.5695	-0.589771	-0.584756	0.0353952	0.0353962	1.90294	37.3193	1.89266	37.3293	-73.3942	4.5	13.5829	10	0.0111929	ca	90	28.9554	-1.90568	28.9652	-1.89614	0.40539	0.402616
270	2017-02-16	(MB) PA.01	20.1424	-0.036564	-0.0298965	0.0211161	0.0211146	19.8342	-0.338724	-0.332054	0.0174855	0.0174843	1.47782	39.7453	1.46979	39.7551	-97.6888	4.8	16.4034	10	0.0055294	ca	90	31.3618	0.42859	31.3715	0.437936	0.681055	0.673983
271	2017-02-17	(MB) TC.01	16.5088	-0.113078	-0.107877	0.041547	0.0415477	16.2512	-0.366506	-0.361303	0.0262308	0.0262319	0.78573	36.8661	0.77817	36.8759	-40.7527	4.1	14.6085	10	0.00829492	ca	90	28.5058	-2.34179	28.5155	-2.33237	0.650549	0.642573
272	2017-02-17	MuStd	23.3319	-0.00914704	-0.000593825	0.0332381	0.033236	23.0363	-0.298044	-0.289487	0.0263344	0.0263362	1.51374	42.8717	1.50711	42.8812	28.2391	5.2	18.5402	10	0.00832766	ar	90	34.0397	3.02612	34.0491	3.03524	0.725725	0.719694
273	2017-02-17	(MB) DA5.25.1	20.9333	-0.0374522	-0.0309114	0.0263567	0.0263563	20.6247	-0.339739	-0.333197	0.0250117	0.0250104	2.07882	39.9477	2.06926	39.9574	-60.0093	6.9	23.1556	10	0.00790938	ca	90	31.5625	0.623249	31.5721	0.632576	0.679941	0.672756	Acid change
274	2017-02-18	(MB) FTD1_D_AO	22.5907	0.0176105	0.0251843	0.0210589	0.0210574	22.2948	-0.271755	-0.264179	0.0168433	0.0168441	2.01792	41.6077	2.00935	41.6173	-30.5022	6.7	23.412	10	0.00532631	ca	90	33.2092	2.22055	33.2187	2.22976	0.754591	0.746871
275	2017-02-18	Carrara	17.9818	-0.346055	-0.340974	0.0237982	0.0237966	17.708	-0.614902	-0.60982	0.0187837	0.0187835	1.93509	37.4521	1.92478	37.4619	-118.955	5.1	15.7197	10	0.00593994	ca	90	29.0871	-1.77797	29.0968	-1.7685	0.377795	0.3757
276	2017-02-18	Carrara	17.9207	-0.364718	-0.359653	0.0383526	0.0383518	17.6924	-0.589004	-0.583938	0.0219616	0.0219623	1.92683	37.4181	1.91652	37.428	3.40955	5.7	17.6855	10	0.00694487	ca	90	29.0533	-1.81071	29.0631	-1.80116	0.406232	0.403494
277	2017-02-19	MuStd	23.4735	0.0254012	0.0339833	0.0273124	0.0273125	23.1506	-0.290032	-0.281447	0.021552	0.0215521	1.54688	42.9452	1.54024	42.9547	-38.6433	5.8	21.1043	10	0.00681534	ar	90	34.1126	3.09685	34.122	3.10596	0.734522	0.728328
278	2017-02-19	Carrara	17.9389	-0.362145	-0.357094	0.0125134	0.0125093	17.698	-0.59863	-0.593578	0.0157264	0.0157287	1.94786	37.413	1.93753	37.4229	3.28871	5.7	17.6	10	0.00497313	ca	90	29.0483	-1.81556	29.0581	-1.80608	0.395663	0.393142
279	2017-02-20	Mustd	23.4183	0.027621	0.0361804	0.034	0.0339994	23.0945	-0.288804	-0.280241	0.0198256	0.0198267	1.53662	42.898	1.5299	42.9074	-55.4923	5.8	21.0188	10	0.00626941	ar	90	34.0658	3.05144	34.0751	3.06051	0.73587	0.729623
280	2017-02-20	(MB) FTD1_D_AO	22.5626	0.0210094	0.0285617	0.0300978	0.030096	22.2613	-0.273658	-0.266103	0.0236457	0.0236457	2.01906	41.575	2.01052	41.5846	-12.2438	5.9	20.5915	10	0.00747742	ca	90	33.1767	2.18905	33.1863	2.19828	0.752503	0.744806
281	2017-02-20	(MB) DA5.25.1	20.8457	-0.0691049	-0.0625943	0.0240369	0.0240363	20.5948	-0.314844	-0.308332	0.0265594	0.0265582	2.07635	39.8947	2.06677	39.9045	71.1933	6.5	21.8735	10	0.00839881	ca	90	31.51	0.572311	31.5197	0.581706	0.707277	0.699457
282	2017-02-21	Carrara	17.9886	-0.316328	-0.311263	0.0431452	0.043142	17.7094	-0.590515	-0.585448	0.0171048	0.0171035	1.93811	37.4257	1.92775	37.4356	-111.388	4.1	14.694	10	0.00540901	ca	90	29.0609	-1.80335	29.0707	-1.79386	0.404574	0.401872
283	2017-02-21	Carrara	18.1362	-0.320816	-0.315676	0.0386178	0.0386163	17.8513	-0.600472	-0.595331	0.0212556	0.021255	1.95491	37.5613	1.94462	37.5712	-119.675	4.8	16.4034	10	0.00672162	ca	90	29.1954	-1.67287	29.2052	-1.66336	0.393641	0.39126
284	2017-02-21	MuStd	23.3907	0.0144592	0.0230123	0.0243614	0.0243589	23.0849	-0.284349	-0.275792	0.0263963	0.0263951	1.53528	42.885	1.52859	42.8946	-1.71468	6.2	20.9333	10	0.00834725	ca	90	34.4762	3.44953	34.4857	3.45872	0.740763	0.734401
285	2017-02-22	Carrara	17.9066	-0.341158	-0.336095	0.0320007	0.0320012	17.6217	-0.620875	-0.615811	0.0134694	0.0134698	1.905	37.4014	1.89473	37.4112	-95.4499	4.4	15.8051	10	0.0042594	ca	90	29.0368	-1.82677	29.0465	-1.81733	0.371237	0.369266
286	2017-02-23	MuStd	23.5021	0.0899173	0.0985502	0.0342843	0.0342878	23.1359	-0.267886	-0.259248	0.0234824	0.0234783	1.47628	42.9773	1.46979	42.9868	-132.174	7.5	10.2496	10	0.00742578	ar	90	34.1444	3.12768	34.1538	3.13684	0.758841	0.752166
287	2017-02-23	Carrara	17.9204	-0.333869	-0.328829	0.0377452	0.0377442	17.652	-0.597378	-0.592337	0.0226625	0.0226618	1.9334	37.3799	1.92302	37.3898	-59.0615	4.4	16.0615	10	0.00716652	ca	90	29.0154	-1.84744	29.0253	-1.8379	0.397037	0.394474
288	2017-02-23	Carrara	17.8657	-0.372537	-0.367502	0.0429219	0.0429284	17.6462	-0.588136	-0.583101	0.0191326	0.019131	1.92925	37.3687	1.91888	37.3786	0.83182	4.9	17.8564	10	0.00605025	ca	90	29.0044	-1.85818	29.0142	-1.84866	0.407186	0.404393
289	2017-02-25	MuStd	23.3699	0.000837869	0.0093956	0.023065	0.0230638	23.0652	-0.296951	-0.28839	0.0159356	0.0159367	1.52376	42.8896	1.51716	42.8991	-2.88319	5.8	20.7624	10	0.00503928	ar	90	34.0575	3.04335	34.0668	3.05244	0.726925	0.720872	Acid change
290	2017-02-25	Carrara	17.9394	-0.322193	-0.317164	0.0404815	0.0404792	17.6649	-0.591817	-0.586787	0.0265223	0.0265226	1.95005	37.3707	1.93961	37.3807	-101.145	5	18.0274	10	0.00838708	ca	90	29.0064	-1.85624	29.0163	-1.84664	0.403144	0.400434
291	2017-02-26	Carrara	17.9261	-0.337326	-0.332282	0.0323521	0.0323486	17.6691	-0.589768	-0.584723	0.021303	0.0213008	1.93447	37.3881	1.92412	37.398	-61.3377	4.7	17.1726	10	0.00673661	ca	90	29.0236	-1.83952	29.0334	-1.83001	0.405394	0.402651
292	2017-02-26	MuStd	23.3045	0.0166322	0.0251018	0.0289201	0.0289206	22.986	-0.294626	-0.286153	0.0165761	0.0165789	1.56283	42.7696	1.55604	42.7791	-74.5006	5.3	19.3094	10	0.00524183	ar	90	33.9385	2.92796	33.9479	2.93709	0.729478	0.723274
293	2017-02-27	Carrara	17.8666	-0.341895	-0.336861	0.0406207	0.040621	17.6013	-0.602451	-0.597416	0.027519	0.0275208	1.9101	37.3571	1.89979	37.367	-83.6649	4.3	15.4632	10	0.00870227	ca	90	28.9928	-1.86935	29.0026	-1.85986	0.391467	0.389021
294	2017-02-27	Carrara	17.9115	-0.31602	-0.311	0.0267683	0.0267678	17.6355	-0.587107	-0.582087	0.0352043	0.0352058	1.93546	37.3508	1.92512	37.3607	-97.8486	4.7	16.8308	10	0.0111326	ca	90	28.9866	-1.87541	28.9964	-1.86589	0.408316	0.405482
295	2017-02-28	MuStd	23.4286	0.0594289	0.0679722	0.0337961	0.0337952	23.1008	-0.260945	-0.252399	0.0292427	0.0292426	1.53934	42.8731	1.5326	42.8825	-126.132	4.6	16.9162	10	0.00924737	ar	90	34.0411	3.02747	34.0505	3.03656	0.766461	0.759522
296	2017-03-01	Carrara	17.9259	-0.363016	-0.357952	0.0295561	0.0295545	17.6917	-0.592993	-0.587927	0.0342606	0.0342597	1.92901	37.4194	1.91869	37.4293	26.4061	4.5	18.1983	10	0.0108341	ca	90	29.0547	-1.80937	29.0645	-1.79988	0.401853	0.39921
297	2017-03-02	Carrara	18.0137	-0.359012	-0.353955	0.0200948	0.0200927	17.7687	-0.599578	-0.59452	0.0211387	0.0211393	1.98883	37.4446	1.97833	37.4545	-7.39414	7.6	27.6	10	0.00668466	ca	90	29.0796	-1.7852	29.0894	-1.77565	0.394622	0.39213
298	2017-03-02	Carrara	18.008	-0.397674	-0.392598	0.0399817	0.0399795	17.7963	-0.605473	-0.600396	0.0326988	0.0327002	1.98875	37.4783	1.9783	37.4882	3.04608	8.3	30.9333	10	0.0103403	ca	90	29.1131	-1.75272	29.1229	-1.74322	0.388149	0.38582
299	2017-03-02	MuStd	23.4184	0.00680329	0.0153531	0.0247434	0.0247406	23.0977	-0.30659	-0.298036	0.0145664	0.0145656	1.558	42.8983	1.55129	42.9078	-9.85563	7.4	26.5744	10	0.0046063	ar	90	34.0661	3.05173	34.0755	3.06085	0.716341	0.710514
300	2017-03-02	MuStd	23.2672	0.0129328	0.0214086	0.0315969	0.0316071	22.9831	-0.264787	-0.256308	0.0199311	0.0199328	1.53801	42.7606	1.53123	42.77	26.1203	6.6	24.5231	10	0.00630277	ar	90	33.9295	2.91924	33.9389	2.92836	0.762243	0.755324
301	2017-03-03	Carrara	17.9007	-0.338994	-0.333982	0.0299953	0.029996	17.6402	-0.594742	-0.589729	0.0235719	0.0235723	1.94954	37.3496	1.93917	37.3595	-66.4039	4.4	16.147	10	0.0074541	ca	90	28.9854	-1.87656	28.9952	-1.86708	0.399932	0.397276
302	2017-03-04	Carrara	17.9317	-0.338047	-0.333027	0.0221196	0.0221184	17.6584	-0.606454	-0.601432	0.0177587	0.0177578	1.96081	37.3686	1.9504	37.3785	-75.0029	6	22.2154	10	0.00561578	ca	90	29.0042	-1.8583	29.0141	-1.84875	0.387072	0.384708
303	2017-03-04	MuStd	23.3893	0.0229713	0.0315265	0.0288744	0.0288703	23.0868	-0.272612	-0.264053	0.0252081	0.025209	1.52583	42.8844	1.51914	42.8938	-34.6639	4.6	16.147	10	0.0079715	ar	90	34.0523	3.03831	34.0616	3.04736	0.753651	0.747007
304	2017-03-05	Carrara	17.8831	-0.313378	-0.308361	0.0276571	0.0276561	17.5851	-0.606063	-0.601046	0.0214005	0.0214006	1.9207	37.3342	1.91034	37.3441	-138.041	4.6	15.8906	10	0.00676743	ca	90	28.9701	-1.89138	28.9799	-1.88187	0.387501	0.385123
305	2017-03-05	Carrara	18.022	-0.365039	-0.359944	0.0305254	0.0305224	17.7651	-0.617319	-0.612223	0.0162956	0.0162984	1.95564	37.4915	1.94534	37.5013	-57.4057	5.4	18.5402	10	0.00515313	ca	90	29.1262	-1.74	29.1359	-1.73056	0.375142	0.37312
306	2017-03-06	MuStd	23.3502	0.0266041	0.0351648	0.0370318	0.0370349	23.0376	-0.278924	-0.270359	0.0176656	0.0176626	1.49544	42.8714	1.48884	42.8809	-67.5724	4.8	17.5145	10	0.00558634	ar	90	34.0394	3.02587	34.0488	3.03499	0.74672	0.740234
307	2017-03-07	Carrara	17.9803	-0.327267	-0.322199	0.0261685	0.0261656	17.7133	-0.589435	-0.584365	0.0249719	0.0249734	1.93669	37.4299	1.92634	37.4397	-80.9308	4.7	17.2581	10	0.00789682	ca	90	29.065	-1.79935	29.0748	-1.78985	0.40576	0.403035	Acid change
308	2017-03-07	Carrara	17.903	-0.394387	-0.389329	0.0291893	0.0291865	17.6956	-0.598061	-0.593002	0.0157333	0.0157309	1.939	37.4186	1.92871	37.4284	103.7	5.7	20.5915	10	0.00497531	ca	90	29.0539	-1.81018	29.0636	-1.8007	0.396288	0.393761
309	2017-03-08	MuStd	23.3652	0.0158899	0.024391	0.0233914	0.0233919	23.0793	-0.263509	-0.255005	0.0222273	0.022229	1.56903	42.825	1.56224	42.8344	16.3188	7	25.3778	10	0.0070289	ar	90	33.9933	2.98117	34.0028	2.99031	0.763646	0.756723
310	2017-03-08	Carrara	17.9177	-0.371872	-0.366829	0.031449	0.0314553	17.7112	-0.574627	-0.569583	0.0279738	0.0279722	1.95142	37.3983	1.941	37.4082	28.8941	5.4	19.4803	10	0.00884609	ca	90	29.0337	-1.82968	29.0435	-1.82019	0.42202	0.41891
311	2017-03-09	Carrara	17.8835	-0.359663	-0.354632	0.0353188	0.0353159	17.6451	-0.593771	-0.58874	0.0103053	0.0103054	1.93488	37.3678	1.92453	37.3777	-50.8218	5.7	21.0188	10	0.00325884	ca	90	29.0035	-1.85901	29.0133	-1.84952	0.400998	0.398338
312	2017-03-10	Carrara	17.9231	-0.339466	-0.33442	0.0328745	0.0328714	17.6346	-0.622749	-0.617703	0.023102	0.0231016	1.93112	37.3905	1.92081	37.4004	-108.183	4.4	15.9761	10	0.00730548	ca	90	29.0259	-1.83724	29.0358	-1.82773	0.369179	0.367235
313	2017-03-10	MuStd	23.3786	0.0525691	0.0611007	0.0228134	0.0228123	23.0419	-0.276482	-0.267947	0.0219491	0.0219495	1.52395	42.8452	1.5173	42.8547	-95.1322	4.4	15.7197	10	0.00694093	ar	90	34.0134	3.00063	34.0228	3.00976	0.749401	0.742826
314	2017-03-10	Carrara	17.92	-0.379991	-0.374917	0.0297815	0.0297787	17.718	-0.578357	-0.573281	0.0226207	0.0226218	1.92519	37.4345	1.9149	37.4444	57.761	4.9	18.1983	10	0.00715329	ca	90	29.0697	-1.79484	29.0794	-1.78539	0.417924	0.414938
315	2017-03-11	MuStd	23.4081	0.0472274	0.0557518	0.032089	0.0320876	23.0591	-0.293889	-0.28536	0.0168406	0.0168409	1.55018	42.8544	1.54348	42.8638	-119.384	4	14.3521	10	0.00532547	ar	90	34.0225	3.00948	34.0319	3.01853	0.730288	0.724126
316	2017-03-12	Carrara	17.9384	-0.388521	-0.383446	0.0335959	0.0335945	17.7402	-0.583117	-0.57804	0.0312324	0.0312326	1.9401	37.447	1.9298	37.4568	53.0251	5.6	20.506	10	0.00987655	ca	90	29.082	-1.78288	29.0918	-1.7734	0.412698	0.409827
317	2017-03-12	Carrara	17.9069	-0.337043	-0.332012	0.0493134	0.0493108	17.65	-0.589346	-0.584314	0.0323252	0.0323246	1.93508	37.3681	1.9247	37.378	-88.5439	4.2	14.865	10	0.0102221	ca	90	29.0037	-1.85878	29.0135	-1.84929	0.405857	0.40309
318	2017-03-13	MuStd	23.2837	0.00807007	0.0165516	0.0425291	0.0425259	22.9936	-0.275478	-0.266993	0.0201364	0.0201361	1.54422	42.7759	1.53747	42.7854	5.88262	5	17.7709	10	0.00636767	ca	90	34.368	3.34455	34.3774	3.35367	0.750504	0.74385
319	2017-03-18	MuStd	23.3631	0.0184689	0.0270218	0.0346071	0.0346118	23.0664	-0.271466	-0.26291	0.0298365	0.0298389	1.51561	42.8728	1.50896	42.8823	-6.24853	7.5	27.2581	10	0.00943512	ar	90	34.0408	3.02721	34.0502	3.03632	0.754909	0.748234
320	2017-03-19	Carrara	17.9131	-0.36148	-0.356459	0.0417289	0.0417266	17.6772	-0.593125	-0.588103	0.0237606	0.0237614	1.96295	37.3719	1.95252	37.3817	-37.2077	6.2	21.8735	10	0.00751377	ca	90	29.0075	-1.85513	29.0173	-1.84565	0.401708	0.399022
321	2017-03-22	MuStd	23.4284	0.00501982	0.013625	0.0387112	0.0387093	23.1232	-0.293205	-0.284597	0.0254911	0.0254902	1.50966	42.9577	1.50311	42.9671	-24.6465	7.6	28.1983	10	0.00806098	ar	90	34.125	3.10886	34.1343	3.11792	0.731038	0.724946
322	2017-03-23	Carrara	17.9322	-0.378115	-0.373047	0.047352	0.0473481	17.7189	-0.587654	-0.582586	0.0200557	0.0200552	1.93991	37.4304	1.92956	37.4403	19.8436	6.3	22.3009	10	0.00634216	ca	90	29.0656	-1.79878	29.0754	-1.78926	0.407715	0.404946
323	2017-03-25	Carrara	18.2922	-0.314151	-0.30891	0.0378957	0.037891	18.0069	-0.594282	-0.589041	0.0198169	0.0198161	1.94499	37.7203	1.9348	37.7302	-107.974	5.6	18.8821	10	0.00626667	ca	90	29.3531	-1.51988	29.3629	-1.51038	0.400437	0.398015
324	2017-03-27	MuStd	23.4418	0.0259928	0.0346249	0.0209333	0.020931	23.1137	-0.294631	-0.285995	0.020706	0.0207049	1.47846	42.9803	1.47203	42.9898	-60.6739	5.8	21.4462	10	0.0065478	ca	90	34.5707	3.54118	34.5801	3.55032	0.729473	0.723444
325	2017-03-27	Carrara	17.995	-0.39421	-0.389103	0.0283981	0.0283946	17.7824	-0.602921	-0.597813	0.0278201	0.0278216	1.9474	37.5022	1.93708	37.5121	30.9454	7.8	26.6598	10	0.0087975	ca	90	29.1368	-1.72971	29.1466	-1.72022	0.390951	0.388594

## Sheet: Standards
Carrara						MuStd
#	δ18O (VPDB) G	δ18O (VPDB) B	∆47 G.	∆47 B.		#	δ18O (VPDB) G	δ18O (VPDB) B	∆47 G.	∆47 B.
1	-1.72402	-1.71451	0.408673	0.407257		3	3.23892	3.24803	0.766236	0.761603
2	-1.6568	-1.64731	0.400246	0.399023		7	3.16444	3.17348	0.760767	0.756222
4	-1.64367	-1.6342	0.410952	0.409534		12	3.32007	3.32917	0.766719	0.762122
5	-1.62676	-1.61725	0.411793	0.410371		17	3.13043	3.13952	0.747369	0.743046
10	-1.57448	-1.56501	0.418951	0.417406		20	3.03535	3.04441	0.755912	0.751351
15	-1.89977	-1.89032	0.421575	0.419745		26	3.1061	3.1152	0.773761	0.768901
16	-1.80693	-1.79745	0.385081	0.384051		30	3.03354	3.04266	0.741155	0.736881
18	-1.76403	-1.75451	0.432912	0.430968		35	2.95374	2.96287	0.746704	0.742257
24	-1.6844	-1.67488	0.413167	0.411665		38	3.14647	3.15558	0.773123	0.768301
29	-1.72007	-1.71054	0.431035	0.429168		40	2.85627	2.86536	0.771763	0.766853
31	-1.67233	-1.6628	0.392224	0.391141		44	2.77758	2.78669	0.7658	0.760927
32	-1.7149	-1.70538	0.40565	0.404284		47	3.13952	3.14861	0.755812	0.751328
39	-1.71389	-1.70438	0.413383	0.411862		48	3.56888	3.57797	0.762139	0.757537
41	-1.73	-1.72051	0.4112	0.409711		50	3.17258	3.18166	0.759503	0.75495
45	-1.68129	-1.67181	0.389508	0.388467		53	3.01508	3.02416	0.774585	0.769681
49	-1.67978	-1.67027	0.402071	0.400792		59	3.09871	3.10782	0.747327	0.74298
51	-1.54633	-1.53683	0.427048	0.425349		61	3.15182	3.16096	0.752043	0.747648
56	-1.63377	-1.62432	0.405012	0.403718		63	3.1137	3.12276	0.763889	0.759233
58	-1.66882	-1.65935	0.416512	0.414961		65	3.04834	3.05741	0.76542	0.760694
60	-1.66592	-1.65639	0.421467	0.419837		68	3.11405	3.12311	0.755489	0.750985
62	-1.73106	-1.72158	0.430554	0.428706		70	3.0846	3.09369	0.757392	0.752836
64	-1.63703	-1.62753	0.432557	0.430732		77	3.1333	3.1424	0.741094	0.736896
69	-1.64364	-1.63422	0.432281	0.430459		79	3.13059	3.1397	0.742629	0.738399
71	-1.57929	-1.56982	0.404368	0.40312		81	3.1507	3.15978	0.751384	0.746987
74	-1.61358	-1.60409	0.42619	0.424483		83	3.10533	3.11443	0.768684	0.763937
75	-1.70896	-1.69945	0.407413	0.406021		86	3.09202	3.10107	0.745291	0.740984
76	-1.71308	-1.70358	0.379311	0.378465		90	3.10767	3.11678	0.740678	0.736465
78	-1.76836	-1.75885	0.407795	0.406358		98	3.14847	3.15757	0.767061	0.762369
80	-1.69715	-1.68766	0.409509	0.408083		100	3.08434	3.0934	0.75385	0.749371
82	-1.68554	-1.67606	0.398411	0.397203		111	3.08322	3.09234	0.76563	0.760923
84	-1.67383	-1.6643	0.375909	0.375157		115	2.98713	2.9962	0.770795	0.765953
88	-1.70622	-1.69672	0.399538	0.398304		117	3.01507	3.02409	0.773769	0.768886
92	-1.71593	-1.70642	0.425072	0.423337		122	3.09926	3.10834	0.737962	0.733799
97	-1.69662	-1.68713	0.390575	0.389527		127	3.08612	3.09523	0.774052	0.769181
99	-1.7633	-1.75376	0.414896	0.413337		128	3.01183	3.02095	0.742327	0.738043
103	-1.78169	-1.77219	0.373873	0.37311		131	3.05656	3.06566	0.743624	0.739349
108	-1.84758	-1.83804	0.415265	0.413652		136	3.06359	3.07266	0.727146	0.723176
109	-1.72857	-1.71907	0.411277	0.409819		142	3.05171	3.0608	0.754599	0.750093
110	-1.67523	-1.66573	0.400965	0.399727		148	3.10345	3.11259	0.74798	0.743634
113	-1.77467	-1.76515	0.410198	0.408743		152	3.09612	3.10519	0.754247	0.749786
114	-1.62852	-1.61899	0.391751	0.390714		156	3.05963	3.06872	0.75801	0.753443
116	-1.74907	-1.73959	0.426506	0.424731		160	3.10272	3.1118	0.73837	0.734215
119	-1.68222	-1.67271	0.419852	0.418242		162	3.05752	3.06661	0.763012	0.758346
129	-1.75717	-1.74763	0.409732	0.408282		169	3.0521	3.06119	0.740966	0.736734
133	-1.66469	-1.65521	0.387898	0.386934		172	3.03526	3.04438	0.768245	0.76346
139	-1.73425	-1.72477	0.417918	0.416328		176	2.99124	3.00035	0.757071	0.752476
145	-1.74739	-1.73788	0.433565	0.43167		182	3.06198	3.07104	0.734736	0.730612
151	-1.76402	-1.7545	0.428408	0.426599		188	3.04825	3.05735	0.769913	0.765096
153	-1.69933	-1.6899	0.410049	0.40864		192	3.08633	3.0954	0.771185	0.766371
159	-1.70663	-1.69715	0.413053	0.411558		198	3.08797	3.09705	0.767383	0.762654
161	-1.76301	-1.75352	0.421339	0.419671		202	3.0212	3.03027	0.745938	0.741577
163	-1.7772	-1.76775	0.374608	0.373896		205	3.04715	3.05625	0.761485	0.754909
166	-1.8059	-1.79641	0.418896	0.41725		211	2.98112	2.99022	0.781986	0.774889
167	-1.72686	-1.7174	0.397041	0.395873		217	3.05546	3.06456	0.751723	0.745364
168	-1.81208	-1.80261	0.399732	0.398447		221	3.0274	3.03649	0.761355	0.754762
175	-1.8056	-1.79607	0.39847	0.397207		229	3.09268	3.10175	0.752815	0.746452
179	-1.80146	-1.79194	0.412493	0.410964		236	3.04373	3.05281	0.727429	0.721595
185	-1.75134	-1.74185	0.410736	0.409259		239	3.43448	3.4436	0.748942	0.742622
191	-1.79232	-1.78278	0.386086	0.385068		244	3.09477	3.10386	0.729667	0.723814
195	-1.81574	-1.8062	0.400517	0.399198		249	3.00533	3.01439	0.728861	0.722972
199	-1.79321	-1.78368	0.40564	0.404246		254	2.94949	2.95861	0.743374	0.73713
203	-1.47869	-1.46923	0.419815	0.418337		257	3.03024	3.0393	0.730499	0.724591
204	-1.84918	-1.83969	0.420524	0.417671		260	2.90704	2.91614	0.735315	0.729244
208	-1.83306	-1.82355	0.410009	0.407407		265	3.02431	3.03343	0.746953	0.740677
214	-1.82068	-1.81117	0.405192	0.402702		272	3.02224	3.03137	0.736725	0.730694
218	-1.7501	-1.74059	0.389401	0.387299		277	3.09297	3.10209	0.745522	0.739328
219	-1.80434	-1.79483	0.36726	0.365596		279	3.04757	3.05664	0.74687	0.740623
220	-1.82885	-1.81933	0.411097	0.40848		284	3.44543	3.45462	0.751763	0.745401
222	-1.81775	-1.80826	0.396713	0.394407		286	3.12381	3.13296	0.769841	0.763166
223	-1.78523	-1.77568	0.401911	0.399514		289	3.03948	3.04857	0.737925	0.731872
226	-1.74908	-1.73955	0.379258	0.377386		292	2.92409	2.93322	0.740478	0.734274
232	-1.8312	-1.82168	0.420766	0.417935		295	3.0236	3.03269	0.777461	0.770522
235	-1.79706	-1.78756	0.395686	0.393421		299	3.04785	3.05697	0.727341	0.721514
237	-1.7316	-1.72211	0.414536	0.41189		300	2.91537	2.92448	0.773243	0.766324
238	-1.76867	-1.75916	0.418636	0.415873		303	3.03444	3.04348	0.764651	0.758007
240	-1.74978	-1.74028	0.403267	0.400859		306	3.022	3.03112	0.75772	0.751234
241	-1.72867	-1.7192	0.398389	0.396099		309	2.9773	2.98643	0.774646	0.767723
245	-1.82613	-1.8167	0.416238	0.413519		313	2.99675	3.00588	0.760401	0.753826
248	-1.74542	-1.73593	0.407128	0.404647		315	3.0056	3.01466	0.741288	0.735126
250	-1.78716	-1.7777	0.399191	0.396835		318	3.34045	3.34957	0.761504	0.75485
251	-1.77761	-1.76807	0.401495	0.399105		319	3.02334	3.03245	0.765909	0.759234
252	-1.81935	-1.80984	0.413048	0.410385		321	3.10498	3.11405	0.742038	0.735946
253	-1.80028	-1.79079	0.404556	0.402088		324	3.53708	3.54621	0.740473	0.734444
255	-1.79822	-1.78869	0.427707	0.424725		AVERAGE	3.08311	3.09221	0.754178	0.748948
256	-1.83873	-1.82925	0.409398	0.406799		STDEV	0.125066	0.125071	0.0139222	0.013862
258	-1.71011	-1.70064	0.417081	0.414409		STERR	0.0137277	0.0137283	0.00152817	0.00152155
259	-1.75327	-1.74376	0.403221	0.400818
261	-1.71351	-1.70398	0.405242	0.402814
264	-1.76947	-1.76002	0.367814	0.366187
267	-1.82505	-1.81553	0.390747	0.388569
268	-1.76216	-1.75264	0.390021	0.387904
269	-1.90976	-1.90022	0.41639	0.413616
275	-1.78205	-1.77258	0.388795	0.3867
276	-1.81478	-1.80524	0.417232	0.414494
278	-1.81963	-1.81015	0.406663	0.404142
282	-1.80742	-1.79793	0.415574	0.412872
283	-1.67695	-1.66744	0.404641	0.40226
285	-1.83084	-1.82141	0.382237	0.380266
287	-1.85152	-1.84197	0.408037	0.405474
288	-1.86226	-1.85274	0.418186	0.415393
290	-1.86031	-1.85072	0.414144	0.411434
291	-1.8436	-1.83409	0.416394	0.413651
293	-1.87343	-1.86394	0.402467	0.400021
294	-1.87949	-1.86996	0.419316	0.416482
296	-1.81345	-1.80396	0.412853	0.41021
297	-1.78928	-1.77973	0.405622	0.40313
298	-1.75679	-1.7473	0.399149	0.39682
301	-1.88064	-1.87116	0.410932	0.408276
302	-1.86237	-1.85283	0.398072	0.395708
304	-1.89545	-1.88595	0.398501	0.396123
305	-1.74407	-1.73464	0.386142	0.38412
307	-1.80343	-1.79393	0.41676	0.414035
308	-1.81425	-1.80478	0.407288	0.404761
310	-1.83376	-1.82426	0.43302	0.42991
311	-1.86309	-1.8536	0.411998	0.409338
312	-1.84132	-1.83181	0.380179	0.378235
314	-1.79892	-1.78947	0.428924	0.425938
316	-1.78696	-1.77748	0.423698	0.420827
317	-1.86285	-1.85337	0.416857	0.41409
320	-1.85921	-1.84973	0.412708	0.410022
322	-1.80286	-1.79333	0.418715	0.415946
323	-1.52395	-1.51446	0.411437	0.409015
325	-1.73379	-1.7243	0.401951	0.399594
AVERAGE	-1.75655	-1.74706	0.407471	0.40552
STDEV	0.0810149	0.0810092	0.0145063	0.0142724
STERR	0.00730486	0.00730435	0.00130799	0.0012869

## Sheet: Results
#	Date	Sample	δ13C (VPDB) G.	δ13C (VPDB) B.	δ18O (SMOW) G.	δ18O (VPDB) G.	δ18O (SMOW) B.	δ18O (VPDB) B.	∆47 G.	∆47 B.
11	2016-07-23	(MB) 130_V_A	-0.68047	-0.683196	30.5871	-0.322873	30.5965	-0.313798	0.783292	0.77646
14	2016-07-25	(MB) 130_V_A	-0.69981	-0.702507	30.5992	-0.311134	30.6087	-0.301987	0.780567	0.773807
19	2016-08-05	(MB) 130_V_A	-0.67587	-0.678751	30.3705	-0.533052	30.3799	-0.523922	0.736056	0.730005
27	2016-08-10	(MB) 130_V_A	-0.71377	-0.716496	30.423	-0.482133	30.4324	-0.473019	0.821664	0.813992
36	2016-08-26	(MB) 130_V_A	-0.6884	-0.691171	30.4467	-0.459089	30.4561	-0.449947	0.778786	0.771955
46	2016-09-01	(MB) 130_V_A	-0.67264	-0.675418	30.49	-0.417119	30.4994	-0.408002	0.762225	0.755738
57	2016-09-11	(MB) 130_V_A	-0.63766	-0.640444	30.6149	-0.295941	30.6243	-0.286823	0.769421	0.762858
104	2016-10-23	(MB) 130_V_AO	-0.56848	-0.571773	30.1775	-0.720264	30.1869	-0.711082	0.738638	0.732365
143	2016-11-27	(MB) 130_V_AO	-0.55893	-0.562201	30.2104	-0.688348	30.2198	-0.679154	0.787855	0.780638
183	2016-12-09	(MB) 130_V_AO	-0.6011	-0.604277	30.0769	-0.8178	30.0863	-0.808651	0.758357	0.751645
N	10	AVERAGE	-0.649713	-0.652623	30.3996	-0.504775	30.409	-0.495638	0.771686	0.764946
		STDEV	0.0553919	0.0551659	0.189283	0.183606	0.189258	0.183582	0.0250715	0.0246316
		STERROR	0.0175165	0.017445	0.0598564	0.0580612	0.0598487	0.0580537	0.0079283	0.00778921
9	2016-07-23	(MB) 143_V_A	0.13593	0.131416	31.2832	0.352348	31.2927	0.361559	0.746935	0.740906
23	2016-08-09	(MB) 143_V_A	0.14473	0.140154	31.1706	0.243044	31.18	0.252159	0.771926	0.76533
28	2016-08-09	(MB) 143_V_A	0.15996	0.155296	31.219	0.290037	31.2284	0.299167	0.739025	0.733098
34	2016-08-26	(MB) 143_V_A	0.1912	0.186413	31.1412	0.214544	31.1506	0.223729	0.754968	0.748666
42	2016-08-31	(MB) 143_V_A	0.05778	0.0532058	30.8467	-0.0711467	30.8561	-0.0619887	0.770565	0.763826
55	2016-09-10	(MB) 143_V_A	0.1564	0.151726	31.0807	0.15588	31.0901	0.165022	0.764337	0.757826
89	2016-10-17	(MB) 143_V_AO	-0.31028	-0.313951	30.7151	-0.198799	30.7245	-0.189655	0.751517	0.745226
102	2016-10-23	(MB) 143_V_AO	-0.34407	-0.347635	30.712	-0.201773	30.7214	-0.192667	0.742607	0.736502
120	2016-10-29	(MB) 143_V_AO	-0.3355	-0.339106	30.705	-0.208537	30.7144	-0.199419	0.775903	0.769141
149	2016-11-28	(MB) 143_V_AO	-0.3097	-0.313289	30.8788	-0.0400105	30.8882	-0.0308856	0.758159	0.751845
N	10	AVERAGE	-0.045355	-0.0495769	30.9752	0.0535588	30.9846	0.0627021	0.757594	0.751237
		STDEV	0.243112	0.242581	0.227781	0.220949	0.227799	0.220966	0.0128302	0.0125478
		STERROR	0.0768786	0.0767109	0.0720307	0.0698703	0.0720362	0.0698757	0.00405727	0.00396796
165	2016-12-04	(MB) ChHP1	1.71153	1.70284	31.2458	0.316055	31.2555	0.325413	0.769738	0.762543
190	2016-12-11	(MB) ChHP1	1.74965	1.74086	31.2187	0.289739	31.2283	0.299038	0.775214	0.767876
200	2016-12-14	(MB) ChHP1	1.73359	1.7249	31.2088	0.280136	31.2184	0.289498	0.765088	0.757948
212	2017-01-09	(MB) ChHP1	1.73389	1.72506	31.1712	0.243641	31.1808	0.252962	0.791117	0.781381
234	2017-01-15	(MB) ChHP1	1.73991	1.73115	31.2043	0.275768	31.2139	0.285098	0.775712	0.766332
N	5	AVERAGE	1.73371	1.72496	31.2098	0.281068	31.2194	0.290402	0.775374	0.767216
		STDEV	0.0140047	0.0139662	0.0269276	0.0261199	0.0269378	0.0261299	0.00981759	0.00879739
		STERROR	0.00626308	0.00624588	0.0120424	0.0116812	0.0120469	0.0116856	0.00439056	0.00393431
96	2016-10-21	(MB) D487L_V_AO	-0.81973	-0.822266	30.3262	-0.575956	30.3356	-0.566848	0.753353	0.747
138	2016-11-26	(MB) D487L_V_AO	-0.91604	-0.918411	30.2066	-0.692043	30.2159	-0.682959	0.767444	0.760781
180	2016-12-09	(MB) D487L_V_AO	-0.87165	-0.874106	30.2014	-0.697046	30.2108	-0.687914	0.764684	0.758052
193	2016-12-12	(MB) D487L_V_AO	-0.84418	-0.846669	30.2015	-0.696969	30.2109	-0.68787	0.771871	0.765084
216	2017-01-10	(MB) D487L_V_AO	-0.88554	-0.887913	30.2361	-0.66337	30.2455	-0.654274	0.750583	0.742296
225	2017-01-14	(MB) D487L_V_AO	-0.91491	-0.917246	30.2092	-0.689445	30.2186	-0.680322	0.780629	0.771677
N	6	AVERAGE	-0.875342	-0.877769	30.2302	-0.669138	30.2396	-0.660031	0.764761	0.757482
		STDEV	0.0384795	0.0384041	0.0488066	0.0473428	0.0488055	0.0473417	0.01132	0.0110542
		STERROR	0.0157092	0.0156784	0.0199252	0.0193276	0.0199248	0.0193272	0.00462137	0.00451286
177	2016-12-08	(MB) DA5.25.1	2.0589	2.04936	31.4196	0.484581	31.4292	0.493944	0.715741	0.70956
206	2017-01-08	(MB) DA5.25.1	2.03535	2.02593	31.4285	0.493221	31.4381	0.502565	0.741623	0.73301
231	2017-01-15	(MB) DA5.25.1	2.04995	2.04044	31.3832	0.449307	31.3929	0.45867	0.69626	0.688612
273	2017-02-17	(MB) DA5.25.1	2.07882	2.06926	31.5583	0.619161	31.5679	0.628488	0.679941	0.672756
281	2017-02-20	(MB) DA5.25.1	2.07635	2.06677	31.5058	0.568223	31.5155	0.577618	0.707277	0.699457
N	5	AVERAGE	2.05987	2.05035	31.4591	0.522899	31.4687	0.532257	0.708168	0.700679
		STDEV	0.0182433	0.0181832	0.071211	0.0690752	0.0712055	0.0690698	0.0229999	0.0226438
		STERROR	0.00815865	0.00813178	0.0318465	0.0308914	0.0318441	0.030889	0.0102859	0.0101266
94	2016-10-20	(MB) DA5.25.2	1.81303	1.80426	31.6791	0.736374	31.6887	0.74566	0.705795	0.700084
107	2016-10-24	(MB) DA5.25.2	1.74211	1.73352	31.5155	0.577595	31.5251	0.586948	0.678788	0.673528
126	2016-10-30	(MB) DA5.25.2	1.76843	1.7597	31.5883	0.64821	31.5979	0.657523	0.675427	0.670271
144	2016-11-27	(MB) DA5.25.2	1.72358	1.71509	31.595	0.654752	31.6046	0.664086	0.69709	0.691532
N	4	AVERAGE	1.76179	1.75314	31.5945	0.654233	31.6041	0.663554	0.689275	0.683854
		STDEV	0.0388026	0.0386845	0.0669625	0.0649542	0.0669343	0.0649268	0.0145572	0.0143004
		STERROR	0.0194013	0.0193423	0.0334813	0.0324771	0.0334671	0.0324634	0.00727859	0.00715021
85	2016-10-16	(MB) DS288L_V_AO	1.78104	1.7726	32.0192	1.06626	32.0288	1.07557	0.710917	0.70534
105	2016-10-23	(MB) DS288L_V_AO	1.75356	1.7451	31.9379	0.987331	31.9474	0.996595	0.697456	0.692102
123	2016-10-30	(MB) DS288L_V_AO	1.78655	1.77804	32.0034	1.05091	32.0129	1.06017	0.723861	0.718019
141	2016-11-27	(MB) DS288L_V_AO	1.7611	1.75266	31.9776	1.02591	31.9873	1.03526	0.753683	0.747255
209	2017-01-08	(MB) DS288L_V_AO	1.74837	1.73988	31.9271	0.976853	31.9366	0.98614	0.763016	0.754391
228	2017-01-14	(MB) DS288L_V_AO	1.77512	1.7666	31.9368	0.98634	31.9464	0.995658	0.78323	0.774153
N	6	AVERAGE	1.76762	1.75915	31.967	1.0156	31.9766	1.0249	0.738694	0.731876
		STDEV	0.0155271	0.0155181	0.0387831	0.0376199	0.0387858	0.0376226	0.0331416	0.0316509
		STERROR	0.0063389	0.00633525	0.0158331	0.0153582	0.0158343	0.0153593	0.01353	0.0129214
94	2016-10-19	(MB) DS420L_V_AO	0.78118	0.775005	31.3759	0.442226	31.3854	0.451435	0.740314	0.734188
119	2016-10-29	(MB) DS420L_V_AO	0.76228	0.756087	31.3742	0.440609	31.3837	0.449802	0.73434	0.728339
135	2016-11-26	(MB) DS420L_V_AO	0.7268	0.720723	31.3224	0.390345	31.3319	0.39956	0.761976	0.755417
141	2016-11-27	(MB) DS420L_V_AO	0.74182	0.735686	31.3104	0.378645	31.3199	0.387869	0.745275	0.739028
249	2017-01-21	(MB) DS420L_V_AO	0.74843	0.742303	31.3637	0.43041	31.3732	0.439621	0.756085	0.747689
265	2017-01-29	(MB) DS420L_V_AO	0.76191	0.755719	31.3191	0.387102	31.3286	0.396328	0.742658	0.734523
N	6	AVERAGE	0.753737	0.747587	31.3443	0.411556	31.3538	0.420769	0.746775	0.739864
		STDEV	0.0189139	0.018875	0.0301313	0.0292276	0.030121	0.0292176	0.010328	0.00997397
		STERROR	0.00772157	0.00770568	0.012301	0.0119321	0.0122968	0.011928	0.00421638	0.00407185
91	2016-10-19	(MB) DS430L_V_AO	2.23329	2.22362	31.9296	0.979325	31.9392	0.988641	0.722723	0.716656
106	2016-10-24	(MB) DS430L_V_AO	2.19379	2.18413	31.862	0.913781	31.8716	0.923085	0.706153	0.700385
132	2016-11-25	(MB) DS430L_V_AO	2.17599	2.1664	31.9037	0.954184	31.9133	0.963534	0.73996	0.733568
150	2016-11-28	(MB) DS430L_V_AO	2.17732	2.16772	31.9358	0.98531	31.9454	0.994631	0.748647	0.742106
246	2017-01-21	(MB) DS430L_V_AO	2.08796	2.07853	31.7699	0.824424	31.7795	0.833768	0.739299	0.73094
262	2017-01-29	(MB) DS430L_V_AO	2.17678	2.16716	31.8241	0.876959	31.8337	0.886306	0.709223	0.701522
N	6	AVERAGE	2.17419	2.16459	31.8708	0.92233	31.8805	0.931661	0.727667	0.720863
		STDEV	0.0476074	0.0475217	0.0651145	0.0631615	0.0651057	0.063153	0.01763	0.0174663
		STERROR	0.0194356	0.0194006	0.0265829	0.0257856	0.0265793	0.0257821	0.0071974	0.0071306
96	2016-10-20	(MB) DS431L_V_AO	2.16459	2.15508	31.9598	1.00857	31.9694	1.01789	0.713075	0.706799
125	2016-10-30	(MB) DS431L_V_AO	2.16143	2.15197	31.9717	1.02013	31.9813	1.02947	0.697969	0.691996
136	2016-11-26	(MB) DS431L_V_AO	2.15959	2.15008	31.9713	1.01978	31.9809	1.0291	0.680631	0.674998
183	2016-12-09	(MB) DS431L_V_AO	2.12771	2.11828	31.9028	0.953308	31.9124	0.962609	0.699335	0.693306
212	2017-01-08	(MB) DS431L_V_AO	2.1116	2.10217	31.8041	0.857629	31.8138	0.866977	0.754723	0.745528
232	2017-01-15	(MB) DS431L_V_AO	2.13003	2.12055	31.8655	0.91714	31.8751	0.926467	0.73189	0.723231
N	6	AVERAGE	2.14249	2.13302	31.9125	0.962758	31.9221	0.972085	0.712937	0.705976
		STDEV	0.0222146	0.0221872	0.0681712	0.0661266	0.0681657	0.0661213	0.0266762	0.0252125
		STERROR	0.00906906	0.00905789	0.0278308	0.0269961	0.0278285	0.0269939	0.0108905	0.0102929
154	2016-11-30	(MB) FTD1_D_AO	1.9912	1.98277	33.2177	2.22882	33.2272	2.23804	0.748525	0.742899
174	2016-12-07	(MB) FTD1_D_AO	2.02186	2.01333	33.1751	2.18746	33.1846	2.1967	0.787696	0.781264
274	2017-02-18	(MB) FTD1_D_AO	2.01792	2.00935	33.205	2.21645	33.2145	2.22567	0.754591	0.746871
280	2017-02-20	(MB) FTD1_D_AO	2.01906	2.01052	33.1725	2.18496	33.182	2.19419	0.752503	0.744806
N	4	AVERAGE	2.01251	2.00399	33.1926	2.20442	33.2021	2.21365	0.760829	0.75396
		STDEV	0.0143028	0.0142473	0.0223199	0.0216505	0.0223135	0.0216443	0.0180873	0.018275
		STERROR	0.00715139	0.00712367	0.01116	0.0108252	0.0111568	0.0108221	0.00904366	0.00913748
6	2016-07-21	(MB) GS183L_V_A	1.18915	1.18211	31.9333	0.982934	31.9428	0.992149	0.743556	0.73755
13	2016-07-25	(MB) GS183L_V_A	1.1596	1.15256	31.6443	0.702582	31.6538	0.711807	0.758848	0.752367
22	2016-08-09	(MB) GS183L_V_A	1.12826	1.12123	31.5241	0.586004	31.5337	0.595245	0.767723	0.761006
33	2016-08-26	(MB) GS183L_V_A	1.19707	1.18993	31.6062	0.665587	31.6157	0.674867	0.749885	0.743538
54	2016-09-10	(MB) GS183L_V_A	1.15417	1.14703	31.5301	0.591806	31.5396	0.60105	0.750261	0.743878
N	5	AVERAGE	1.16565	1.15857	31.6476	0.705783	31.6571	0.715024	0.754055	0.747668
		STDEV	0.0278652	0.027844	0.167644	0.162616	0.16763	0.162602	0.00937851	0.0091349
		STERROR	0.0124617	0.0124522	0.0749728	0.0727241	0.0749664	0.0727179	0.0041942	0.00408525
137	2016-11-26	(MB) NN2V_V_AO	2.41651	2.4066	32.5798	1.60998	32.5894	1.61932	0.740908	0.734831
158	2016-12-01	(MB) NN2V_V_AO	2.43451	2.42457	32.5874	1.61741	32.597	1.62673	0.738299	0.732269
173	2016-12-07	(MB) NN2V_V_AO	2.44698	2.43706	32.5632	1.59395	32.5728	1.60327	0.739391	0.733316
184	2016-12-10	(MB) NN2V_V_AO	2.44991	2.43992	32.5503	1.58145	32.56	1.5908	0.743428	0.737267
215	2017-01-09	(MB) NN2V_V_AO	2.44087	2.43084	32.4855	1.51854	32.4951	1.5279	0.769347	0.760639
227	2017-01-14	(MB) NN2V_V_AO	2.44028	2.43025	32.5171	1.54917	32.5267	1.55854	0.755721	0.747336
N	6	AVERAGE	2.43818	2.42821	32.5472	1.57842	32.5569	1.58776	0.747849	0.740943
		STDEV	0.0119142	0.0118912	0.0391402	0.0379663	0.0391251	0.0379517	0.0122848	0.0110732
		STERROR	0.00486394	0.00485458	0.0159789	0.0154997	0.0159728	0.0154937	0.00501525	0.00452062
66	2016-09-16	(MB) PA.01	1.52159	1.51343	31.3323	0.399909	31.3419	0.409207	0.712276	0.706342
72	2016-09-18	(MB) PA.01	1.53628	1.52822	31.4097	0.474969	31.4193	0.484292	0.707169	0.701376
112	2016-10-26	(MB) PA.01	1.49541	1.48733	31.3339	0.401496	31.3435	0.410818	0.702019	0.696298
147	2016-11-28	(MB) PA.01	1.49553	1.48745	31.3137	0.381926	31.3234	0.391254	0.715848	0.709843
270	2017-02-16	(MB) PA.01	1.47782	1.46979	31.3576	0.424502	31.3673	0.433848	0.681055	0.673983
N	5	AVERAGE	1.50533	1.49724	31.3494	0.41656	31.3591	0.425884	0.703673	0.697568
		STDEV	0.0233103	0.0232889	0.0370929	0.0359804	0.0370961	0.0359835	0.0136816	0.0141425
		STERROR	0.00951637	0.00950764	0.0151431	0.0146889	0.0151444	0.0146902	0.00558548	0.00577367
8	2016-07-22	(MB) S006L_V_A	0.16798	0.163251	30.9531	0.0321147	30.9625	0.0412706	0.779381	0.772487
21	2016-08-05	(MB) S006L_V_A	0.17534	0.170472	30.7248	-0.189351	30.7343	-0.180131	0.74555	0.739166
25	2016-08-09	(MB) S006L_V_A	0.15919	0.15436	30.8612	-0.05707	30.8706	-0.0479016	0.755063	0.748591
37	2016-08-28	(MB) S006L_V_A	0.19478	0.189858	30.8334	-0.0840207	30.8429	-0.07478	0.781137	0.774122
43	2016-08-31	(MB) S006L_V_A	0.11287	0.108089	30.6454	-0.266373	30.6549	-0.257194	0.769819	0.762938
52	2016-09-10	(MB) S006L_V_A	0.19318	0.188363	31.011	0.088258	31.0204	0.0974357	0.786463	0.779459
87	2016-10-17	(MB) S006L_V_AO	0.04849	0.0438865	30.7591	-0.156059	30.7686	-0.146881	0.742053	0.735817
101	2016-10-23	(MB) S006L_V_AO	0.03936	0.0348336	30.7664	-0.148987	30.7758	-0.139832	0.714152	0.708468
121	2016-10-29	(MB) S006L_V_AO	-0.01397	-0.0184365	30.6908	-0.222334	30.7003	-0.213132	0.740993	0.734761
130	2016-11-24	(MB) S006L_V_AO	-0.13919	-0.143322	30.6636	-0.248669	30.673	-0.239552	0.745109	0.738833
N	10	AVERAGE	0.093803	0.0891355	30.7909	-0.125249	30.8003	-0.11607	0.755972	0.749464
		STDEV	0.109433	0.109198	0.122412	0.11874	0.122413	0.118741	0.0228454	0.022416
		STERROR	0.0346057	0.0345314	0.0387099	0.0375489	0.0387103	0.0375492	0.00722435	0.00708856
178	2016-12-08	(MB) SAMID10116	1.46984	1.4631	34.0769	3.06219	34.0863	3.07132	0.760214	0.755151
201	2016-12-14	(MB) SAMID10116	1.47114	1.46447	34.095	3.07978	34.1044	3.08891	0.781477	0.776008
243	2017-01-20	(MB) SAMID10116	1.43463	1.428	33.9961	2.98388	34.0055	2.99298	0.763002	0.755879
266	2017-01-30	(MB) SAMID10116	1.45275	1.44605	33.9686	2.95715	33.978	2.96625	0.789198	0.781471
N	4	AVERAGE	1.45709	1.45041	34.0342	3.02075	34.0435	3.02987	0.773473	0.767127
		STDEV	0.0171586	0.0171261	0.0612981	0.0594596	0.0613154	0.0594764	0.0141042	0.0135964
		STERROR	0.0085793	0.00856304	0.0306491	0.0297298	0.0306577	0.0297382	0.00705209	0.00679818
67	2016-09-16	(MB) TC.01	0.84412	0.836414	28.5947	-2.25554	28.6044	-2.24613	0.665218	0.658722
73	2016-09-18	(MB) TC.01	0.8413	0.833636	28.602	-2.24847	28.6117	-2.23912	0.664963	0.658476
125	2016-10-30	(MB) TC.01	0.82421	0.816524	28.4822	-2.36468	28.4919	-2.35527	0.68665	0.67967
146	2016-11-27	(MB) TC.01	0.81419	0.806519	28.5463	-2.3025	28.556	-2.29307	0.686547	0.679617
271	2017-02-17	(MB) TC.01	0.78573	0.77817	28.5016	-2.34587	28.5113	-2.33645	0.650549	0.642573
N	5	AVERAGE	0.82191	0.814252	28.5454	-2.30341	28.5551	-2.29401	0.670785	0.663812
		STDEV	0.0236809	0.0236314	0.0537363	0.0521246	0.0537189	0.0521078	0.0156085	0.0158646
		STERROR	0.0105904	0.0105683	0.0240316	0.0233108	0.0240238	0.0233033	0.00698034	0.00709485
164	2016-12-03	(MB) WMF1	1.72534	1.71835	34.8917	3.85262	34.9011	3.86173	0.752433	0.747937
171	2016-12-06	(MB) WMF1	1.72626	1.71937	34.8591	3.82096	34.8685	3.83004	0.760739	0.756055
189	2016-12-10	(MB) WMF1	1.74364	1.73666	34.8748	3.83623	34.8843	3.84536	0.791472	0.786193
196	2016-12-12	(MB) WMF1	1.71216	1.70518	34.8712	3.83266	34.8805	3.84176	0.772419	0.767526
242	2017-01-20	(MB) WMF1	1.70113	1.69414	34.7744	3.7388	34.7837	3.74784	0.775052	0.768056
N	5	AVERAGE	1.72171	1.71474	34.8543	3.81625	34.8636	3.82535	0.770423	0.765154
		STDEV	0.0160432	0.0160533	0.04614	0.0447562	0.0461695	0.0447847	0.0148819	0.0144561
		STERROR	0.00717476	0.00717926	0.0206344	0.0200156	0.0206476	0.0200283	0.00665538	0.00646495

## Sheet: 25G
Date	Sample	d47 (Gonf.)	D47 (Gonf.)	D47 (Brand)	StDev D47 (Gonf.)	StDev D47 (Brand)	d47 (Gonf., corr)	D47 (Gonf., corr)	D47 (Brand, corr)	StDev D47 (Gonf., corr)	StDev D47 (Brand, corr)	δ13C (Gonf.)	δ18O (Gonf.)	δ13C (Brand)	δ18O (Brand)	Diff. Bellow	# Acqui	se (corr)
2016-07-08	25G (ve+0)	8.0837	0.0514183	0.0557591	0.024456	0.0244569	7.99628	-0.0353127	-0.0309705	0.0237443	0.0237448	-3.5546	32.4984	-3.55297	32.508	52.9047	10	0.00750862	Filament change
2016-07-08	25G (ve-40)	-27.7805	-0.297961	-0.27704	0.0262542	0.0262513	-27.5017	-0.0111829	0.00970042	0.0166191	0.0166185	-40.8914	33.3808	-40.7918	33.3861	23.5613	10	0.00525544
2016-07-13	25G (ve+0)	8.07066	0.0502669	0.0545909	0.0327047	0.0327055	8.00245	-0.0174042	-0.0130792	0.0414566	0.0414542	-3.54575	32.4778	-3.54417	32.4874	97.8025	10	0.0131097		Gonfiantini		from/until	Brand
2016-07-18	25G (ve-40)	-19.8495	-0.274777	-0.248817	0.0434729	0.0434737	-19.6197	-0.0404268	-0.0145002	0.03721	0.0372081	-40.7644	41.4921	-40.6613	41.4968	106.083	10	0.0117669		-3.17248e-05	-0.0347059	2016-07-08	-0.000208077	-0.0170505
2016-07-19	25G (ind+0)	17.0177	0.140982	0.150793	0.0224851	0.0224836	16.8396	-0.0340955	-0.0242801	0.0190779	0.0190806	-3.59756	41.4266	-3.59148	41.4356	109.063	10	0.00603296		0.000106789	0.00228078	2016-12-22	9.70302e-05	0.00207235
2016-07-21	25G (ind+0)	17.1743	0.163577	0.173492	0.0438087	0.0438106	16.9813	-0.0261366	-0.0162168	0.0395261	0.0395225	-3.61806	41.5812	-3.6119	41.5902	56.4739	10	0.0124992		0.00214796	0.0149451		0.100851	0.0135794
2016-07-22	25G (ve-40)	-28.9933	-0.37877	-0.358593	0.0204961	0.0204909	-28.6709	-0.046836	-0.0267026	0.014101	0.0140977	-40.8786	32.1858	-40.7797	32.1911	73.1473	10	0.00445913		0.088256	41		4.59869	41
2016-07-26	25G (ve+0)	8.25606	0.0708261	0.0752407	0.0241918	0.0241926	8.15277	-0.0316259	-0.0272097	0.0185857	0.0185868	-3.53497	32.6327	-3.53332	32.6423	56.8838	10	0.0058773		1.97126e-05	0.00915762		0.000847994	0.00756036
2016-07-28	25G (ind-40)	-19.9808	-0.270743	-0.244781	0.0270424	0.0270385	-19.7306	-0.0153834	0.0105422	0.021054	0.0210509	-40.8502	41.4389	-40.7468	41.4436	33.7109	10	0.00665786
2016-08-03	25G (ve-40)	-29.1696	-0.366525	-0.346487	0.0262726	0.0262692	-28.8359	-0.0229008	-0.00290814	0.0283856	0.0283844	-40.8682	31.979	-40.7693	31.9843	-9.23458	10	0.00897631		0.000134708	-0.0426164	2017-01-07	4.17138e-06	-0.0226878
2016-08-09	25G (vex+0)	31.1326	0.339885	0.358153	0.0248592	0.0248912	30.756	-0.0254533	-0.00717099	0.0279415	0.0279066	-3.5566	55.3582	-3.54403	55.3662	39.1294	10	0.00883587		0.000123268	0.00275075	2017-04-03	0.00013114	0.00292643
2016-08-12	25G (ve-40)	-29.0305	-0.39158	-0.371437	0.0268318	0.0268267	-28.6618	-0.0119372	0.00815548	0.0187187	0.018717	-40.8621	32.1432	-40.7632	32.1485	40.3934	10	0.00591937		0.0514883	0.0134698		4.59882e-05	0.0143301
2016-08-16	25G (ve+0)	17.2857	0.19055	0.200495	0.0313041	0.031303	17.0467	-0.0444235	-0.0344728	0.0207067	0.0207062	-3.59778	41.6456	-3.59165	41.6546	39.7675	10	0.00654804		1.19423	22		0.00101179	22
2016-08-18	25G (ind-40)	-19.647	-0.246432	-0.220428	0.0296156	0.0296096	-19.4445	-0.0398342	-0.0138596	0.0173173	0.0173164	-40.7031	41.6114	-40.6001	41.6161	-93.1419	10	0.00547622		0.000216677	0.00399161		2.07772e-07	0.00451773
2016-08-23	25G (ve+0)	7.93583	0.0395037	0.043775	0.028511	0.0285117	7.85976	-0.0359719	-0.0316995	0.0299259	0.0299271	-3.56972	32.3767	-3.5681	32.3862	180.039	10	0.0094634	New background V:9.548 (before: 9.547)
2016-08-25	25G (ve+0)	8.19867	0.0574407	0.0618521	0.0291835	0.0291838	8.12275	-0.0178668	-0.0134543	0.027705	0.0277055	-3.5591	32.6122	-3.5574	32.6218	197.418	10	0.0087611
2016-08-30	25G (ve-40)	-29.0074	-0.404904	-0.384736	0.0186282	0.0186264	-28.6387	-0.0252681	-0.00515002	0.0208416	0.0208388	-40.8599	32.1786	-40.7611	32.1839	0.817835	10	0.00659068
2016-09-02	25G (vex+0)	31.2285	0.366735	0.385079	0.0255974	0.025596	30.8356	-0.0144597	0.00389965	0.0232112	0.0232098	-3.58996	55.4602	-3.57731	55.4682	60.0213	10	0.00734003
2016-09-14	25G (vex-40)	-7.36561	-0.112988	-0.0788058	0.0408149	0.0408085	-7.29216	-0.0389801	-0.00480955	0.0329311	0.0329267	-40.9573	54.5281	-40.8474	54.5319	13.5999	10	0.0104137
2016-09-16	25G (ve-40)	-29.4846	-0.391022	-0.371122	0.0245647	0.0245616	-29.1259	-0.0214535	-0.00160167	0.0141364	0.0141333	-40.9139	31.7218	-40.815	31.7271	-42.1264	10	0.00447032
2016-09-20	25G (vex+0)	31.582	0.347715	0.366313	0.0397962	0.0397924	31.1786	-0.0435012	-0.0248867	0.0205909	0.0205897	-3.61656	55.8614	-3.60363	55.8694	128.166	10	0.00651143
2016-09-22	25G (vex-40)	-6.91646	-0.141549	-0.107114	0.0236944	0.0236903	-6.83711	-0.0616409	-0.0272186	0.0226959	0.022697	-40.9012	54.9672	-40.7912	54.971	52.539	10	0.00717707
2016-09-27	25G (ve+0)	7.98069	0.0775844	0.0818876	0.0250717	0.0250726	7.87677	-0.0255326	-0.0212278	0.0207337	0.0207354	-3.59621	32.4092	-3.59455	32.4187	70.8778	10	0.00655659
2016-10-06	25G (ve+0)	8.3992	0.0676027	0.0721284	0.0383253	0.0383228	8.29132	-0.0393826	-0.0348553	0.0126082	0.0126103	-3.55719	32.8017	-3.55541	32.8112	59.7148	10	0.00398706
2016-10-12	25G (ve-40)	-29.1962	-0.461911	-0.441827	0.0372909	0.0372827	-28.8094	-0.063579	-0.0435468	0.0281936	0.0281882	-40.8568	32.0363	-40.758	32.0416	56.9842	10	0.00891559
2016-10-14	25G (vex+0)	31.294	0.357793	0.376153	0.028856	0.028854	30.8992	-0.0251941	-0.00681912	0.0133486	0.0133476	-3.56045	55.5057	-3.54787	55.5137	120.718	10	0.00422121
2016-10-17	25G (vex-40)	-6.75029	-0.141727	-0.107173	0.0216361	0.0216322	-6.66558	-0.0564442	-0.0219037	0.02358	0.0235761	-40.9102	55.1499	-40.8002	55.1536	5.95994	10	0.00745666
2016-10-25	25G (vex+0)	31.1953	0.354702	0.373007	0.0450707	0.0450765	30.7989	-0.0298376	-0.0115171	0.0210951	0.021095	-3.56318	55.4126	-3.55065	55.4206	42.0904	9	0.00703171
2016-10-31	25G (vex-40)	-6.63261	-0.137939	-0.103352	0.0231515	0.0231476	-6.54295	-0.0476763	-0.013103	0.0362167	0.0362127	-40.8734	55.2304	-40.7635	55.2342	11.3004	10	0.0114527
2016-11-03	25G (ve-40)	-29.0411	-0.423761	-0.403584	0.0385888	0.0385811	-28.6502	-0.0212817	-0.00115816	0.0311181	0.0311146	-40.8778	32.1806	-40.7788	32.186	48.3985	10	0.00984041
2016-11-07	25G (ve+0)	8.13286	0.0790378	0.0833522	0.0295844	0.0295835	8.02712	-0.0258626	-0.0215466	0.0123533	0.012354	-3.51656	32.4827	-3.51507	32.4922	67.916	10	0.00390646
2016-11-12	25G (vex+0)	30.9512	0.336678	0.354876	0.0522366	0.0522465	30.5356	-0.0665778	-0.0483645	0.0198538	0.0198489	-3.59335	55.2162	-3.58077	55.2242	129.276	10	0.00627833
2016-11-15	25G (vex-40)	-6.70262	-0.166878	-0.132277	0.0313392	0.0313323	-6.60306	-0.066641	-0.0320557	0.0182924	0.0182889	-40.9071	55.2224	-40.7971	55.2261	94.3502	10	0.00578456
2016-11-17	25G (ve-40)	-28.8856	-0.426135	-0.405845	0.0279751	0.0279703	-28.5042	-0.0334996	-0.0132614	0.0170954	0.0170932	-40.8852	32.3526	-40.7861	32.358	56.305	10	0.00540604
2016-11-23	25G (ve+0)	7.54802	0.0695393	0.0735864	0.0264528	0.0264518	7.44356	-0.0341422	-0.0300935	0.0202095	0.02021	-3.60175	31.9878	-3.60023	31.9974	23.7936	10	0.00639081
2016-11-25	25G (vex+0)	31.2292	0.394523	0.412845	0.0179739	0.0179729	30.7859	-0.0355149	-0.0171754	0.012255	0.0122561	-3.5873	55.4294	-3.57465	55.4374	-10.8898	10	0.00387538
2016-11-30	25G (vex-40)	-6.47175	-0.140714	-0.106016	0.0164884	0.0164838	-6.3814	-0.0497646	-0.0150812	0.0135839	0.0135832	-40.8762	55.4037	-40.7662	55.4074	63.3187	10	0.0042956
2016-12-02	25G (ve-40)	-29.0214	-0.41876	-0.398555	0.0342505	0.0342446	-28.6319	-0.0176491	0.00250224	0.0289781	0.0289734	-40.8928	32.2113	-40.7938	32.2166	6.28541	10	0.00916369
2016-12-07	25G (ve+0)	8.0276	0.091696	0.0959965	0.0376452	0.0376481	7.89501	-0.0398532	-0.0355507	0.0275514	0.0275494	-3.57382	32.42	-3.57218	32.4296	-11.0543	10	0.00871251
2016-12-13	25G (vex+0)	31.057	0.389007	0.407248	0.0200391	0.0200379	30.6288	-0.0264564	-0.00819863	0.0237358	0.0237349	-3.60681	55.2818	-3.5942	55.2897	33.1036	10	0.00750592
2016-12-15	25G (vex-40)	-6.59371	-0.153212	-0.11855	0.0341073	0.0340998	-6.4968	-0.0556528	-0.0210054	0.0164395	0.0164354	-40.9086	55.3233	-40.7985	55.3269	149.522	10	0.00519863
2016-12-20	25G (Ve-40)	-28.8937	-0.437117	-0.416832	0.0284573	0.0284495	-28.5028	-0.0346939	-0.0144611	0.016183	0.016184	-40.879	32.349	-40.78	32.3544	30.9136	10	0.00511751
2016-12-22	25G (ve+0)	8.19409	0.0919324	0.0962948	0.0378957	0.0378945	8.06723	-0.0339101	-0.0295457	0.0308491	0.0308489	-3.53545	32.5495	-3.53383	32.5591	8.40544	10	0.00975534
2017-01-07	25G (ve-40)	-6.36679	-0.124528	-0.0897783	0.0231587	0.0231535	-6.30198	-0.0592945	-0.0245546	0.0171552	0.0171513	-40.8733	55.4933	-40.7633	55.497	25.8047	10	0.00542495	First in 2017
2017-01-07	25G (vex+0)	31.165	0.34534	0.363669	0.0137118	0.01371	30.7867	-0.0217416	-0.00339751	0.0103665	0.0103653	-3.60006	55.4287	-3.58739	55.4367	44.9814	10	0.00327819
2017-01-11	25G (ve+0)	8.14861	0.0680295	0.0724188	0.03245	0.0324482	8.03553	-0.0441423	-0.0397513	0.014251	0.0142527	-3.57368	32.5655	-3.57197	32.5751	60.152	10	0.00450656
2017-01-13	25G (ve-40)	-28.4038	-0.389143	-0.368524	0.0188793	0.0188781	-28.089	-0.0651724	-0.0445963	0.0191621	0.0191606	-40.924	32.8567	-40.8246	32.862	-43.8757	10	0.00605958
2017-01-17	25G (ve-40)	-28.8915	-0.423331	-0.403018	0.0292679	0.029262	-28.5232	-0.0441975	-0.0239339	0.0198727	0.01987	-40.9123	32.3712	-40.8132	32.3765	69.8501	10	0.00628431
2017-01-24	25G (vex+0)	31.0428	0.344318	0.362755	0.032447	0.0324429	30.6435	-0.0430641	-0.0246118	0.0224383	0.0224348	-3.77627	55.4832	-3.76306	55.4912	25.8329	10	0.0070956
2017-01-26	25G (vex-40)	-6.55241	-0.142249	-0.107616	0.0291673	0.0291609	-6.45662	-0.0458232	-0.0112061	0.0205624	0.0205579	-40.8618	55.3064	-40.7519	55.3102	72.9901	10	0.00650241
2017-01-30	25G (ve+0)	8.02204	0.0499175	0.0542933	0.0298684	0.0298648	7.94286	-0.0286453	-0.0242683	0.0177452	0.0177475	-3.626	32.5079	-3.62419	32.5174	74.0913	10	0.00561151
2017-02-01	25G (ve-40)	-28.9013	-0.373101	-0.35287	0.0262671	0.0262615	-28.5612	-0.0229787	-0.00279438	0.0214009	0.0213972	-40.8764	32.2736	-40.7775	32.279	8.17178	10	0.00676757
2017-02-07	25G (vex+0)	31.0825	0.339203	0.357484	0.0188547	0.0188531	30.6895	-0.0421249	-0.023829	0.0143761	0.0143767	-3.5999	55.352	-3.58721	55.36	-2.33124	10	0.00454614
2017-02-09	25G (vex-40)	-7.88766	-0.1425	-0.108692	0.0194549	0.0194487	-7.81502	-0.0692809	-0.035485	0.014364	0.0143647	-40.9057	53.9615	-40.7962	53.9653	14.6103	10	0.00454228
2017-02-16	25G (ve-40)	-29.3548	-0.407632	-0.387702	0.0294335	0.029431	-29.0052	-0.0476201	-0.027737	0.0258517	0.0258481	-40.8515	31.8107	-40.7528	31.816	-13.0197	10	0.00817503
2017-02-22	25G (vex+0)	30.993	0.29882	0.31709	0.0313566	0.0313561	30.6368	-0.0467289	-0.0284454	0.0254106	0.0254063	-3.61445	55.3185	-3.60178	55.3264	73.483	10	0.00803555
2017-02-24	25G (vex-40)	-6.75415	-0.123617	-0.0890962	0.0320681	0.0320617	-6.65275	-0.0215141	0.0129908	0.0190189	0.0190156	-40.8962	55.1127	-40.7862	55.1164	39.2062	10	0.0060143
2017-02-28	25G (ve+0)	7.84799	0.0662001	0.0704024	0.0228027	0.0228	7.75567	-0.0254137	-0.0212099	0.013728	0.013728	-3.57111	32.2627	-3.56955	32.2723	49.2237	10	0.00434117
2017-03-04	25G (ve-40)	-28.9689	-0.432972	-0.412694	0.0221633	0.0221593	-28.5987	-0.0518247	-0.0315962	0.0117531	0.01175	-40.9213	32.3094	-40.8222	32.3147	134.47	10	0.00371667
2017-03-10	25G (vex+0)	31.2553	0.32135	0.339724	0.033189	0.0331873	30.8672	-0.0551296	-0.0367403	0.0340107	0.0340068	-3.57574	55.5198	-3.56305	55.5278	22.2432	10	0.0107551
2017-03-13	25G (vex-40)	-6.79127	-0.129495	-0.0949835	0.038131	0.0381238	-6.70234	-0.0399486	-0.00545117	0.032952	0.0329459	-40.9054	55.0896	-40.7954	55.0933	10.232	10	0.0104204
2017-03-17	25G (ve+0)	8.23122	0.0685741	0.0730049	0.0234724	0.0234685	8.13489	-0.0269862	-0.0225539	0.013146	0.0131451	-3.5658	32.6402	-3.56405	32.6498	5.1303	10	0.00415712
2017-03-21	25G (ve-40)	-28.8502	-0.399642	-0.379324	0.0308609	0.0308541	-28.5206	-0.0602957	-0.0400225	0.0178166	0.0178177	-40.9089	32.3868	-40.8098	32.3921	-0.383924	10	0.00563411
2017-03-24	25G (ve+0)	30.9737	0.315305	0.333599	0.0288519	0.0288489	30.6088	-0.0387087	-0.0204014	0.0254274	0.0254278	-3.65736	55.3249	-3.6446	55.3329	66.0733	10	0.00804084
2017-03-29	25G (vex-40)	-6.49694	-0.0999553	-0.0653002	0.0312279	0.0312211	-6.44348	-0.0461397	-0.011493	0.0461604	0.0461519	-40.8824	55.3417	-40.7724	55.3455	-4.80095	10	0.0145972
2017-03-31	25G (ve+0)	8.1539	0.0733343	0.0777651	0.0280202	0.0280159	8.03622	-0.0434049	-0.0389723	0.0177499	0.0177541	-3.61452	32.6054	-3.6127	32.615	12.1376	10	0.005613
2017-04-03	25G (ve-40)	-28.8612	-0.417509	-0.397202	0.0394839	0.0394781	-28.4894	-0.0347703	-0.0145133	0.0345947	0.034588	-40.8933	32.3776	-40.7942	32.3829	71.4016	10	0.0109398

## Sheet: HG
Date	Sample	d47 (Gonf.)	D47 (Gonf.)	D47 (Brand)	StDev D47 (Gonf.)	StDev D47 (Brand)	d47 (Gonf., corr)	D47 (Gonf., corr)	D47 (Brand, corr)	StDev D47 (Gonf., corr)	StDev D47 (Brand, corr)	δ13C (Gonf.)	δ18O (Gonf.)	δ13C (Brand)	δ18O (Brand)	Diff. Bellow	# Acqui	se (corr)
2016-07-06	HG100	-3.75375	-0.852651	-0.855019	0.0222883	0.0222888	-3.7404	-0.839256	-0.841624	0.027984	0.0279863	-3.5814	21.5321	-3.58504	21.5424	-64.4217	10	0.00884932	filament change
2016-07-07	HG200	12.8752	-0.782265	-0.780225	0.0383766	0.0383767	12.7752	-0.880929	-0.878889	0.030634	0.0306333	2.12969	32.5975	2.11659	32.6078	153.736	9	0.0102113
2016-07-07	HG200	12.9032	-0.773065	-0.77102	0.0464271	0.0464365	12.805	-0.869964	-0.867919	0.0451286	0.0451397	2.13632	32.6098	2.1232	32.62	139.014	10	0.0142709		Gonfiantini		from/until	Brand
2016-07-07	HG50	-30.6514	-1.19515	-1.19175	0.0343703	0.0343686	-30.3657	-0.900823	-0.897443	0.053885	0.0538825	-25.5243	15.9457	-25.4733	15.9539	25.8249	10	0.0170399		0.000198247	-0.867007	2016-07-06	0.000200161	-0.865907
2016-07-12	HG50	-30.7303	-1.17553	-1.17205	0.0195442	0.0195405	-30.4022	-0.837321	-0.833865	0.011375	0.0113728	-25.6609	15.9794	-25.6097	15.9876	102.295	10	0.0035971		0.000126056	0.00210984	2016-12-22	0.000123213	0.00206226
2016-07-14	HG200	16.7938	-0.70655	-0.70212	0.0286287	0.0286284	16.6094	-0.887809	-0.883379	0.0291844	0.0291846	2.0871	36.4822	2.07592	36.4922	30.4092	10	0.00922893		0.0372081	0.0167464		0.0396018	0.0163688
2016-07-14	HG50	-30.5177	-1.21946	-1.21591	0.0324799	0.0324754	-30.2098	-0.902193	-0.898665	0.0266587	0.0266547	-25.5687	16.1511	-25.5176	16.1593	55.5909	10	0.00843021		2.47335	64		2.63902	64
2016-07-21	HG100	-2.54158	-0.908761	-0.910228	0.0236178	0.0236162	-2.48959	-0.856688	-0.858156	0.0198377	0.0198364	-3.69674	22.92	-3.69936	22.9303	96.7525	10	0.00627323		0.00069363	0.0179483		0.00070709	0.0171479
2016-07-25	HG200	17.9231	-0.665246	-0.660116	0.0132267	0.013226	17.7019	-0.88244	-0.87731	0.0117687	0.0117694	2.0502	37.6059	2.03964	37.6157	20.8438	10	0.00372158
2016-07-27	HG50	-25.5849	-1.19393	-1.19169	0.0362451	0.0362403	-25.2778	-0.87918	-0.876957	0.0227278	0.0227241	-21.2815	16.9733	-21.2412	16.9819	6.25109	10	0.00718717		3.25132e-05	-0.860968	2017-01-06	5.97132e-05	-0.85948
2016-07-29	HG100	-2.69935	-0.88769	-0.889557	0.024004	0.0240024	-2.68397	-0.872283	-0.874149	0.0167937	0.0167931	-3.41213	22.4641	-3.41572	22.4744	-2.77271	10	0.00531063		0.000129921	0.00219892	2017-04-05	0.000127524	0.00215833
2016-08-03	HG200	15.2324	-0.668357	-0.664939	0.0372381	0.0372352	15.0561	-0.841939	-0.83852	0.0380746	0.0380734	2.12126	34.8483	2.10919	34.8583	31.2183	10	0.0120403		0.00160324	0.0136549		0.00559061	0.0134029
2016-08-11	HG100	-3.75249	-0.897196	-0.899645	0.030387	0.0303858	-3.75103	-0.895736	-0.898184	0.0206294	0.0206301	-3.47518	21.4751	-3.47908	21.4855	-45.1575	10	0.00652359		0.0626266	39		0.21926	39
2016-08-16	HG200	17.2429	-0.675025	-0.670375	0.0201084	0.0201092	17.0413	-0.873059	-0.868408	0.0129504	0.0129523	2.12008	36.8671	2.10897	36.877	69.763	10	0.00409528		1.16771e-05	0.00727179		3.93872e-05	0.00700586
2016-08-19	HG50	-30.4875	-1.28296	-1.2795	0.0262592	0.0262572	-30.1018	-0.885587	-0.882155	0.0233815	0.02338	-25.419	16.0982	-25.3683	16.1064	29.5038	10	0.00739389
2016-08-20	HG100	-1.42	-0.881152	-0.88198	0.0265704	0.0265671	-1.42205	-0.883209	-0.884037	0.0123756	0.0123716	-3.65906	23.9844	-3.66129	23.9946	14.4181	10	0.0039135
2016-08-22	HG200	16.5772	-0.652424	-0.648177	0.0391275	0.0391339	16.3786	-0.847675	-0.843427	0.0177518	0.017754	2.10311	36.1949	2.09173	36.2049	84.6204	10	0.00561361
2016-08-23	HG50	-30.7646	-1.30276	-1.29942	0.065574	0.0655806	-30.3528	-0.878379	-0.875065	0.0294103	0.0294168	-25.468	15.8813	-25.4173	15.8895	138.696	10	0.00930037	New background V:9.548 (before: 9.547)
2016-08-25	HG100	-2.5325	-0.897485	-0.898938	0.0380229	0.038029	-2.4876	-0.852511	-0.853964	0.0169377	0.0169359	-3.71184	22.9325	-3.71443	22.9427	74.3385	10	0.00535618
2016-08-30	HG200	17.4142	-0.629994	-0.62516	0.0206599	0.0206602	17.1929	-0.847283	-0.842449	0.0186654	0.0186669	2.01335	37.097	2.00266	37.1068	43.0892	10	0.00590253
2016-08-31	HG50	-30.7836	-1.28255	-1.27884	0.0322487	0.0322453	-30.3959	-0.883014	-0.879325	0.031598	0.031597	-25.8507	16.2184	-25.7989	16.2265	5.09316	10	0.00999218
2016-09-01	HG100	-1.46278	-0.869758	-0.870655	0.0253304	0.0253284	-1.46599	-0.872963	-0.873861	0.0188406	0.0188388	-3.62367	23.8956	-3.62604	23.9057	15.8437	10	0.00595793
2016-09-06	HG50	-25.7875	-1.19486	-1.19279	0.0256066	0.0256033	-25.4704	-0.869699	-0.867646	0.0155547	0.0155525	-21.2447	16.7307	-21.2047	16.7393	5.02759	10	0.00491882
2016-09-07	HG100	-2.11924	-0.879596	-0.880905	0.0369493	0.0369498	-2.1032	-0.863539	-0.864848	0.0194056	0.0194077	-3.60984	23.2314	-3.6126	23.2417	-16.9552	10	0.00613658
2016-09-07	HG200	13.9488	-0.699075	-0.696534	0.0430455	0.0430523	13.7956	-0.850045	-0.847505	0.023357	0.0233584	2.23594	33.4836	2.22288	33.4939	111.615	10	0.00738614
2016-09-13	HG100	-2.98623	-0.910797	-0.912534	0.0357008	0.0357018	-2.93795	-0.862415	-0.864152	0.0229271	0.0229252	-3.70006	22.478	-3.70297	22.4882	116.992	10	0.00725019
2016-09-15	HG200	16.5816	-0.666532	-0.662197	0.0402828	0.0402927	16.3769	-0.867755	-0.863419	0.0229023	0.0229102	2.02784	36.2871	2.01674	36.2971	150.804	10	0.00724234
2016-09-19	HG100	-2.71191	-0.901581	-0.903212	0.0268087	0.0268078	-2.65025	-0.839809	-0.841441	0.0221774	0.0221774	-3.64096	22.6874	-3.64394	22.6977	132.52	10	0.0070131
2016-09-21	HG200	12.4383	-0.712669	-0.710798	0.026566	0.0265666	12.2767	-0.872215	-0.870344	0.0152644	0.0152663	1.99227	32.2238	1.97927	32.234	31.6428	10	0.00482703
2016-09-23	HG100	-3.37028	-0.892689	-0.894856	0.0250562	0.0250533	-3.31783	-0.840102	-0.84227	0.0163937	0.0163932	-3.52131	21.9	-3.52493	21.9102	68.2648	10	0.00518414
2016-09-27	HG50	-30.6069	-1.32682	-1.32314	0.0349139	0.0349101	-30.189	-0.896277	-0.892625	0.0170482	0.0170467	-25.6786	16.2748	-25.6271	16.2829	159.904	10	0.00539112
2016-09-30	HG200	12.0106	-0.74638	-0.745027	0.0406893	0.0406863	11.8919	-0.863633	-0.862281	0.0188018	0.0187992	2.26689	31.5629	2.25287	31.5731	154.593	10	0.00594565
2016-10-01	HG100	-2.19117	-0.893954	-0.895326	0.0595471	0.0595537	-2.14148	-0.844196	-0.845568	0.0179819	0.0179852	-3.58462	23.149	-3.58743	23.1592	66.301	10	0.00568636
2016-10-03	HG50	-25.9773	-1.22035	-1.21775	0.0139689	0.0139684	-25.6255	-0.859625	-0.857045	0.0128438	0.0128394	-21.856	17.1616	-21.814	17.1702	67.2504	10	0.00406155
2016-10-05	HG100	-3.59588	-0.901714	-0.903971	0.0258785	0.0258765	-3.54548	-0.851172	-0.853429	0.0221559	0.0221544	-3.56571	21.725	-3.56927	21.7353	28.077	10	0.00700633
2016-10-11	HG50	-24.6522	-1.20147	-1.19871	0.0315143	0.0315103	-24.3222	-0.863525	-0.860784	0.0182885	0.0182877	-21.203	17.8587	-21.1625	17.8673	24.8372	10	0.00578334
2016-10-12	HG100	-3.86263	-0.927754	-0.930243	0.0341616	0.0341619	-3.81886	-0.883859	-0.886348	0.0272531	0.0272543	-3.48436	21.4039	-3.48827	21.4142	13.2646	10	0.00861818
2016-10-15	HG200	16.9988	-0.6701	-0.665627	0.0301143	0.0301131	16.803	-0.862548	-0.858075	0.0292411	0.0292406	2.14579	36.5928	2.13447	36.6028	148.389	10	0.00924685
2016-10-18	HG50	-24.9524	-1.18792	-1.18527	0.0279138	0.0279102	-24.6395	-0.86736	-0.864722	0.0215274	0.021525	-21.2997	17.6327	-21.2589	17.6412	-13.4143	10	0.00680756
2016-10-18	HG100	-3.73907	-0.93867	-0.941026	0.0189513	0.0189491	-3.6852	-0.884652	-0.887008	0.0284306	0.0284291	-3.53105	21.5844	-3.53481	21.5948	70.2331	10	0.00899055
2016-10-19	HG200	11.5995	-0.727407	-0.726257	0.022205	0.022204	11.465	-0.86022	-0.859071	0.0157849	0.0157857	2.20755	31.19	2.19349	31.2003	113.576	10	0.00499163
2016-10-20	HG200	11.8098	-0.680264	-0.679156	0.0380538	0.0380567	11.6232	-0.864522	-0.863415	0.0221717	0.0221726	2.34868	31.2154	2.33427	31.2258	-23.4251	10	0.00701131
2016-10-24	HG50	-25.3829	-1.20724	-1.20445	0.0327416	0.0327388	-25.0669	-0.88343	-0.880661	0.0370931	0.0370913	-21.6778	17.5825	-21.6361	17.591	-4.93105	10	0.0117299
2016-10-25	HG50	-25.1079	-1.19647	-1.1938	0.0287874	0.0287851	-24.7996	-0.880632	-0.877982	0.031179	0.0311775	-21.3998	17.5803	-21.3588	17.5888	29.3241	10	0.00985967
2016-10-26	HG100	-3.84482	-0.896661	-0.899169	0.0260515	0.0260519	-3.80801	-0.85975	-0.862257	0.0218734	0.0218742	-3.4709	21.3776	-3.47494	21.388	39.4877	10	0.00691697
2016-11-01	HG200	12.6848	-0.70167	-0.699803	0.0423184	0.0423158	12.5099	-0.87422	-0.872353	0.0234007	0.023401	2.13839	32.3168	2.12509	32.3271	6.53554	10	0.00739994
2016-11-02	HG50	-26.6882	-1.27045	-1.26843	0.0285049	0.0285018	-26.3044	-0.876617	-0.874616	0.0225861	0.0225856	-21.7044	16.3346	-21.6633	16.3432	186.46	10	0.00714236
2016-11-04	HG100	-2.93709	-0.873534	-0.875572	0.0273388	0.0273367	-2.91941	-0.855824	-0.857862	0.0201857	0.0201887	-3.39414	22.1932	-3.39794	22.2036	-11.9029	10	0.00638327
2016-11-08	HG200	15.5247	-0.667034	-0.663488	0.0332876	0.0332874	15.3269	-0.861698	-0.858152	0.0182439	0.0182431	2.17138	35.0904	2.15927	35.1004	75.9496	10	0.00576922
2016-11-12	HG100	-5.286	-0.929242	-0.932629	0.015473	0.015471	-5.25253	-0.895625	-0.899011	0.0058951	0.00589449	-3.46574	19.9551	-3.47044	19.9656	-76.3962	10	0.00186419
2016-11-14	HG200	12.6334	-0.691581	-0.689813	0.0256928	0.0256901	12.4578	-0.864854	-0.863087	0.0211472	0.0211463	2.20097	32.1944	2.18738	32.2046	12.8392	10	0.00668732
2016-11-16	HG100	-4.85386	-0.894935	-0.897927	0.0322594	0.032258	-4.79626	-0.837103	-0.840095	0.0222077	0.0222068	-3.61135	20.4966	-3.61545	20.5069	20.7421	10	0.0070227
2016-11-16	HG50	-25.7596	-1.19836	-1.19597	0.0305588	0.0305575	-25.4307	-0.861206	-0.858839	0.0149383	0.0149378	-21.529	17.0416	-21.488	17.0502	23.011	10	0.00472391
2016-11-21	HG100	-1.47308	-0.892799	-0.893681	0.0427525	0.0427606	-1.4527	-0.872396	-0.873279	0.0108315	0.0108362	-3.63025	23.9147	-3.6326	23.9249	74.9165	10	0.00342521
2016-11-22	HG100	-1.97601	-0.88735	-0.888496	0.0284857	0.0284828	-1.93721	-0.848513	-0.849659	0.0208932	0.0208918	-3.68115	23.4527	-3.68362	23.4628	87.1877	10	0.006607
2016-11-25	HG200	13.8274	-0.719424	-0.71678	0.0586557	0.0586599	13.6614	-0.88309	-0.880445	0.0437754	0.043774	2.06969	33.5449	2.05715	33.5551	145.226	10	0.013843
2016-12-01	HG100	-5.6878	-0.92291	-0.926547	0.026107	0.0261065	-5.61791	-0.85269	-0.856327	0.021084	0.0210838	-3.46739	19.5461	-3.47232	19.5566	20.9681	10	0.00666736
2016-12-02	HG200	11.8116	-0.72273	-0.721434	0.0296753	0.029676	11.634	-0.89817	-0.896875	0.0305601	0.0305601	2.18875	31.4158	2.17486	31.4261	1.28952	10	0.00966395
2016-12-07	HG50	-26.372	-1.2228	-1.22072	0.0411452	0.0411385	-26.0288	-0.870669	-0.868607	0.0338844	0.0338805	-21.5965	16.505	-21.5556	16.5137	52.6381	10	0.0107152
2016-12-08	HG100	-1.9368	-0.867458	-0.868551	0.0290668	0.0290633	-1.91447	-0.845108	-0.846201	0.0215866	0.0215871	-3.72057	23.5104	-3.72291	23.5205	1.64481	10	0.00682628
2016-12-09	HG200	10.6268	-0.714584	-0.713946	0.0154935	0.0154921	10.4633	-0.876213	-0.875576	0.00557265	0.00557554	2.11864	30.2904	2.10436	30.3008	-25.8773	10	0.00176223
2016-12-13	HG100	-1.86539	-0.873773	-0.874977	0.0268454	0.026844	-1.86079	-0.869168	-0.870372	0.0197105	0.0197106	-3.564	23.4365	-3.56675	23.4467	-32.7531	10	0.00623299
2016-12-14	HG200	17.4358	-0.64724	-0.642487	0.0399295	0.0399373	17.2018	-0.877046	-0.872291	0.0228206	0.0228251	2.11568	37.0361	2.10471	37.046	38.2589	10	0.00721651
2016-12-16	HG50	-25.327	-1.18774	-1.185	0.0283538	0.0283505	-24.9991	-0.851729	-0.849001	0.0182972	0.0182976	-21.6172	17.5607	-21.5757	17.5692	59.5851	10	0.00578607
2016-12-20	HG200	15.0242	-0.665837	-0.662576	0.0254146	0.0254148	14.8352	-0.851883	-0.848621	0.0261601	0.026161	2.14781	34.6114	2.13562	34.6215	92.2719	10	0.00827254
2016-12-22	HG100	-1.57917	-0.864234	-0.865187	0.0456719	0.0456691	-1.59905	-0.884125	-0.885079	0.0307747	0.0307732	-3.64101	23.7897	-3.64342	23.7999	-44.563	10	0.00973182
2017-01-06	HG100	-2.69446	-0.823827	-0.825546	0.0294876	0.0294854	-2.70396	-0.833353	-0.835072	0.0152116	0.0152112	-3.59224	22.5796	-3.59535	22.5898	-21.5796	10	0.00481033	First in 2017
2017-01-09	HG100	-1.87161	-0.880311	-0.881403	0.0445343	0.0445333	-1.86117	-0.869861	-0.870953	0.0284244	0.0284237	-3.67336	23.5431	-3.67581	23.5532	42.6699	10	0.0089886
2017-01-10	HG50	-25.3914	-1.18441	-1.18169	0.0309653	0.0309697	-25.0501	-0.834671	-0.83197	0.0220876	0.0220884	-21.6327	17.5067	-21.5912	17.5152	75.4446	10	0.00698471
2017-01-10	HG200	17.0571	-0.681024	-0.676402	0.0191173	0.0191175	16.8754	-0.859557	-0.854934	0.0174359	0.0174378	2.03847	36.7672	2.02757	36.7771	167.169	10	0.00551373
2017-01-11	HG100	-4.68962	-0.925321	-0.928338	0.0327973	0.0327944	-4.61012	-0.845517	-0.848535	0.0208081	0.0208054	-3.46732	20.5529	-3.47174	20.5632	124.777	10	0.00658009
2017-01-12	HG200	13.3355	-0.692114	-0.689819	0.0300188	0.0300175	13.1517	-0.873367	-0.871073	0.0282803	0.0282806	2.10191	32.9937	2.089	33.0039	-13.5498	10	0.00894303
2017-01-12	HG100	-3.95482	-0.901908	-0.904414	0.0396994	0.0396972	-3.91322	-0.860178	-0.862684	0.0200084	0.0200072	-3.53912	21.3383	-3.54295	21.3486	-36.0516	10	0.00632721
2017-01-17	HG50	-25.962	-1.19762	-1.19537	0.0332053	0.0332021	-25.6569	-0.884803	-0.882577	0.0239257	0.0239253	-21.5174	16.8222	-21.4765	16.8308	38.6115	10	0.00756596
2017-01-17	HG200	14.2626	-0.705406	-0.702474	0.0183628	0.0183619	14.0986	-0.867023	-0.864091	0.0215338	0.0215331	2.04021	33.9948	2.02796	34.0049	72.1398	10	0.0068096
2017-01-20	HG50	-25.5707	-1.17299	-1.17051	0.0274826	0.0274805	-25.2528	-0.847126	-0.844661	0.0217485	0.0217477	-21.5237	17.2046	-21.4826	17.2132	20.8535	10	0.00687748
2017-01-23	HG200	17.9599	-0.619332	-0.614389	0.0184681	0.0184669	17.6994	-0.875098	-0.870155	0.0217836	0.0217855	2.22875	37.4213	2.21764	37.4312	9.62951	10	0.00688859
2017-01-25	HG50	-26.162	-1.17796	-1.17591	0.0426794	0.0426757	-25.8482	-0.856025	-0.853989	0.0363863	0.0363837	-21.4714	16.5526	-21.4307	16.5612	15.8133	10	0.0115063
2017-01-26	HG100	-4.01816	-0.899078	-0.901639	0.0217629	0.0217626	-3.97845	-0.859247	-0.861809	0.0251882	0.0251894	-3.52364	21.2567	-3.52757	21.267	20.5135	10	0.0079652
2017-01-30	HG200	17.9684	-0.643043	-0.637905	0.0348433	0.0348487	17.7563	-0.851272	-0.846134	0.0227132	0.02272	2.05515	37.6238	2.04459	37.6336	31.9826	10	0.00718254
2017-01-31	HG50	-25.9451	-1.16767	-1.16545	0.0235842	0.0235813	-25.6738	-0.88951	-0.8873	0.0142618	0.0142656	-21.5087	16.8011	-21.4679	16.8097	-67.7036	10	0.00450996
2017-02-01	HG100	-1.86198	-0.854975	-0.856087	0.0235591	0.0235588	-1.86323	-0.856231	-0.857343	0.0309068	0.0309088	-3.66481	23.519	-3.66727	23.5291	-9.03704	10	0.0097736
2017-02-07	HG200	17.1021	-0.641026	-0.636431	0.0291805	0.0291792	16.8645	-0.874531	-0.869936	0.0118402	0.0118397	2.06966	36.741	2.05862	36.7509	-1.75782	10	0.00374419
2017-02-07	HG50	-25.9548	-1.18202	-1.17978	0.0287515	0.0287501	-25.6579	-0.877508	-0.875282	0.0223499	0.0223491	-21.5218	16.8183	-21.4809	16.8269	5.63938	10	0.00706765
2017-02-07	HG100	-1.56137	-0.872216	-0.873114	0.0409266	0.0409322	-1.53941	-0.850233	-0.851132	0.0204772	0.020478	-3.68068	23.8543	-3.68297	23.8644	55.5378	10	0.00647545
2017-02-14	HG50	-25.3202	-1.16224	-1.15951	0.0292375	0.0292359	-25.0368	-0.871803	-0.86909	0.0247351	0.0247341	-21.6144	17.5394	-21.5729	17.5479	-63.4596	10	0.00782194
2017-02-21	HG100	-2.16815	-0.893489	-0.894745	0.0306985	0.0306954	-2.13441	-0.85971	-0.860965	0.0201186	0.0201196	-3.68711	23.2713	-3.68962	23.2814	67.7754	10	0.00636205
2017-02-22	HG200	17.1373	-0.677192	-0.672513	0.0353505	0.0353488	16.9423	-0.868813	-0.864133	0.0235821	0.0235832	2.02925	36.8525	2.01839	36.8625	80.2839	10	0.0074573
2017-02-24	HG50	-25.4395	-1.16908	-1.16617	0.0224152	0.0224144	-25.147	-0.869282	-0.866387	0.0317462	0.0317464	-21.858	17.6634	-21.8158	17.6719	-12.3028	10	0.010039
2017-02-27	HG100	-2.74919	-0.863073	-0.864817	0.0239541	0.0239526	-2.73425	-0.848107	-0.849851	0.01766	0.0176613	-3.5755	22.5477	-3.57871	22.558	-44.6236	10	0.00558459
2017-02-28	HG200	13.4855	-0.72526	-0.722746	0.0379571	0.0379613	13.3523	-0.856625	-0.854111	0.0225329	0.022529	1.99638	33.2802	1.98389	33.2904	119.308	10	0.00712553
2017-03-03	HG50	-26.3447	-1.18681	-1.18453	0.031689	0.0316861	-26.0437	-0.878098	-0.875838	0.0220248	0.0220221	-21.791	16.688	-21.7495	16.6966	-6.8923	10	0.00696486
2017-03-07	HG100	-4.24351	-0.871972	-0.874711	0.0343813	0.0343776	-4.23483	-0.863263	-0.866002	0.0176997	0.0176989	-3.50209	20.9819	-3.50622	20.9923	-66.2607	10	0.00559712
2017-03-09	HG200	11.7211	-0.763208	-0.761711	0.0321003	0.0320989	11.6089	-0.873955	-0.872457	0.0176604	0.0176607	1.95812	31.5905	1.94494	31.6008	124.521	10	0.00558472
2017-03-13	HG100	-2.57845	-0.859146	-0.86063	0.0269162	0.0269107	-2.60211	-0.882847	-0.884331	0.0302494	0.0302527	-3.73244	22.8678	-3.73502	22.878	-58.4061	10	0.0095657
2017-03-15	HG50	-25.2898	-1.12795	-1.12504	0.0348535	0.03485	-25.0216	-0.853033	-0.850131	0.0209915	0.0209905	-21.7972	17.7158	-21.7552	17.7244	-74.1545	10	0.00663809
2017-03-16	HG200	17.6116	-0.646102	-0.641062	0.0179786	0.0179779	17.4029	-0.851113	-0.846071	0.0111672	0.0111671	1.93672	37.3858	1.92641	37.3957	14.5852	10	0.00353139
2017-03-17	HG100	-4.64159	-0.908907	-0.911845	0.0585143	0.0585207	-4.56857	-0.835618	-0.838557	0.0227724	0.022776	-3.52459	20.6401	-3.52883	20.6505	13.7577	10	0.00720127
2017-03-21	HG50	-25.6305	-1.15932	-1.15658	0.0435516	0.0435455	-25.3469	-0.868553	-0.865831	0.013494	0.013492	-21.8131	17.4137	-21.7712	17.4223	15.8491	10	0.00426719
2017-03-24	HG200	18.0391	-0.67958	-0.674414	0.0290695	0.0290654	17.8679	-0.847609	-0.842442	0.0249991	0.0250031	2.09181	37.6958	2.08119	37.7057	96.115	10	0.00790541
2017-03-24	HG100	-1.62898	-0.846561	-0.847532	0.026041	0.0260388	-1.63875	-0.856337	-0.857308	0.0208266	0.0208296	-3.66639	23.7465	-3.66874	23.7566	-48.022	10	0.00658595
2017-03-27	HG200	17.0268	-0.690116	-0.685546	0.0246716	0.0246683	16.8525	-0.861405	-0.856835	0.0118527	0.0118507	2.07846	36.7071	2.06739	36.717	115.501	10	0.00374816
2017-03-29	HG50	-25.3411	-1.12049	-1.11762	0.0360643	0.0360606	-25.0776	-0.850377	-0.847517	0.0349501	0.0349498	-21.7924	17.6512	-21.7505	17.6597	-80.8039	10	0.0110522
2017-03-30	HG100	-1.22862	-0.859631	-0.86035	0.0309639	0.0309591	-1.23848	-0.869494	-0.870214	0.0117098	0.0117074	-3.66062	24.1568	-3.6628	24.167	-2.89808	10	0.00370297
2017-04-04	HG100	-2.64074	-0.836309	-0.837918	0.0207441	0.0207438	-2.67072	-0.866348	-0.867958	0.0244581	0.0244597	-3.65847	22.7105	-3.66139	22.7207	-85.7177	10	0.00773434
2017-04-04	HG50	-25.3716	-1.12342	-1.12065	0.0357531	0.0357499	-25.1027	-0.847801	-0.845054	0.0235135	0.023514	-21.7019	17.5338	-21.6601	17.5424	13.4669	10	0.00743562
2017-04-05	HG200	12.6656	-0.718099	-0.716278	0.0317694	0.0317677	12.5219	-0.859882	-0.858062	0.0162157	0.0162141	2.1834	32.2706	2.16991	32.2809	38.9502	10	0.00512785

## Sheet: ETF
	Gonfiantini						from/until	Brand
		Intercept	Intended		Slope:	1.07966	2016-07-06	Slope:	1.0586			Intercept	Intended
	HG	-0.867007	0.0266		Intercept:	0.962671	2016-12-22	Intercept:	0.94325		HG	-0.865907	0.0266
	25G	-0.0347059	0.9252								25G	-0.0170505	0.9252
		Intercept	Intended		Slope:	1.09806	2017-01-06	Slope:	1.07386			Intercept	Intended
	HG	-0.860968	0.0266		Intercept:	0.971995	2017-04-05	Intercept:	0.949564		HG	-0.85948	0.0266
	25G	-0.0426164	0.9252								25G	-0.0226878	0.9252
	AFF ∆47 (Passey & Henkes, 2012)
	90°C	0.081
	AFF δ18O (Kim et al., 2007)
		calcite	aragonite
	90	1.00813	1.00854

## Sheet: Summary
Sample	Replicates	δ13C (VPDB) G.	STERROR	δ13C (VPDB) B.	STERROR	δ18O (VPDB) G.	STERROR	δ18O (VPDB) B.	STERROR	∆47 G.	STERROR	∆47 B.	STERROR
130	10	-0.649713	0.0175165	-0.652623	0.017445	-0.404775	0.0580612	-0.395638	0.0580537	0.771686	0.0079283	0.764946	0.00778921
143	10	-0.324887	0.00877797	-0.328495	0.00876398	-0.0622798	0.0408073	-0.0531564	0.040808	0.757594	0.00405727	0.751237	0.00396796
ChHP1	5	1.73371	0.00626308	1.72496	0.00624588	0.381068	0.0116812	0.390402	0.0116856	0.775374	0.00439056	0.767216	0.00393431
D487L	6	-0.875342	0.0157092	-0.877769	0.0156784	-0.569138	0.0193276	-0.560031	0.0193272	0.764761	0.00462137	0.757482	0.00451286
DA5.25.1	5	2.05987	0.00815865	2.05035	0.00813178	0.622899	0.0308914	0.632257	0.030889	0.708168	0.0102859	0.700679	0.0101266
DA5.25.2	4	1.76179	0.0194013	1.75314	0.0193423	0.754233	0.0324771	0.763554	0.0324634	0.689275	0.00727859	0.683854	0.00715021
DS288L	6	1.76762	0.0063389	1.75915	0.00633525	1.1156	0.0153582	1.1249	0.0153593	0.738694	0.01353	0.731876	0.0129214
DS420L	6	0.753737	0.00772157	0.747587	0.00770568	0.511556	0.0119321	0.520769	0.011928	0.746775	0.00421638	0.739864	0.00407185
DS430L	6	2.17419	0.0194356	2.16459	0.0194006	1.02233	0.0257856	1.03166	0.0257821	0.727667	0.0071974	0.720863	0.0071306
DS431L	6	2.14249	0.00906906	2.13302	0.00905789	1.06276	0.0269961	1.07208	0.0269939	0.735937	0.0108905	0.728976	0.0102929
FTD1	4	2.01251	0.00715139	2.00399	0.00712367	2.30442	0.0108252	2.31365	0.0108221	0.760829	0.00904366	0.75396	0.00913748
GS183L	5	1.16565	0.0124617	1.15857	0.0124522	0.805783	0.0727241	0.815024	0.0727179	0.754055	0.0041942	0.747668	0.00408525
NN2V	6	2.43818	0.00486394	2.42821	0.00485458	1.67842	0.0154997	1.68776	0.0154937	0.747849	0.00501525	0.740943	0.00452062
PA.01	5	1.50533	0.00951637	1.49724	0.00950764	0.51656	0.0146889	0.525884	0.0146902	0.703673	0.00558548	0.697568	0.00577367
S006L	10	0.093803	0.0346057	0.0891355	0.0345314	-0.0252493	0.0375489	-0.0160698	0.0375492	0.755972	0.00722435	0.749464	0.00708856
SAMID10116	4	1.45709	0.0085793	1.45041	0.00856304	3.12075	0.0297298	3.12987	0.0297382	0.773473	0.00705209	0.767127	0.00679818
TC.01	5	0.82191	0.0105904	0.814252	0.0105683	-2.20341	0.0233108	-2.19401	0.0233033	0.670785	0.00698034	0.663812	0.00709485
WMF1	5	1.72171	0.00717476	1.71474	0.00717926	3.91625	0.0200156	3.92535	0.0200283	0.770423	0.00665538	0.765154	0.00646495
						Corrected by +0.1		Corrected by +0.1
