# Supplementary material for: Assessing kinetic fractionation in brachiopod calcite using clumped isotopes
Source: Sci Rep. 2018 Jan 11;8:533. doi: 10.1038/s41598-017-17353-7 (PMC5765054; doi:10.1038/s41598-017-17353-7)
Supplement: Supplementary file 3 — Supplementary Data 2 [file 41598_2017_17353_MOESM3_ESM.xlsx]

## Sheet: Summary
Sample	Replicates	δ13C (VPDB) G.	STERROR	δ13C (VPDB) B.	STERROR	δ18O (VPDB) G.	STERROR	δ18O (VPDB) B.	STERROR	∆47 G.	STERROR	∆47 B.	STERROR
130	10	-0.649713	0.0175165	-0.652623	0.017445	-0.404775	0.0580612	-0.395638	0.0580537	0.771686	0.0079283	0.764946	0.00778921
143	10	-0.324887	0.00877797	-0.328495	0.00876398	-0.0622798	0.0408073	-0.0531564	0.040808	0.757594	0.00405727	0.751237	0.00396796
ChHP1	5	1.73371	0.00626308	1.72496	0.00624588	0.381068	0.0116812	0.390402	0.0116856	0.775374	0.00439056	0.767216	0.00393431
D487L	6	-0.875342	0.0157092	-0.877769	0.0156784	-0.569138	0.0193276	-0.560031	0.0193272	0.764761	0.00462137	0.757482	0.00451286
DA5.25.1	5	2.05987	0.00815865	2.05035	0.00813178	0.622899	0.0308914	0.632257	0.030889	0.708168	0.0102859	0.700679	0.0101266
DA5.25.2	4	1.76179	0.0194013	1.75314	0.0193423	0.754233	0.0324771	0.763554	0.0324634	0.689275	0.00727859	0.683854	0.00715021
DS288L	6	1.76762	0.0063389	1.75915	0.00633525	1.1156	0.0153582	1.1249	0.0153593	0.738694	0.01353	0.731876	0.0129214
DS420L	6	0.753737	0.00772157	0.747587	0.00770568	0.511556	0.0119321	0.520769	0.011928	0.746775	0.00421638	0.739864	0.00407185
DS430L	6	2.17419	0.0194356	2.16459	0.0194006	1.02233	0.0257856	1.03166	0.0257821	0.727667	0.0071974	0.720863	0.0071306
DS431L	6	2.14249	0.00906906	2.13302	0.00905789	1.06276	0.0269961	1.07208	0.0269939	0.735937	0.0108905	0.728976	0.0102929
FTD1	4	2.01251	0.00715139	2.00399	0.00712367	2.30442	0.0108252	2.31365	0.0108221	0.760829	0.00904366	0.75396	0.00913748
GS183L	5	1.16565	0.0124617	1.15857	0.0124522	0.805783	0.0727241	0.815024	0.0727179	0.754055	0.0041942	0.747668	0.00408525
NN2V	6	2.43818	0.00486394	2.42821	0.00485458	1.67842	0.0154997	1.68776	0.0154937	0.747849	0.00501525	0.740943	0.00452062
PA.01	5	1.50533	0.00951637	1.49724	0.00950764	0.51656	0.0146889	0.525884	0.0146902	0.703673	0.00558548	0.697568	0.00577367
S006L	10	0.093803	0.0346057	0.0891355	0.0345314	-0.0252493	0.0375489	-0.0160698	0.0375492	0.755972	0.00722435	0.749464	0.00708856
SAMID10116	4	1.45709	0.0085793	1.45041	0.00856304	3.12075	0.0297298	3.12987	0.0297382	0.773473	0.00705209	0.767127	0.00679818
TC.01	5	0.82191	0.0105904	0.814252	0.0105683	-2.20341	0.0233108	-2.19401	0.0233033	0.670785	0.00698034	0.663812	0.00709485
WMF1	5	1.72171	0.00717476	1.71474	0.00717926	3.91625	0.0200156	3.92535	0.0200283	0.770423	0.00665538	0.765154	0.00646495

## Sheet: Offsets_Database
		from WOA'13					from 18-O Database	from WOA'13				‰, CDES 25	‰, CDES 25	‰, VPDB	‰, VPDB	‰, VPDB	CC Equilibrium			CC Equilibrium				[Gonfiantini]							[Brand]
Sample	Species	T (°C)	T (°C, max)	T (°C, min)	T (1/K2)	T (1/K2, error)	δ18Oseawater (SMOW)	Salinityseawater	MgCO3 (mol%)	GR (max)	GR (min)	∆47 [Gonf.]	∆47 [Brand]	δ18O [Gonf.]	δ18O [Brand]	δ13C [Gonf.]	Kim&O'Neil	Kim&O'Neil, Tmax	Kim&O'Neil, Tmin	Brand	Brand, Tmax	Brand, Tmin		Offset KO	Offset KO err.	Offset Brand	Error Brand err.	Offset ∆47 P&H5	Offset ∆47 Bonifacie3		Offset KO	Offset KO err.	Offset Brand	Error Brand err.	Offset ∆47 P&H5	Offset ∆47 Kelson1
130	Magellania venosa	11.36	13.19	9.77	12.3539	0.148325	-0.31	32.547	0.37	17.3294	3.80052	0.771686	0.764946	-0.404775	-0.395638	-0.649713	0.393554	-0.0115351	0.749906	1.14621	0.618529	1.60469		-0.798329	0.380721	-1.55099	0.49308	0.0376096	0.0431503		-0.789192	0.380721	-1.54185	0.49308	0.0308701	0.0297878
143	Magellania venosa	11.36	13.19	9.77	12.3539	0.148325	-0.31	32.547	0.36	17.3294	3.80052	0.757594	0.751237	-0.0622798	-0.0531564	-0.324887	0.393554	-0.0115351	0.749906	1.14451	0.616829	1.60299		-0.455833	0.380721	-1.20679	0.49308	0.0235179	0.0290586		-0.44671	0.380721	-1.19767	0.49308	0.0171603	0.016078
ChHP1	Hemithiris psittacea	1.56	3.2	-1.05	13.2511	0.20612	-2.55	31.765	0.31			0.775374	0.767216	0.381068	0.390402	1.73371	0.411088	0.0215051	1.0411	1.72185	1.24895	2.47444		-0.0300199	0.509797	-1.34078	0.612745	0.00876676	0.0089785		-0.0206859	0.509797	-1.33144	0.612745	0.000608954	-0.00535377
D487L	Terebratalia transversa	8.59	9.62	7.7	12.598	0.0857911	-0.76	31.087	0.34	16.6667	2.94118	0.764761	0.757482	-0.569138	-0.560031	-0.875342	0.566455	0.333246	0.769388	1.48984	1.19284	1.74647		-1.13559	0.218071	-2.05898	0.276817	0.0216885	0.0259235		-1.12649	0.218071	-2.04987	0.276817	0.0144095	0.0121435
DA5.25.1	Argyrotheca sp.	24.84	28.19	21.83	11.2615	0.239998	1.8	40.355	4.05531	1.2	0.5	0.708168	0.700679	0.622899	0.632257	2.05987	-0.364755	-1.03692	0.252613	-0.00425296	-0.970228	0.863682		0.987653	0.644767	0.627152	0.916955	0.01557	0.0257328		0.997011	0.644767	0.63651	0.916955	0.00808039	0.0110739
DA5.25.2	Megerlia sp.	24.84	28.19	21.83	11.2615	0.239998	1.8	40.355	4.10739	1.2	0.5	0.689275	0.683854	0.754233	0.763554	1.76179	-0.364755	-1.03692	0.252613	0.00460019	-0.961374	0.872536		1.11899	0.644767	0.749633	0.916955	-0.00332332	0.00683942		1.12831	0.644767	0.758954	0.916955	-0.00874458	-0.00575109
DS288L	Magasella sanguinea	13.27	15.44	11.68	12.1897	0.15955	0.27	34.811	0.67	9.28266	1.62243	0.738694	0.731876	1.1156	1.1249	1.76762	0.551041	0.0775547	0.902698	1.22646	0.60074	1.68494		0.56456	0.412572	-0.110859	0.542099	0.0107277	0.0170884		0.573857	0.412572	-0.101562	0.542099	0.00390994	0.00356556
DS420L	Calloria inconspicua	13.27	15.44	11.68	12.1897	0.15955	0.27	34.811	0.55	5.85366	1.62969	0.746775	0.739864	0.511556	0.520769	0.753737	0.551041	0.0775547	0.902698	1.20606	0.58034	1.66454		-0.0394848	0.412572	-0.694505	0.542099	0.0188083	0.0251691		-0.0302719	0.412572	-0.685292	0.542099	0.0118976	0.0115532
DS430L	Liothyrella neozelanica	13.27	15.44	11.68	12.1897	0.15955	0.27	34.811	0.67	6.86639	1.80623	0.727667	0.720863	1.02233	1.03166	2.17419	0.551041	0.0775547	0.902698	1.22646	0.60074	1.68494		0.47129	0.412572	-0.20413	0.542099	-0.000298975	0.00606179		0.48062	0.412572	-0.1948	0.542099	-0.00710362	-0.00744801
DS431L	Liothyrella neozelanica	13.27	15.44	11.68	12.1897	0.15955	0.27	34.811	0.55	6.86639	1.80623	0.735937	0.728976	1.06276	1.07208	2.14249	0.551041	0.0775547	0.902698	1.20606	0.58034	1.66454		0.511717	0.412572	-0.143302	0.542099	0.00797059	0.0143314		0.521044	0.412572	-0.133976	0.542099	0.00100969	0.000665308
FTD1	Terebratella dorsata	4.76	5.59	4.29	12.9477	0.0604494	-0.17	34.041	0.51			0.760829	0.75396	2.30442	2.31365	2.01251	2.04059	1.84703	2.15073	3.21312	2.97379	3.34865		0.263827	0.151848	-0.908703	0.187428	0.00505801	0.00723711		0.273055	0.151848	-0.899475	0.187428	-0.00181066	-0.00595773
GS183L	Magasella sanguinea	13.85	16.57	12.2	12.1405	0.183848	0.31	34.863	0.45	9.28266	1.62243	0.754055	0.747668	0.805783	0.815024	1.16565	0.46377	-0.126129	0.827266	1.06182	0.277503	1.5376		0.342013	0.476698	-0.256034	0.630046	0.0279283	0.0345259		0.351254	0.476698	-0.246794	0.630046	0.0215416	0.0214094
NN2V	Notosaria nigrigans	10.31	12.715	8.41	12.4456	0.188533	0.1	34.439	0.65	8		0.747849	0.740943	1.67842	1.68776	2.43818	1.0388	0.503262	1.46857	1.90658	1.2131	2.45444		0.639612	0.482653	-0.228163	0.620675	0.0103815	0.015444		0.648957	0.482653	-0.218819	0.620675	0.00347549	0.00196087
PA.01	Pajaudina atlantica	20.92	23.24	19.01	11.5637	0.166007	1.16	36.837	6.8	1.2	0.5	0.703673	0.697568	0.51656	0.525884	1.50533	-0.197309	-0.67702	0.203519	0.952678	0.283705	1.50343		0.71387	0.44027	-0.436118	0.609862	-0.000591517	0.00848314		0.723194	0.44027	-0.426794	0.609862	-0.00669648	-0.00463995
S006L	Terebratalia transversa	8.39	8.94	7.87	12.6159	0.0479399	-0.76	31.72	0.27	16.6667	2.94118	0.755972	0.749464	-0.0252493	-0.0160698	0.093803	0.611943	0.487012	0.730523	1.53561	1.37702	1.68555		-0.637192	0.121756	-1.56086	0.154268	0.0122439	0.016379		-0.628013	0.121756	-1.55168	0.154268	0.00573635	0.00337943
SAMID10116	Glaciarcula spitzbergensis	1	3.89	-1.32	13.3053	0.252114	-0.34	34.875	0.45			0.773473	0.767127	3.12075	3.12987	1.45709	2.76208	2.07436	3.32509	4.11712	3.28379	4.7861		0.358672	0.625366	-0.996374	0.751153	0.0049487	0.00479069		0.36779	0.625366	-0.987257	0.751153	-0.00139672	-0.0077021
TC.01	Thecidellina congregata	28.914	29.37	27.85	10.9598	0.0553177	0.09	34.066	5.24	1.2	0.5	0.670785	0.663812	-2.20341	-2.19401	0.82191	-2.88509	-2.97479	-2.67468	-2.6876	-2.81908	-2.38079		0.681675	0.150058	0.484185	0.219146	-0.0100308	0.00108248		0.691079	0.150058	0.49359	0.219146	-0.0170046	-0.0132114
WMF1	Magellania fragillis	0.06	0.87	-0.8	13.397	0.0819132	-0.39	34.572	0.76	1.15739	0.504957	0.770423	0.765154	3.91625	3.92535	1.72171	2.93884	2.74321	3.14786	4.39087	4.15731	4.63885		0.977416	0.202325	-0.47462	0.240773	-0.0013327	-0.00212935		0.986511	0.202325	-0.465525	0.240773	-0.00660223	-0.0135004

## Sheet: Offsets_DirectlyMeasured
		from WOA'13						from WOA'13				‰, CDES 25	‰, CDES 25	‰, VPDB	‰, VPDB	‰, VPDB	CC Equilibrium			CC Equilibrium				[Gonfiantini]							[Brand]
Sample	Species	T (°C)	T (°C, max)	T (°C, min)	T (1/K2)	T (1/K2, error)	δ18Oseawater (SMOW)	Salinityseawater	MgCO3 (mol%)	GR (max)	GR (min)	∆47 [Gonf.]	∆47 [Brand]	δ18O [Gonf.]	δ18O [Brand]	δ13C [Gonf.]	Kim&O'Neil	Kim&O'Neil, Tmax	Kim&O'Neil, Tmin	Brand	Brand, Tmax	Brand, Tmin		Offset KO	Offset KO err.	Offset Brand	Error Brand err.	Offset ∆47 P&H5	Offset ∆47 Bonifacie3		Offset KO	Offset KO err.	Offset Brand	Error Brand err.	Offset ∆47 P&H5	Offset ∆47 Kelson1
130	Magellania venosa	11.36	13.19	9.77	12.3539	0.148325	-1.21	32.547	0.37	17.3294	3.80052	0.771686	0.764946	-0.404775	-0.395638	-0.649713	-0.50708	-0.911804	-0.151048	0.24621	-0.281471	0.704688		0.102304	0.380378	-0.650986	0.49308	0.0376096	0.0431503		0.111441	0.380378	-0.641849	0.49308	0.0308701	0.0297878
143	Magellania venosa	11.36	13.19	9.77	12.3539	0.148325	-1.21	32.547	0.36	17.3294	3.80052	0.757594	0.751237	-0.0622798	-0.0531564	-0.324887	-0.50708	-0.911804	-0.151048	0.24451	-0.283171	0.702988		0.4448	0.380378	-0.30679	0.49308	0.0235179	0.0290586		0.453923	0.380378	-0.297667	0.49308	0.0171603	0.016078
ChHP1	Hemithiris psittacea	1.56	3.2	-1.05	13.2511	0.20612	-3.35	31.765	0.31			0.775374	0.767216	0.381068	0.390402	1.73371	-0.391287	-0.780557	0.238219	0.921846	0.448951	1.67444		0.772355	0.509388	-0.540779	0.612745	0.00876676	0.0089785		0.781689	0.509388	-0.531445	0.612745	0.000608954	-0.00535377
D487L	Terebratalia transversa	8.59	9.62	7.7	12.598	0.0857911	-1.84	31.087	0.34	16.6667	2.94118	0.764761	0.757482	-0.569138	-0.560031	-0.875342	-0.514979	-0.747936	-0.312265	0.409842	0.11284	0.666474		-0.0541596	0.217836	-0.97898	0.276817	0.0216885	0.0259235		-0.0450526	0.217836	-0.969873	0.276817	0.0144095	0.0121435
DA5.25.1	Argyrotheca sp.	24.84	28.19	21.83	11.2615	0.239998	1.86	40.355	4.05531	1.2	0.5	0.708168	0.700679	0.622899	0.632257	2.05987	-0.304884	-0.977092	0.31252	0.055747	-0.910228	0.923682		0.927783	0.644806	0.567152	0.916955	0.01557	0.0257328		0.937141	0.644806	0.57651	0.916955	0.00808039	0.0110739
DA5.25.2	Megerlia sp.	24.84	28.19	21.83	11.2615	0.239998	1.86	40.355	4.10739	1.2	0.5	0.689275	0.683854	0.754233	0.763554	1.76179	-0.304884	-0.977092	0.31252	0.0646002	-0.901374	0.932536		1.05912	0.644806	0.689633	0.916955	-0.00332332	0.00683942		1.06844	0.644806	0.698954	0.916955	-0.00874458	-0.00575109
DS288L	Magasella sanguinea	13.27	15.44	11.68	12.1897	0.15955	0.3	34.811	0.67	9.28266	1.62243	0.738694	0.731876	1.1156	1.1249	1.76762	0.581049	0.107549	0.932717	1.25646	0.63074	1.71494		0.534552	0.412584	-0.140859	0.542099	0.0107277	0.0170884		0.543849	0.412584	-0.131562	0.542099	0.00390994	0.00356556
DS420L	Calloria inconspicua	13.27	15.44	11.68	12.1897	0.15955	0.3	34.811	0.55	5.85366	1.62969	0.746775	0.739864	0.511556	0.520769	0.753737	0.581049	0.107549	0.932717	1.23606	0.61034	1.69454		-0.0694933	0.412584	-0.724505	0.542099	0.0188083	0.0251691		-0.0602803	0.412584	-0.715292	0.542099	0.0118976	0.0115532
DS430L	Liothyrella neozelanica	13.27	15.44	11.68	12.1897	0.15955	0.3	34.811	0.67	6.86639	1.80623	0.727667	0.720863	1.02233	1.03166	2.17419	0.581049	0.107549	0.932717	1.25646	0.63074	1.71494		0.441281	0.412584	-0.23413	0.542099	-0.000298975	0.00606179		0.450611	0.412584	-0.2248	0.542099	-0.00710362	-0.00744801
DS431L	Liothyrella neozelanica	13.27	15.44	11.68	12.1897	0.15955	0.3	34.811	0.55	6.86639	1.80623	0.735937	0.728976	1.06276	1.07208	2.14249	0.581049	0.107549	0.932717	1.23606	0.61034	1.69454		0.481709	0.412584	-0.173302	0.542099	0.00797059	0.0143314		0.491036	0.412584	-0.163976	0.542099	0.00100969	0.000665308
FTD1	Terebratella dorsata	4.76	5.59	4.29	12.9477	0.0604494	-0.17	34.041	0.51			0.760829	0.75396	2.30442	2.31365	2.01251	2.04059	1.84703	2.15073	3.21312	2.97379	3.34865		0.263827	0.151848	-0.908703	0.187428	0.00505801	0.00723711		0.273055	0.151848	-0.899475	0.187428	-0.00181066	-0.00595773
GS183L	Magasella sanguinea	13.85	16.57	12.2	12.1405	0.183848	0.31	34.863	0.45	9.28266	1.62243	0.754055	0.747668	0.805783	0.815024	1.16565	0.46377	-0.126129	0.827266	1.06182	0.277503	1.5376		0.342013	0.476698	-0.256034	0.630046	0.0279283	0.0345259		0.351254	0.476698	-0.246794	0.630046	0.0215416	0.0214094
NN2V	Notosaria nigrigans	10.31	12.715	8.41	12.4456	0.188533	0.1	34.439	0.65	8		0.747849	0.740943	1.67842	1.68776	2.43818	1.0388	0.503262	1.46857	1.90658	1.2131	2.45444		0.639612	0.482653	-0.228163	0.620675	0.0103815	0.015444		0.648957	0.482653	-0.218819	0.620675	0.00347549	0.00196087
PA.01	Pajaudina atlantica	20.92	23.24	19.01	11.5637	0.166007	1.07	36.837	6.8	1.2	0.5	0.703673	0.697568	0.51656	0.525884	1.50533	-0.287187	-0.766855	0.113605	0.862678	0.193705	1.41343		0.803748	0.44023	-0.346118	0.609862	-0.000591517	0.00848314		0.813071	0.44023	-0.336794	0.609862	-0.00669648	-0.00463995
S006L	Terebratalia transversa	8.39	8.94	7.87	12.6159	0.0479399	-1.84	31.72	0.27	16.6667	2.94118	0.755972	0.749464	-0.0252493	-0.0160698	0.093803	-0.46954	-0.594336	-0.351088	0.455612	0.297019	0.605554		0.444291	0.121624	-0.480861	0.154268	0.0122439	0.016379		0.45347	0.121624	-0.471681	0.154268	0.00573635	0.00337943
SAMID10116	Glaciarcula spitzbergensis	1	3.89	-1.32	13.3053	0.252114	-0.34	34.875	0.45			0.773473	0.767127	3.12075	3.12987	1.45709	2.76208	2.07436	3.32509	4.11712	3.28379	4.7861		0.358672	0.625366	-0.996374	0.751153	0.0049487	0.00479069		0.36779	0.625366	-0.987257	0.751153	-0.00139672	-0.0077021
TC.01	Thecidellina congregata	28.914	29.37	27.85	10.9598	0.0553177	-0.13	34.066	5.24	1.2	0.5	0.670785	0.663812	-2.20341	-2.19401	0.82191	-3.10443	-3.19412	-2.89407	-2.9076	-3.03908	-2.60079		0.90102	0.150025	0.704185	0.219146	-0.0100308	0.00108248		0.910425	0.150025	0.71359	0.219146	-0.0170046	-0.0132114
WMF1	Magellania fragillis	0.06	0.87	-0.8	13.397	0.0819132	-0.39	34.572	0.76	1.15739	0.504957	0.770423	0.765154	3.91625	3.92535	1.72171	2.93884	2.74321	3.14786	4.39087	4.15731	4.63885		0.977416	0.202325	-0.47462	0.240773	-0.0013327	-0.00212935		0.986511	0.202325	-0.465525	0.240773	-0.00660223	-0.0135004
