# Supplementary material for: Assessing kinetic fractionation in brachiopod calcite using clumped isotopes
Source: Sci Rep. 2018 Jan 11;8:533. doi: 10.1038/s41598-017-17353-7 (PMC5765054; doi:10.1038/s41598-017-17353-7)
Supplement: Supplementary file 4 — Supplementary Data 3 [file 41598_2017_17353_MOESM4_ESM.xlsx]

## Sheet: 1
M. venosa (142)					M. venosa (130)
Layer	Rel. Dist.	d18O	Std. Dev.		Layer	Rel. Dist.	d18O	Std. Dev.
Transect 1					Transect 1
secondary	0	-2.01874	0.260004		secondary	0	-2.91434	0.257748
secondary	12	-0.9833	0.26134		secondary	17	-2.83452	0.283425
secondary	24	-0.439535	0.260681		secondary	34	-1.10744	0.289556
secondary	37	-0.029024	0.261009		secondary	50	0.473064	0.284066
secondary	49	0.306402	0.274079		secondary	67	1.34923	0.273542
secondary	61	0.410662	0.267678		secondary	84	1.05661	0.276156
secondary	73	0.229801	0.284528		secondary	100	0.477395	0.274571
secondary	86	0.485085	0.267942
secondary	100	0.598645	0.282843
